# Supplementary material
Source: publisher figshare collection journal article supplement (https://acs.figshare.com/ndownloader/files/5787024)
Supplement: Supplementary file 1 [file 5787024]

# Cyclic Alkenenitriles: Chemoselective Oxonitrile Cyclizations

Fraser F. Fleming,\* Lee A. Funk, Ramazan Altundas, and Vaqar Sharief.

## Supporting Information Table of Contents

| Compound                                                          | Procedure | <sup>1</sup> H NMR | <sup>13</sup> C NMR                                    |
|-------------------------------------------------------------------|-----------|--------------------|--------------------------------------------------------|
| <b>4b</b>                                                         | S3        | Reference          | Reference                                              |
| <b>4c</b>                                                         | S3        | S13                | S14                                                    |
| ethyl 1-(3-cyanopropyl)-2-oxocyclohexanecarboxylate ( <b>ii</b> ) | S4        | S15                | S16                                                    |
| <b>4d</b>                                                         | S4        | S17                | S18                                                    |
| 1-propylpiperidin-4-one                                           | S5        | S19                | S20                                                    |
| dimethylhydrazone                                                 |           |                    |                                                        |
| 3-(4-Chlorobutyl)-1-propylpiperidin-4-one                         | S5        | S21                | S22                                                    |
| <b>4e</b>                                                         | S5        | S23                | S24                                                    |
| <b>4f</b>                                                         | S5        | S25                | S26                                                    |
| <b>4g</b>                                                         | S6        | S27                | S28                                                    |
| <b>4h</b>                                                         | S6        | S29                | S30                                                    |
| 3-methyl-6-oxo-hexanenitrile                                      | S7        | S31                | S32                                                    |
| 3-methyl-6-hydroxyheptane nitrile                                 | S7        | S33                | S34                                                    |
| <b>4i</b>                                                         | S8        | S35                | S36 (CDCl <sub>3</sub> )<br>S37 (DMSO-d <sub>6</sub> ) |
| <b>7a</b>                                                         | S8        | S38                | S39                                                    |
| 5-isopropenyl-2-methylcyclopent-1-ene-1-carboxamide               | S9        | S40                | S41                                                    |
| <b>7b</b>                                                         | S9        | S42                | S43                                                    |
| <b>7c</b>                                                         | S9        | S44                | S45                                                    |
| <b>7d</b>                                                         | S9        | S46                | S47                                                    |
| <b>6d</b>                                                         | S9        | S48                | S49                                                    |
| <b>7e</b>                                                         | S10       | S50                | S51                                                    |
| <b>7f</b>                                                         | S10       | S52                | S53                                                    |
| <b>7g</b>                                                         | S11       | Reference          | S54                                                    |
| <b>7h</b>                                                         | S11       | Reference          | Reference                                              |
| <b>11i</b>                                                        | S11       | S55                | S56                                                    |
| <b>References</b>                                                 | S57       |                    |                                                        |

The cyclization precursors **4b – h** were prepared as outlined in the following scheme:

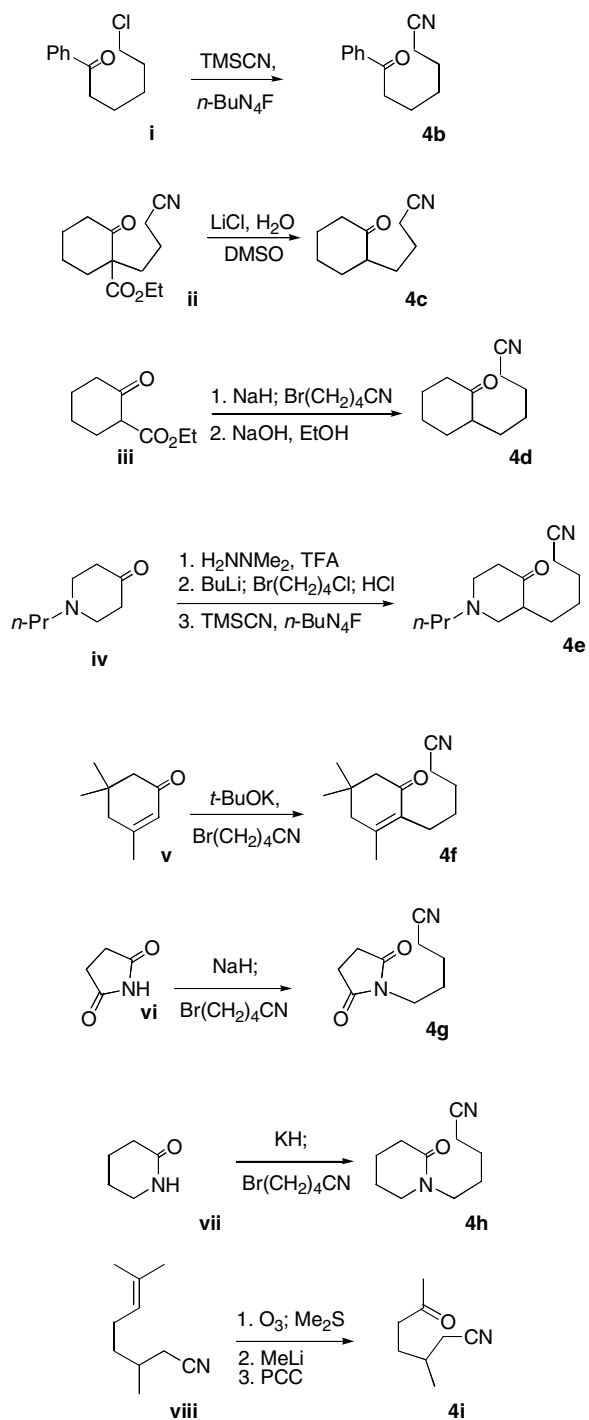

## Preparation of Cyclization Precursors

**7-Oxo-7-phenylheptanenitrile (4b):** A THF solution of *n*-Bu<sub>4</sub>NF (0.72 mmol), and neat trimethylsilyl cyanide<sup>1</sup> (0.72 mmol), were sequentially added to an acetonitrile solution of 6-chloro-1-phenylhexan-1-one<sup>2</sup> (100.7 mg, 0.48 mmol). After 16 h the reaction was diluted with water and CH<sub>2</sub>Cl<sub>2</sub>, the organic phase was separated, washed with water (3x), and then dried (Na<sub>2</sub>SO<sub>4</sub>). The resulting solution was concentrated under reduced pressure and then purified by radial chromatography (1:99 EtOAc/hexanes, 1 mm plate) to afford 65.2 mg (68%) of **4b** as a white solid that was spectrally identical to material previously synthesized.<sup>3</sup>

**4-(2-Oxocyclohexyl)butanenitrile (4c):** A DMSO (5 mL) solution of ethyl 1-(3-cyanopropyl)-2-oxocyclohexanecarboxylate (**ii**)<sup>4</sup> (1.00 g, 2.88 mmol), H<sub>2</sub>O (62mL, 3.5 mmol), and LiCl (147.0 mg, 3.5 mmol) was refluxed for 6h. After cooling aqueous, saturated NaCl was added and the mixture extracted with EtOAc. The aqueous phase was extracted with EtOAc (3x), and the organic extracts were combined. The combined extracts were dried (Na<sub>2</sub>SO<sub>4</sub>) and concentrated to afford 450 mg (65%) of pure **4c**<sup>5</sup> as an oil: IR (film) 2245, 1710 cm<sup>-1</sup>; <sup>1</sup>H NMR 1.25-2.60 (m, 15H); <sup>13</sup>C NMR 14.0, 16.7, 22.4, 23.4, 25.6, 27.4, 33.7, 36.0, 40.9, 60.4, 61.2, 119.3, 171.7, 208.0.

**5-(2-Oxocyclohexyl)pentanenitrile (4d):** Neat ethyl 2-oxocyclohexanecarboxylate (400.0 mg, 2.35 mmol) was added drop wise to a 0 °C, stirred THF (10 mL) slurry of NaH (67.8 mg, 2.83 mmol). Neat bromovaleronitrile (494.2 mg, 3.05 mmol) and solid NaI (70.0 mg, 0.467 mmol) were added and then the reaction was heated at reflux. After 24 h the reaction was allowed to cool, saturated, aqueous NH<sub>4</sub>Cl was added, the organic phase separated, and the aqueous phase

was extracted with EtOAc. The combined organic extracts were dried ( $\text{Na}_2\text{SO}_4$ ), concentrated under reduced pressure, and then purified by radial chromatography (3:10 EtOAc/hexanes, 4 mm plate) to afford 439.7 mg (74%) of ethyl 1-(4-cyanobutyl)-2-oxocyclohexanecarboxylate as an oil: IR (film) 2242, 1712  $\text{cm}^{-1}$ ;  $^1\text{H}$  NMR 1.28 (t,  $J=7.1$  Hz, 3H), 1.31-2.07 (m, 10H), 2.34 (t,  $J=7$  Hz, 2H); 2.42-2.54 (m, 4H), 4.22 (q,  $J=7.1$  Hz, 2H);  $^{13}\text{C}$  NMR 14.0, 16.7, 22.4, 23.4, 25.6, 27.4, 33.7, 36.1, 60.4, 61.2, 119.3, 171.7, 207.6. Aqueous NaOH (2M, 7 mL) was added to an ethanolic solution (7 mL) of ethyl 1-(4-cyanobutyl)-2-oxocyclohexanecarboxylate (741.2 mg, 2.95 mmol) and after 60 h saturated, aqueous NaCl was added followed by 1M HCl until a pH of 2. The organic phase was separated, the aqueous phase was extracted with EtOAc (3x), and the organic extracts were combined. The combined extracts were dried ( $\text{Na}_2\text{SO}_4$ ), concentrated under reduced pressure, and then purified by radial chromatography (1:5 EtOAc/hexanes, 4 mm plate) to afford 399.6 mg (76%) of **4d**<sup>6</sup> as an oil: IR (film) 2245, 1709  $\text{cm}^{-1}$ ;  $^1\text{H}$  NMR 1.15-1.48 (m, 3H), 1.43 (pent,  $J = 8$  Hz, 2H), 1.61-1.88 (m, 6H), 1.93-2.13 (m, 2H), 2.21-2.40 (m, 2H), 2.34 (t,  $J = 7$  Hz, 2H);  $^{13}\text{C}$  NMR 17.0, 25.0, 25.5, 26.3, 28.0, 26.3, 28.0, 28.5, 34.0, 42.1, 50.4, 119.7, 212.8 MS  $m/e$  180 ( $\text{M} + \text{H}$ ).

**5-(4-Oxo-1-propylpiperidin-3-yl)pentanenitrile (4e):** A benzene solution (50 mL) of 1-propyl-4-piperidone (3.67 g, 26.0 mmol), N,N-dimethylhydrazine (2.37 mL, 31.2 mmol), and trifluoroacetic acid (0.5 mL) was heated at reflux using a Dean Stark apparatus. After 5 h the mixture was cooled to room temperature, and then diluted with ether and water. The organic phase was separated, washed with brine, dried ( $\text{Na}_2\text{SO}_4$ ), concentrated under reduced pressure, and distilled to afford 4.29 g (90%) of 1-propylpiperidin-4-one dimethylhydrazone as an oil: IR (film) 1642;  $^1\text{H}$  NMR 0.87 (t,  $J = 7$  Hz, 3H), 1.48 (sext,  $J = 7$  Hz, 2H), 2.26-2.36 (m, 4H), 2.40

(s, 6H), 2.45-2.49 (m, 2H), 2.54 (t,  $J = 6$  Hz, 2H), 2.62 (t,  $J = 5.8$  Hz, 2H);  $^{13}\text{C}$  NMR 11.7, 20.1, 28.3, 34.8, 47.2, 52.9, 53.8, 59.8, 166.8; MS  $m/e$  184 ( $M + 1$ ). A hexane solution of *n*-BuLi (9.26 mmol) was added to a cold ( $0^\circ\text{C}$ ) THF solution of 1-propylpiperidin-4-one dimethylhydrazone (1.54 g, 8.42 mmol). After 1h, a THF solution of 1-bromo-4-chlorobutane (1.59 g, 9.26 mmol) was added followed, after 16 h, by hydrolysis with 2 M HCl (23.2 mL, 46.3 mmol) for 1 h. The organic phase was then separated and the aqueous phase extracted with  $\text{CH}_2\text{Cl}_2$ . The combined organic extracts were then sequentially washed with water and brine, and then dried ( $\text{Na}_2\text{SO}_4$ ). The dry solution was concentrated under reduced pressure and the crude product was purified by radial chromatography (1:9 EtOAc/hexane) to provide 1.15 g (59%) of 3-(4-Chlorobutyl)-1-propylpiperidin-4-one as an oil: IR (film)  $1714\text{ cm}^{-1}$ ;  $^1\text{H}$  NMR 0.94 (t,  $J = 7$  Hz, 3H), 1.17-1.29 (m, 2H), 1.44 (pent,  $J = 8$  Hz, 2H), 1.55 (sext,  $J = 7$  Hz, 2H), 1.67-1.88 (m, 2H), 2.15 (t,  $J = 11$  Hz, 1H), 2.34-2.63 (m, 6H), 3.05-3.10 (m, 2H), 3.53 (t,  $J = 6.6$  Hz, 2H);  $^{13}\text{C}$  NMR 11.8, 20.6, 24.4, 26.5, 32.6, 41.0, 44.7, 49.5, 53.8, 59.1, 59.3, 210.6; MS  $m/e$  232 ( $M + 1$ ). 3-(4-Chlorobutyl)-1-propylpiperidin-4-one was converted to the corresponding nitrile as described for **4b** with 3-(4-chlorobutyl)-1-propylpiperidin-4-one (412.8 mg, 1.78 mmol) to afford after purification (1:5 EtOAc/hexanes, 4 mm plate) 254.0 mg (64%) of **4e** as an oil: IR (film)  $2246, 1716\text{ cm}^{-1}$ ;  $^1\text{H}$  NMR 0.93 (t,  $J = 7$  Hz, 3H), 1.17-1.29 (m, 2H), 1.34-1.88 (m, 6H), 2.14 (t,  $J = 10.9$  Hz, 2H), 2.20-2.63 (m, 7H), 3.03-3.10 (m, 1H), 3.07 (dd,  $J = 11, 5$  Hz, 1H);  $^{13}\text{C}$  NMR 11.8, 17.0, 20.6, 25.5, 26.3, 26.5, 41.0, 49.4, 53.8, 59.2, 59.3, 119.5, 210.5; MS  $m/e$  223 ( $M + 1$ ).

**5-(2,4,4-Trimethyl-6-oxocyclohex-1-en-1-yl)pentanenitrile (4f):** Solid *t*-BuOK (115.3 mg, 1.03 mmol) was added to a rt, THF solution (10 mL) of isophorone (95.0 mg, 0.688 mmol)

followed, after 30 min, by the slow addition of a THF solution (5 mL) of iodovaleronitrile (171.8 mg, 0.822 mmol). After 12 h, saturated, aqueous  $\text{NH}_4\text{Cl}$  was added, the organic phase was separated, and the aqueous phase was extracted with  $\text{CH}_2\text{Cl}_2$ . The combined organic extracts were dried ( $\text{Na}_2\text{SO}_4$ ), concentrated under reduced pressure, and then purified by radial chromatography (1:5 EtOAc/hexanes, 2mm plate) to afford 49.0 mg (77% based on recovered starting material) of **4f** as an oil: IR (film) 2245, 1661, 1632  $\text{cm}^{-1}$ ;  $^1\text{H}$  NMR 0.99 (s, 6H), 1.40-1.51 (m, 2H), 1.64 (pent,  $J = 7$  Hz, 2H), 1.92 (s, 3H), 2.22 (s, 4H), 2.31 (t,  $J = 7$  Hz, 2H), 2.36 (t,  $J = 7$  Hz, 2H);  $^{13}\text{C}$  NMR 16.8, 21.2, 23.8, 25.2, 27.9, 28.1, 32.6, 46.9, 51.2, 119.7, 133.6, 153.2, 198.8; MS  $m/e$  220 ( $\text{M} + \text{H}$ ).

**5-(2,5-Dioxopyrrolidin-1-yl)pentanenitrile (4g):** Solid NaH (57.6 mg of a 60% dispersion in mineral oil, 1.44 mmol) was added to a rt, THF solution (10 mL) of succinimide (119.6 mg, 1.21 mmol) and, after 1 h, a THF solution (5 mL) of iodovaleronitrile (302.0 mg, 1.45 mmol) was slowly added. After 16 h saturated, aqueous  $\text{NaHCO}_3$  was added and the aqueous phase extracted with  $\text{CH}_2\text{Cl}_2$ . The combined organic extracts were dried ( $\text{Na}_2\text{SO}_4$ ), concentrated under reduced pressure, and purified by radial chromatography (1:9 EtOAc/Hexanes, 2 mm plate) to afford 111.8 mg of **4g** (51%) as an oil: IR (film) 2246, 1774, 1698  $\text{cm}^{-1}$ ;  $^1\text{H}$  NMR 1.60-1.80 (m, 4H), 2.39 (t,  $J = 7$  Hz, 2H), 2.71 (s, 4H), 3.54 (t,  $J = 7$  Hz, 2H);  $^{13}\text{C}$  NMR 16.6 22.7 26.7 28.1 37.5 119.1 177.1 MS  $m/e$  181 ( $\text{M} + \text{H}$ ).

**5-(2-Oxopiperidin-1-yl)pentanenitrile (4h):** A THF solution (20 mL) of valerolactam (214.2 mg, 2.16 mmol) was slowly added to a THF washed slurry of KH (181.8 mg, 4.53 mmol). After 3 h, a THF solution (10 mL) of iodovaleronitrile (538.5 mg, 2.57 mmol) was added and after a

further 16 h saturated, aqueous  $\text{NaHCO}_3$  (50 mL) was added. The organic phase was separated and then the aqueous phase was extracted with  $\text{CH}_2\text{Cl}_2$ . The combined organic extracts were dried ( $\text{Na}_2\text{SO}_4$ ), concentrated under reduced pressure, and then purified by radial chromatography (1:5 EtOAc/hexanes, 4 mm plate) to afford 229.3 mg (59%) of **4h** as an oil: IR (film) 2246, 1666  $\text{cm}^{-1}$ ;  $^1\text{H}$  NMR 1.57-1.83 (m, 8H), 2.32-2.36 (m, 2H), 2.40 (t,  $J = 7$  Hz, 2H), 3.22-3.26 (m, 2H), 3.38 (t,  $J = 7$  Hz, 2H);  $^{13}\text{C}$  NMR 16.7, 21.3, 22.5, 23.2, 25.8, 32.2, 45.5, 47.7, 119.5, 169.8; MS  $m/e$  181 ( $\text{M} + \text{H}$ ).

**3-Methyl-6-oxoheptanenitrile (4i):** Ozonolysis of a dichloromethane solution (60 mL) of **vii**<sup>7</sup> (1.47 g, 9.72 mmol), terminating the ozonolysis immediately upon observing the distinctive blue color of ozone was followed by addition of neat dimethylsulfide (2 mL) at  $-78$  °C. The resultant mixture was allowed to warm to room temperature, stirred for 20 h, and then the solvent was removed under reduced pressure. Chromatography of the crude product (4 mm silica gel plate, 2:8 EtOAc:hexanes) and concentration of the appropriate fractions under reduced pressure gave 892 mg (73%) of 3-methyl-6-oxo-hexanenitrile as an oil: IR (film) 2246, 1726  $\text{cm}^{-1}$ ;  $^1\text{H}$  NMR 1.09 (d,  $J = 6.6$  Hz, 3H), 1.58-1.90 (m, 3H), 2.32 (br t,  $J = 6$  Hz, 2H), 2.51 (br t,  $J = 7$  Hz, 2H), 9.78 (br t,  $J = 1$  Hz, 1 H);  $^{13}\text{C}$  NMR 19.1, 24.3, 27.8, 29.9, 41.1, 118.6, 201.8; GC/MS  $m/e$  126 (MH). An ethereal solution of methyllithium (6.82 mL, 1.5 M) was added to a stirred THF solution (35 mL) of 3-methyl-6-oxo-hexanenitrile (853 mg, 6.82 mmol). After 4 h aqueous, saturated ammonium chloride was added. The crude reaction mixture was extracted with EtOAc, washed with brine, dried over magnesium sulfate, and evaporated under reduced pressure. Radial chromatography of the crude product (4 mm silica gel plate, 3:7 EtOAc:hexanes) gave 189 mg (22%) of the starting aldehyde and 552 mg (57%) of 3-methyl-6-hydroxyheptanenitrile as an oil: IR (film) 3452, 2965, 2243  $\text{cm}^{-1}$ ;  $^1\text{H}$  NMR : 1.02-1.45 (m, 9H), 1.81-1.93 (m, 2 H), 2.09-2.35 (m, 2H), 3.74 (br sextet,  $J = 6$  Hz, 1H);  $^{13}\text{C}$  NMR : 19.4, 23.7, 24.5, 30.6, 32.0, 36.4, 68.0,

118.7; GC/MS  $m/e$  142 (MH). Pyridinium chlorochromate (1.04 g, 4.8 mmol) was added to a stirred, dichloromethane solution (23 mL) of 3-methyl-6-hydroxyheptane nitrile (454 mg, 3.2 mmol). After 12 h diethylether (5 mL) was added, the heterogenous mixture was sonicated (2 min) and was then passed through a plug of Florisil (elution with diethylether). Removal of the solvent under reduced pressure followed by radial chromatography (4 mm silica gel plate, 2:8 EtOAc:hexanes) afforded 370 mg (83%) of **4i** as a colorless oil. IR (film): 2970, 2245, 1715  $\text{cm}^{-1}$ ;  $^1\text{H}$  NMR 1.07 (d,  $J = 6.7$  Hz, 3H), 1.57-1.63 (m, 1H), 1.73 (ddd,  $J = 20, 14, 7$  Hz, 1H), 1.87 (ddd,  $J = 20, 14, 7$  Hz, 1H), 2.16 (s, 3H), 2.25 (br dd,  $J = 17, 7$  Hz, 1H), 2.33 (dd,  $J = 17, 6$  Hz, 1H), 2.48 (br t,  $J = 7$  Hz, 2H);  $^{13}\text{C}$  NMR 19.2, 24.5, 29.5, 29.9, 30.4, 40.7, 118.4, 207.6; GC/MS:  $m/e$  140 (MH).

### General counter-intuitive cyclization procedure

Solid *t*-BuOK (5 equiv) was added to a refluxing, THF solution of the ketonitrile (1 equiv, 0.01-0.05 M). After 5 h the solution was cooled, saturated, aqueous,  $\text{NH}_4\text{Cl}$  was added, the organic phase was separated, and the aqueous phase was extracted with  $\text{CH}_2\text{Cl}_2$  (3x). The combined organic extracts were dried ( $\text{Na}_2\text{SO}_4$ ), concentrated under reduced pressure, and then purified by radial chromatography (EtOAc/Hexanes).

**5-Isopropenyl-2-methylcyclopent-1-ene-1-carbonitrile (7a):** The general procedure was employed with **4a**<sup>8</sup> (108.5 mg, 0.657 mmol), except that the solution was stirred at room temperature rather than at reflux, followed, after 5 h, by addition of aqueous hydrochloric acid (2%) to afford, after chromatography (1:9 EtOAc/hexanes, 1 mm plate), 57.9 mg (60%) of **7a** as an oil: IR (film) 3078, 2211, 1728, 1638  $\text{cm}^{-1}$ ;  $^1\text{H}$  NMR 1.69 (s, 3H), 1.72-1.84 (m, 1H), 2.03 (s, 3H), 2.10-2.26 (m, 1H), 2.43-2.51 (m, 2H), 3.49-3.56 (m, 1H), 4.82 (d,  $J = 2.7$  Hz, 2H);  $^{13}\text{C}$



NMR 16.7, 19.3, 29.0, 37.5, 54.4, 112.0 (resolves to 113.1 and 113.6 in CS<sub>2</sub>), 116.5, 144.8, 161.8; MS *m/e* 148 (M + H). Repetition of the reaction at reflux generates a 1:1 mixture of **7a** and the corresponding amide 5-isopropenyl-2-methylcyclopent-1-ene-1-carboxamide: IR (film) 3377, 3289, 3181, 3082, 1634 cm<sup>-1</sup>; <sup>1</sup>H NMR 1.74 (s, 3H), 2.05 (s, 3H), 2.46-2.55 (m, 5H), 2.76 (dd, *J* = 13, 8 Hz, 1H), 2.88 (pent, *J* = 8 Hz, 1H), 4.73-4.74 (m, 2H); <sup>13</sup>C NMR 20.5, 28.1, 35.7, 39.0, 42.7, 105.2, 109.5, 147.1, 162.2; MS *m/e* 166 (M + H).

**2-Phenylcyclohex-1-ene-1-carbonitrile (7b):** The general procedure was employed with **4b** (20.3 mg, 0.101 mmol), using 1eq of *t*-BuOK (11.0 mg, 0.100 mmol) to provide, after chromatography (1:19 EtOAc/hexanes, 1 mm plate), 12.3 mg (66%) of **7b** as an oil: IR (Film) 3057, 2207 cm<sup>-1</sup>; <sup>1</sup>H NMR 1.76-1.81 (m, 4H), 2.40-2.49 (m, 4H), 7.38 (s, 5H); <sup>13</sup>C NMR 21.3, 21.8, 28.3, 31.3, 107.9, 119.7, 127.1, 128.5, 128.8, 140.1, 155.4; MS *m/e* 184 (M + H).

**2,4,5,6,7,7a-Hexahydro-1H-indene-3-carbonitrile (7c):** The general procedure was employed with **4c** (82.0 mg, 0.496 mmol) to afford, after chromatography (1:9 EtOAc/hexanes, 1 mm plate), 57.4 mg (79%) of **7c** as an oil: IR (film); 2212, 1644 cm<sup>-1</sup>; <sup>1</sup>H NMR 1.02 (qd, *J* = 12, 3 Hz, 1H), 1.15-1.67 (m, 3H), 1.73-2.02 (m, 4H), 2.11-2.22 (m, 1H), 2.49-2.54 (m, 3H), 2.79 (d, *J* = 12.9 Hz, 1H); <sup>13</sup>C NMR 25.0, 26.2, 28.3, 29.6, 32.6, 34.9, 46.6, 104.1, 116.8, 166.0.

**2,3,4,4a,5,6,7,8-Octahydronaphthalene-1-carbonitrile (7d):** The general procedure was employed with **4d** (56.3 mg, 0.315 mmol) to afford, after chromatography (1:9 EtOAc/hexanes, 1 mm plate), 33.8 mg (67%) of **7d**: IR (film); 2930, 2856, 2207, 1634 cm<sup>-1</sup>; <sup>1</sup>H NMR 1.11-2.03

(m, 12H), 2.18-2.23 (m, 2H), 2.91-2.96 (m, 1H);  $^{13}\text{C}$  NMR 28.6, 31.0, 35.1, 35.6, 38.0, 42.2, 43.2, 46.6, 112.4, 127.4, 167.8. MS  $m/e$  161 (M). Prematurely terminating the reaction affords intermediate alcohol **6d** as a crystalline solid (mp 82-83 °C), tentatively assigned the *trans*-decalin stereochemistry: IR (film); 3546, 2236  $\text{cm}^{-1}$ ;  $^1\text{H}$  NMR 1.16-2.06 (m, 16H), 2.37 (dd,  $J=12$ , 4.5 Hz, 1H);  $^{13}\text{C}$  NMR 21.3, 24.8, 25.7, 25.9, 27.3, 28.3, 37.6, 41.3, 43.7, 69.9, 120.5.

**2-Propyl-1,2,3,4,6,7,8,8a-octahydroisoquinoline-5-carbonitrile (7e):** The general procedure was employed with **4e** (83.2 mg, 0.374 mmol), with the modification that the solution was heated at reflux for 3h, rather than 5 h, followed by addition of  $\text{NaHCO}_3$  rather than  $\text{NH}_4\text{Cl}$ , to afford,, after chromatography (1:5 EtOAc/hexanes, 1 mm plate), 46.9 mg (61%) of **7e** as an oil: IR (Film) 2209, 1639  $\text{cm}^{-1}$ ;  $^1\text{H}$  NMR 0.90 (t,  $J = 7$  Hz, 3H), 1.13-1.22 (m, 1H), 1.51 (sext,  $J = 7$  Hz, 2H), 1.65 (t,  $J = 11$  Hz, 2H), 1.72-1.83 (m, 2H), 1.90-2.03 (m, 1H), 2.15-2.42 (m, 6H), 2.99 (d,  $J = 6.6$  Hz, 1H), 3.02-3.06 (m, 2H);  $^{13}\text{C}$  NMR 11.8, 20.1, 20.5, 26.4, 27.4, 32.9, 37.3, 53.7, 59.9, 60.4, 105.0, 118.6, 156.3; MS  $m/e$  205 (M + H).

**5,7,7-Trimethyl-2,3,4,6,7,8-hexahydronaphthalene-1-carbonitrile (7f):** The general procedure was employed using potassium *iso*-butoxide, prepared by adding neat *iso*-butanol (35.9 mg, 0.484 mmol) to a rt, THF washed suspension (5 mL) of KH (16.4 mg, 0.409 mmol). After 15 minutes a THF solution (1 mL) of **4f** (17.6 mg, 0.0857 mmol) was slowly added, followed by refluxing, to afford, after chromatography (1:9 EtOAc/hexanes, 1 mm plate), 9.8 mg (61%) of **7f** as an oil: IR (film) 2199, 1624, 1590  $\text{cm}^{-1}$ ;  $^1\text{H}$  NMR 0.92 (s, 6H), 1.68 (pent,  $J = 6.0$  Hz, 2H), 1.75 (s, 3H), 2.01 (s, 2H), 2.29-2.34 (m, 4H), s, 2H),  $^{13}\text{C}$  NMR 20.1, 21.9, 25.2, 27.8, 27.9, 30.6, 43.4, 47.2, 103.4, 120.4, 125.5, 137.0, 149.6; MS  $m/e$  202 ( $M + 1$ ).

**3-Oxo-1,2,3,5,6,7-hexahydroindolizine-8-carbonitrile (7g):** The general procedure was employed with **4g** (53.4 mg, 0.298 mmol) and modified by adding 10% aqueous HCl, rather than  $\text{NH}_4\text{Cl}$ . After 30 min, solid  $\text{K}_2\text{CO}_3$  was added until the solution was neutral and then saturated, aqueous  $\text{NaHCO}_3$  was added to afford, after chromatography (1:5 EtOAc/hexanes, 1 mm plate), 29.8 mg (62%) of **7g** as an oil exhibiting IR and  $^1\text{H}$  NMR spectra identical to that previously reported<sup>9</sup>:  $^{13}\text{C}$  NMR 19.6, 23.1, 23.3, 28.1, 38.8, 80.9, 118.8, 154.2, 174.8.

**3,4,6,7,8,9-Hexahydro-2H-quinolizine-1-carbonitrile (7h):** The general procedure was employed with **4h** (122.6 mg, 0.680 mmol) to provide, after chromatography (1:5 EtOAc/hexanes, 1 mm plate), 66.4 mg (60%) of **7h** that was spectrally identical to material previously synthesized.<sup>10</sup> Alternative cyclization with KH: A THF solution (100 mL) of **7h** (899.1 mg, 5.00 mmol) was slowly added to a THF-washed slurry of KH (600.1 mg, 14.98 mmol) followed by heating the resulting mixture to reflux. After 5 h, the solution was cooled, saturated, aqueous,  $\text{NH}_4\text{Cl}$  was added, the organic phase was separated, and the aqueous phase was extracted with  $\text{CH}_2\text{Cl}_2$ . The combined organic extracts were dried ( $\text{Na}_2\text{SO}_4$ ), concentrated

under reduced pressure, and then purified by radial chromatography (1:5 EtOAc/hexanes, 4 mm plate) to afford 511.1 mg (63%) of **8h** spectrally identical to material previously synthesized.<sup>10</sup>

**(2, 5-Dimethyl-1-cyclopentenyl)-1-carboxamide (11i):** Potassium *tert*-butoxide (1.0 M in *t*-butanol, 0.55 mmol) was added to a stirred, room temperature, *t*-BuOH solution (8 mL) of **4i** (76 mg, 0.55 mmol). After 8 h aqueous saturated ammonium chloride was added. The reaction mixture was extracted with EtOAc, the extracts were washed with brine, dried over MgSO<sub>4</sub>, and then the solvent was removed under reduced pressure. Radial chromatography of the crude product (1 mm silica gel plate, 4:6 EtOAc:hexanes) afforded 41 mg (54%) of **11j** as crystals upon concentration of the appropriate fractions under reduced pressure. M.P: 65-69 °C; IR (film): 3354, 3160, 2931, 1629, 1500 cm<sup>-1</sup>; <sup>1</sup>H NMR 1.08 (d, *J* = 6.7 Hz, 3H), 2.04 (s, 3H), 2.07-2.25 (m, 2H), 2.33 (br ddd, *J* = 21, 14, 7 Hz, 1H), 2.61 (dd, *J* = 16, 8 Hz, 1H), 2.77 (dd, *J* = 12.9, 8 Hz, 1H); <sup>13</sup>C NMR 21.1, 28.1, 30.1, 38.9, 42.7, 105.5, 162.6, 195.7; GC/MS: *m/e* 140 (MH).

~~BRUKER~~

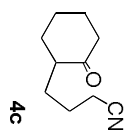

RAMA811.001  
DATE 11-8-99  
TIME 17:05

SA.NO TEMP 101  
SOLVENT CC13  
SF 300.133  
SY 210.0  
O1 4800.000  
SI 16384  
TD 16384  
SM 4504.505  
HZ/PT .550  
PM 5.0  
RD 2.500  
AQ 1.819  
RG 4  
NS 8  
TE 297  
FW 5700  
O2 5684.205  
DP 4L P0  
LB 0.0  
GB .100  
CX 25.00  
CY 10.00  
F1 10.001P  
F2 .198P  
HZ/CM 122.444  
PPM/CM 408  
SR 3367.75

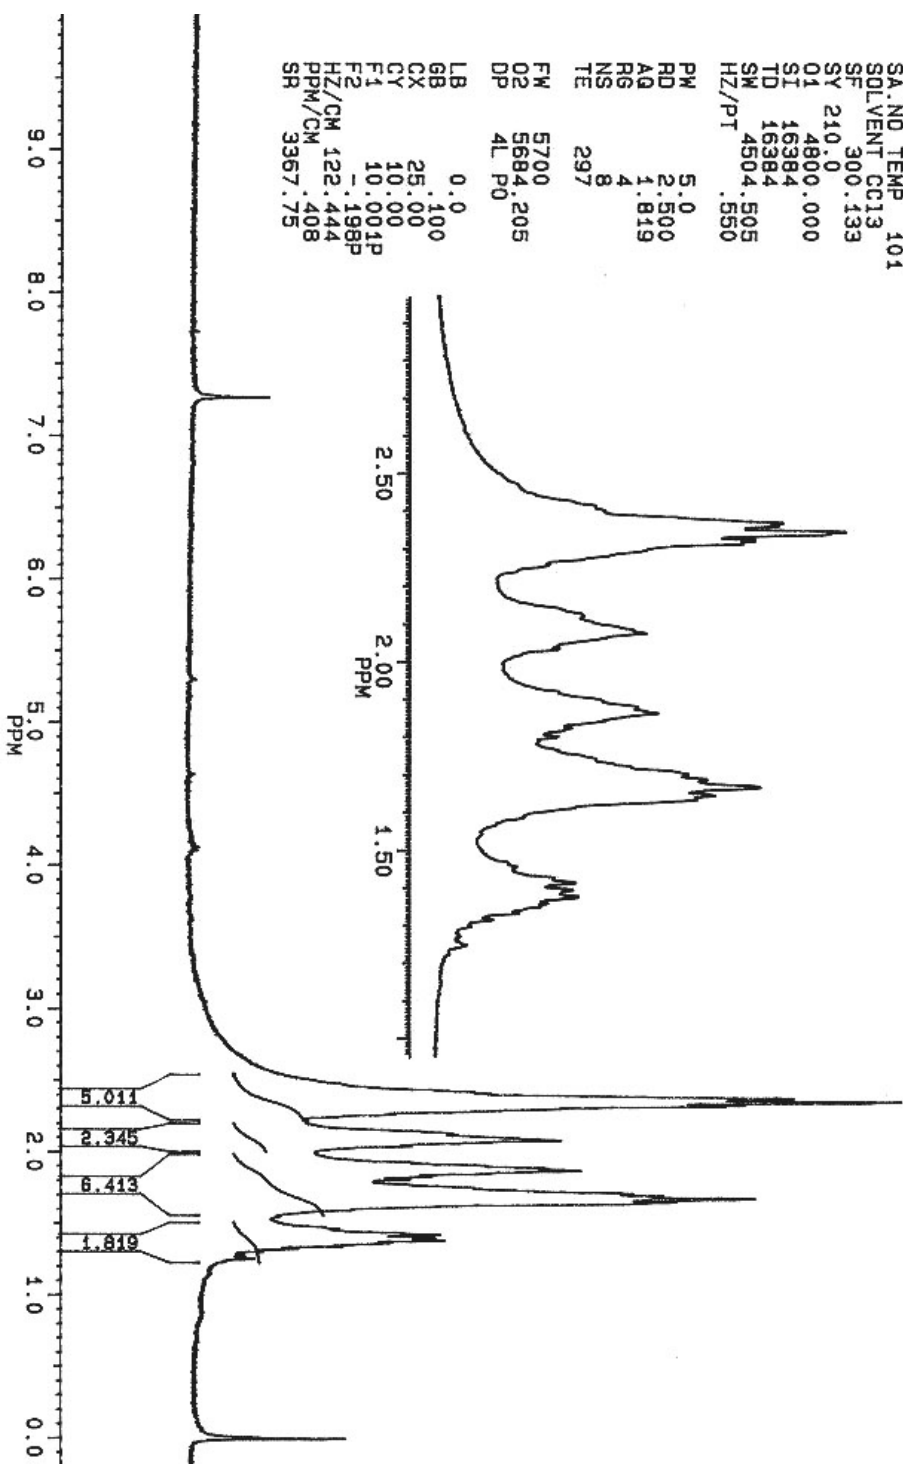

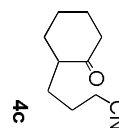

  
 PPM  
 RAN4811.101  
 DATE 11-8-99  
 TIME 16:19

SOLVENT CDCl3  
 SF 75.0  
 SY 75.0  
 01 6147.202  
 SI 16384  
 TD 16384  
 SM 17657.143  
 HZ/PT 2.160

PM 4.0  
 RD 3.000  
 AG .452  
 RG 160  
 NS 243  
 TE 237

FM 22400  
 02 4004.452  
 DP 20H BB

LB 0.0  
 GB 0.0  
 CX 25.00  
 CY .50  
 F1 220.015P  
 F2 -48.4P  
 HZ/CW 665.632  
 PPM/CW 8.820  
 SR -1336.64

118.723

76.850  
 76.494  
 76.002

48.880

41.087

39.137

27.787

26.684

23.681

22.272

16.298

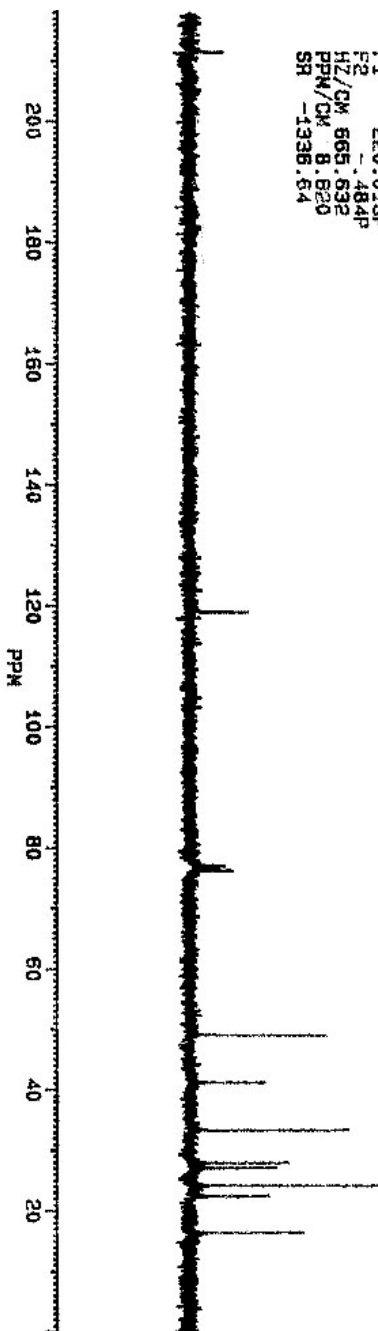

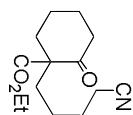

Ethyl 1-(4-cyanobutyl)-2-oxocyclohexanecarboxylate

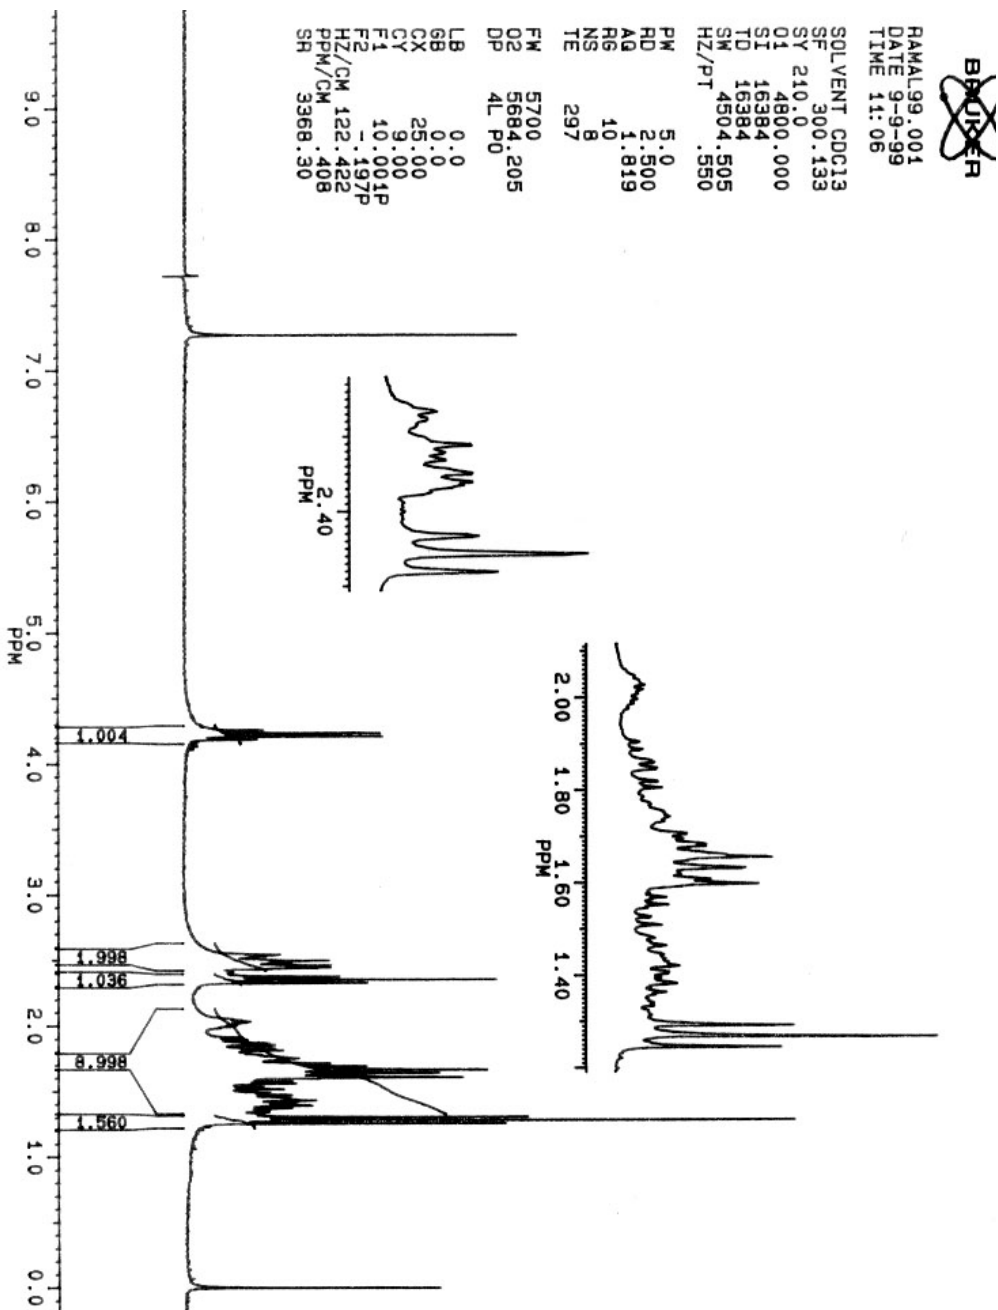

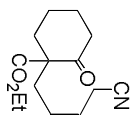

Ethyl 1-(4-cyanobutyl)-2-oxocyclohexanecarboxylate

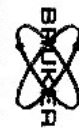

RAMAL99.101  
DATE 11-9-99  
TIME 15:18

PPM

171.653

119.345

77.433  
77.001  
76.571

61.172  
60.449

40.897

36.072  
33.675

27.406

25.559

23.363

22.410

16.719

14.004

SOLVENT CDCl3  
SF 75.0  
SY 6147.202  
O1 16384  
SI 16384  
TD 16384  
SM 17857.143  
HZ/Pt 2.180  
PM 4.0  
RD 3.000  
AQ 459  
RG 200  
NS 21344  
TE 297  
FW 22400  
U2 4004.452  
DP 20H BB  
LB 0.0  
GB 0.0  
CX 25.00  
CY 220.50  
F1 220.004P  
F2 495P  
HZ/CW 665.632  
PPM/CW 8.820  
SR -1396.84

200 180 160 140 120 100 80 60 40 20 PPM



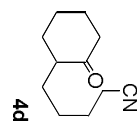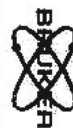

RAMAL106.001  
DATE 7-10-99  
TIME 11:54

SOLVENT CDCl3  
SF 300.133  
SY 210.0  
O1 4800.000  
SI 16384  
TO 16384  
SM 4504.505  
HZ/PT .550

PW 5.0  
RD 2.500  
RG 1.819  
NS 8  
TE 297

FV 5700  
O2 5684.205  
DP 4L P0

LB 0.0  
GB 0.0  
CX 25.00  
CY 8.00  
F1 10.001P  
F2 ~.197P  
HZ/CM 122.422  
PPM/CM 3367.75  
SR

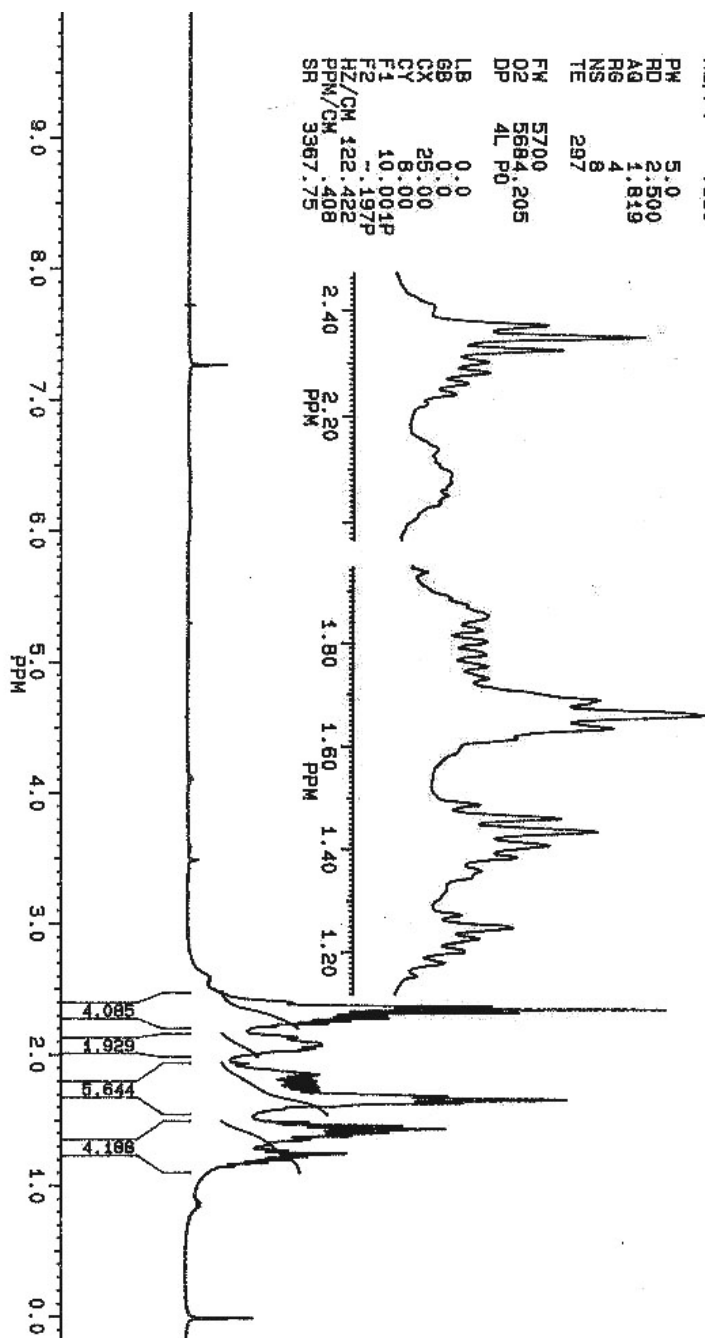

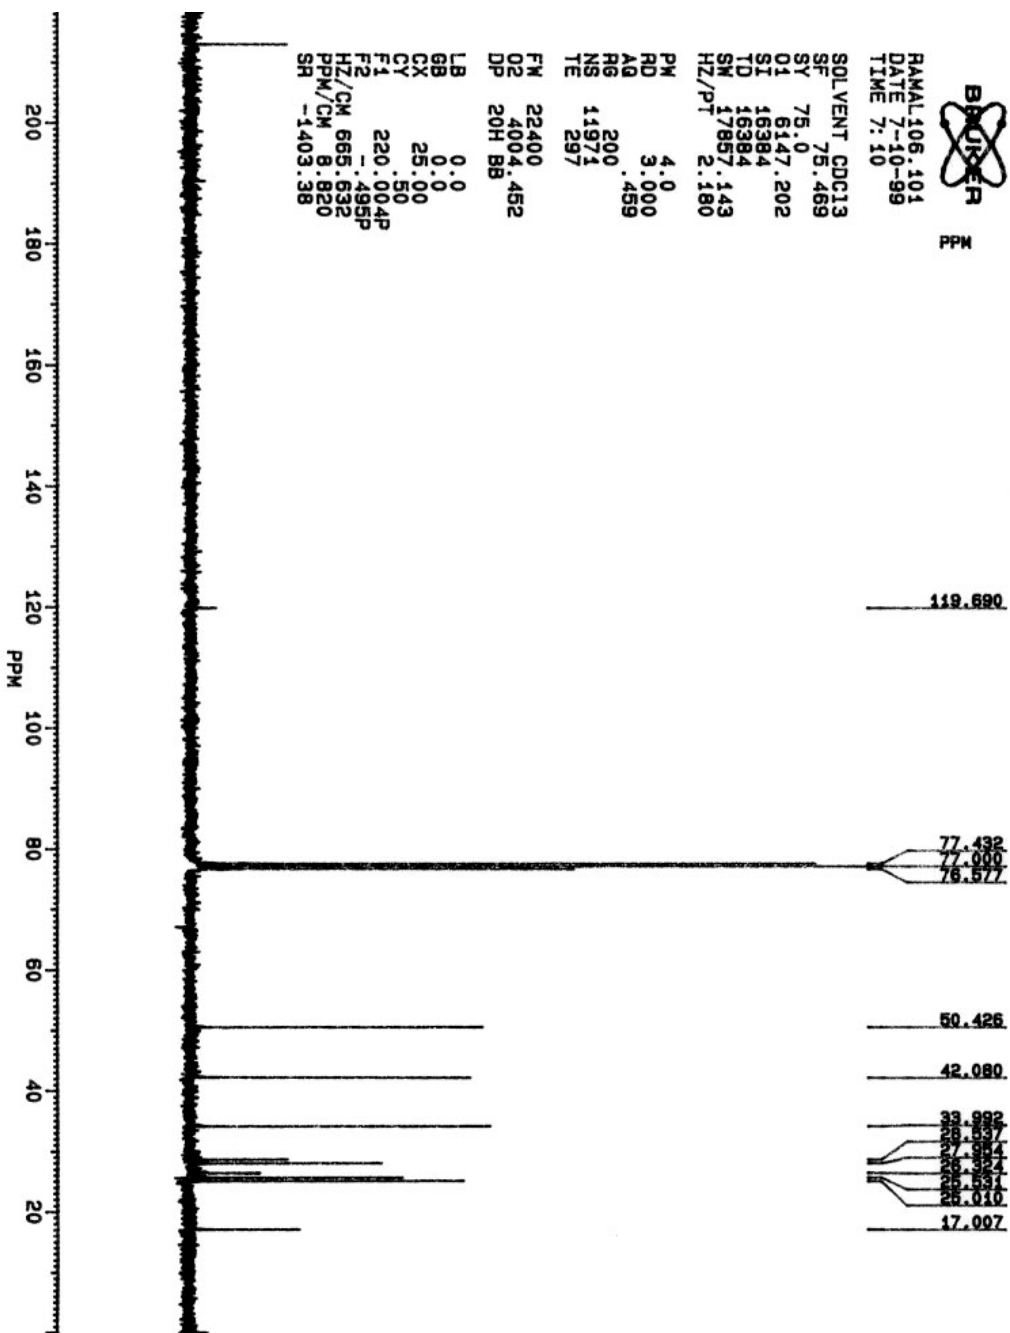

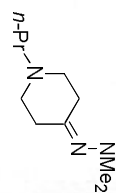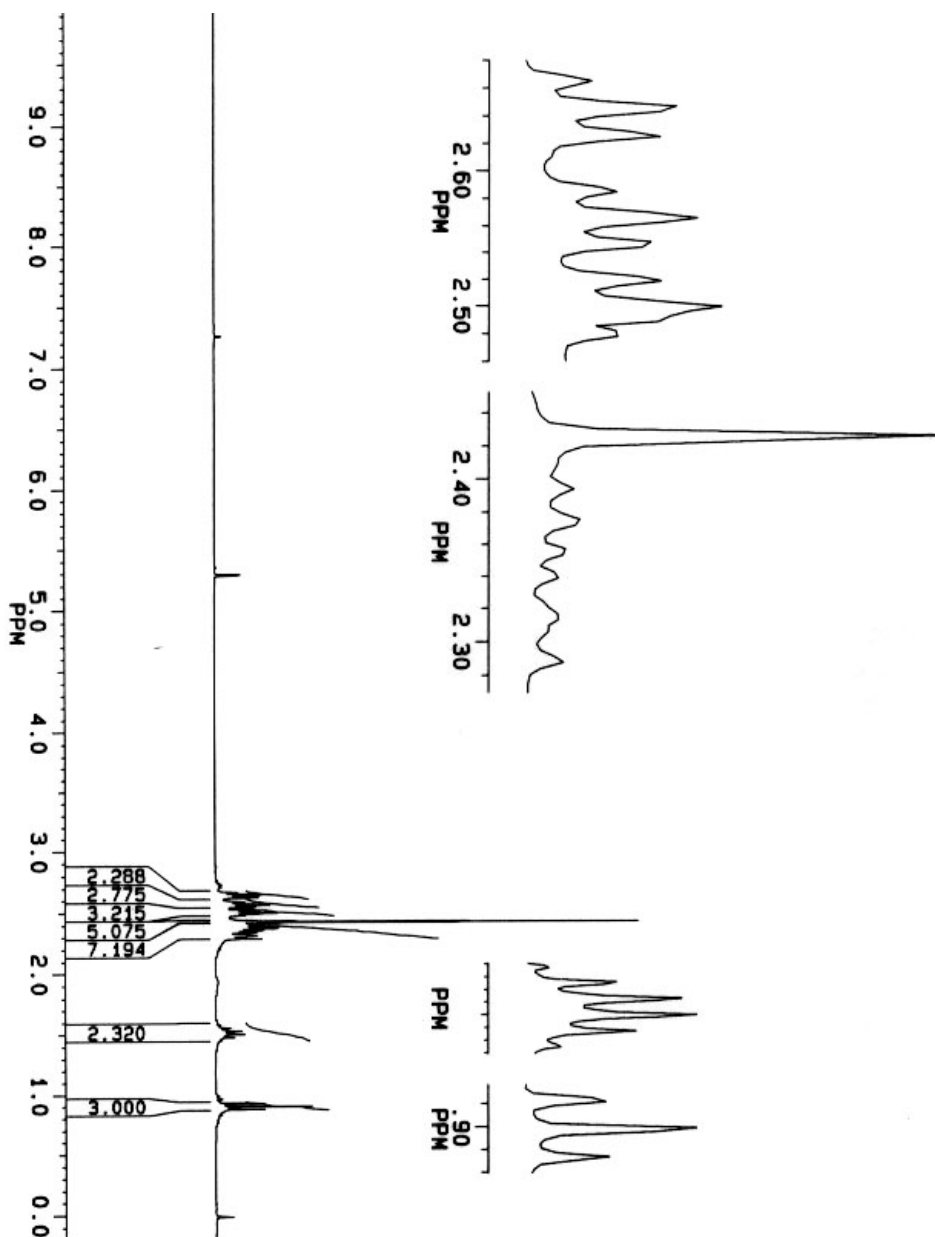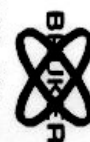

FFLF2.001  
 DATE 19-10-0  
 SF 300.133  
 SY 210.0  
 O1 4800.000  
 SI 8192  
 TD 8192  
 SM 4504.505  
 HZ/PT 1.100  
 PM 5.0  
 RD 2.500  
 AG .909  
 RG 4  
 NS 8  
 TE 297  
 FM 5700  
 O2 5684.205  
 DP 4L PO  
 LB 0.0  
 GB 0.0  
 CX 20.50  
 CY 7.00  
 F1 10.001P  
 F2 .200P  
 HZ/CM 149.349  
 PPM/CM .498  
 SR 3368.85

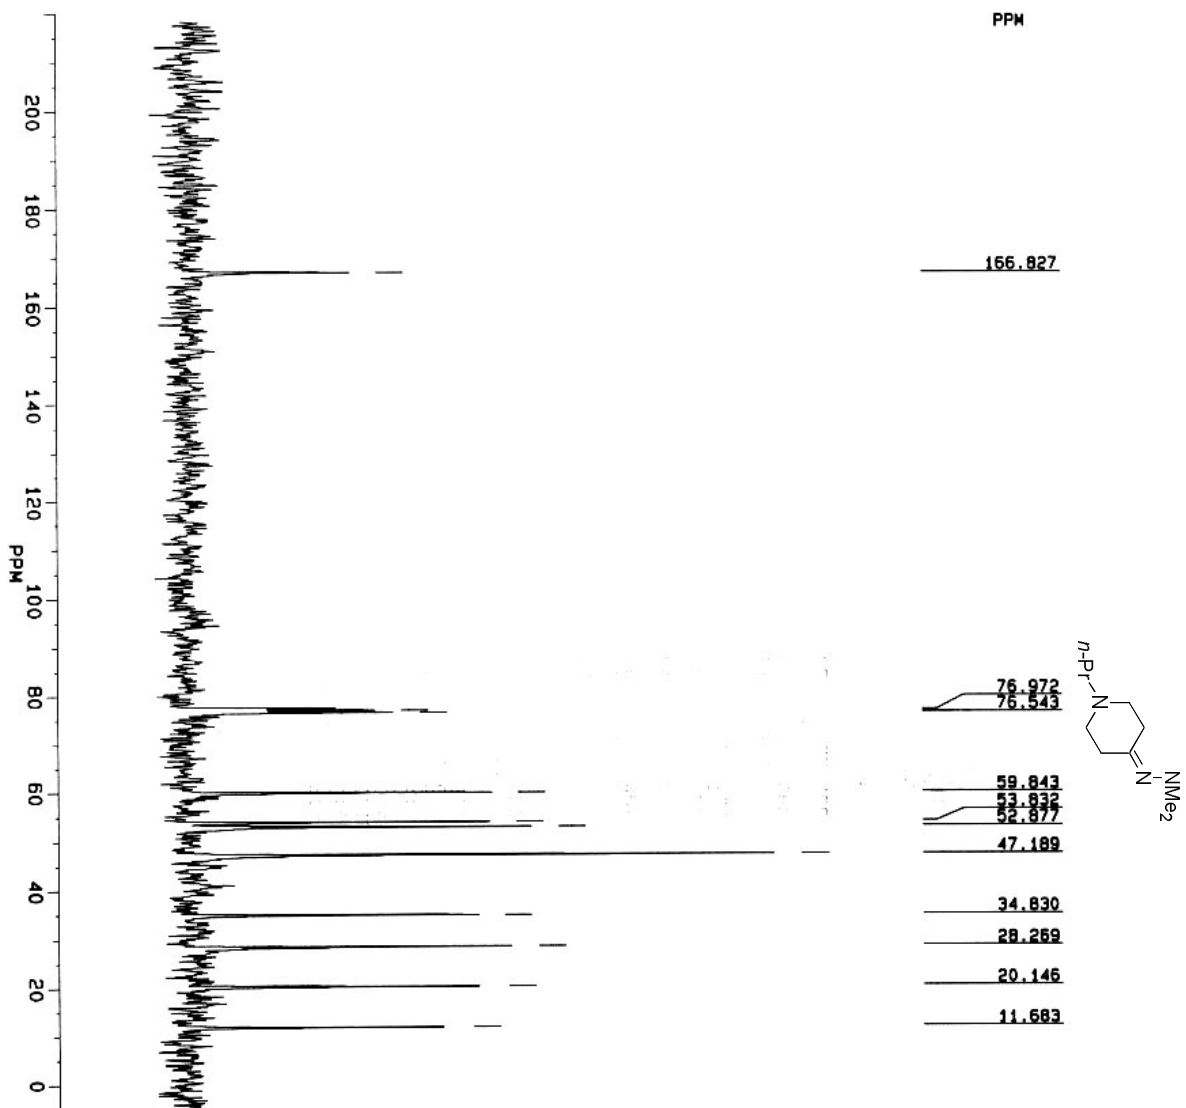

F.001  
 DATE 1-3-96  
 SF 75.469  
 SY 75.0  
 O1 6147.202  
 SI 16384  
 TD 16384  
 SM 17857.143  
 HZ/PT 2.180  
 PM 4.0  
 RD 3.000  
 AG .459  
 RG 200  
 NS 74  
 TE 297  
 FM 22400  
 O2 4004.452  
 DP 20H BB  
 LB 10.000  
 GB 0.0  
 CX 20.50  
 CY 10.00  
 F1 220.004P  
 F2 -5.001P  
 HZ/CM 828.334  
 PPM/CM 10.976  
 SR -1394.66

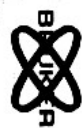

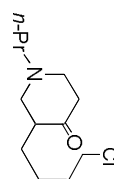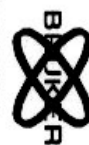

FFLE33.001  
DATE 24-10-0

SF 300.133  
SY 210.0  
O1 4800.000  
SI 8192  
TD 8192  
SM 4504.505  
HZ/PT 1.100

PM 5.0  
RD 2.500  
AQ .909  
RG 4  
NS 8  
TE 297

FM 5700  
O2 5684.205  
DP 4L P0

LB 0.0  
GB 0.0  
CX 20.50  
CY 5.00  
F1 10.001P  
F2 -200P  
HZ/CM 149.349  
PPM/CM .498  
SR 3367.75

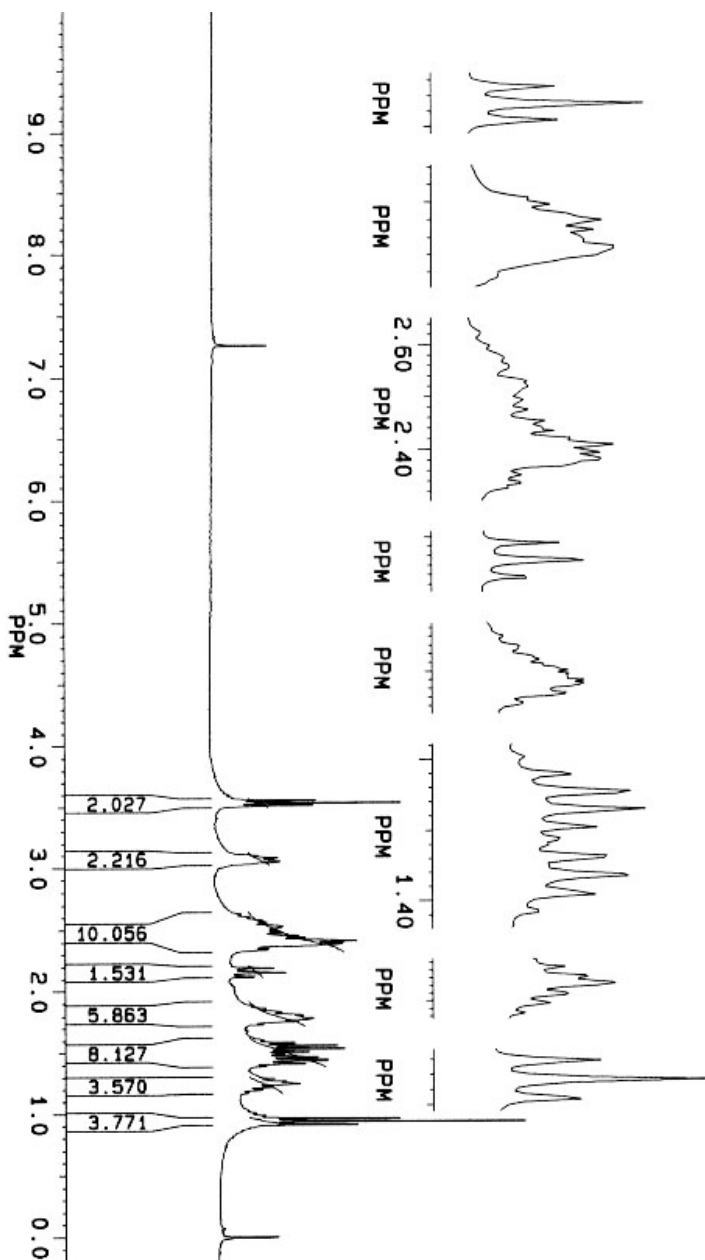

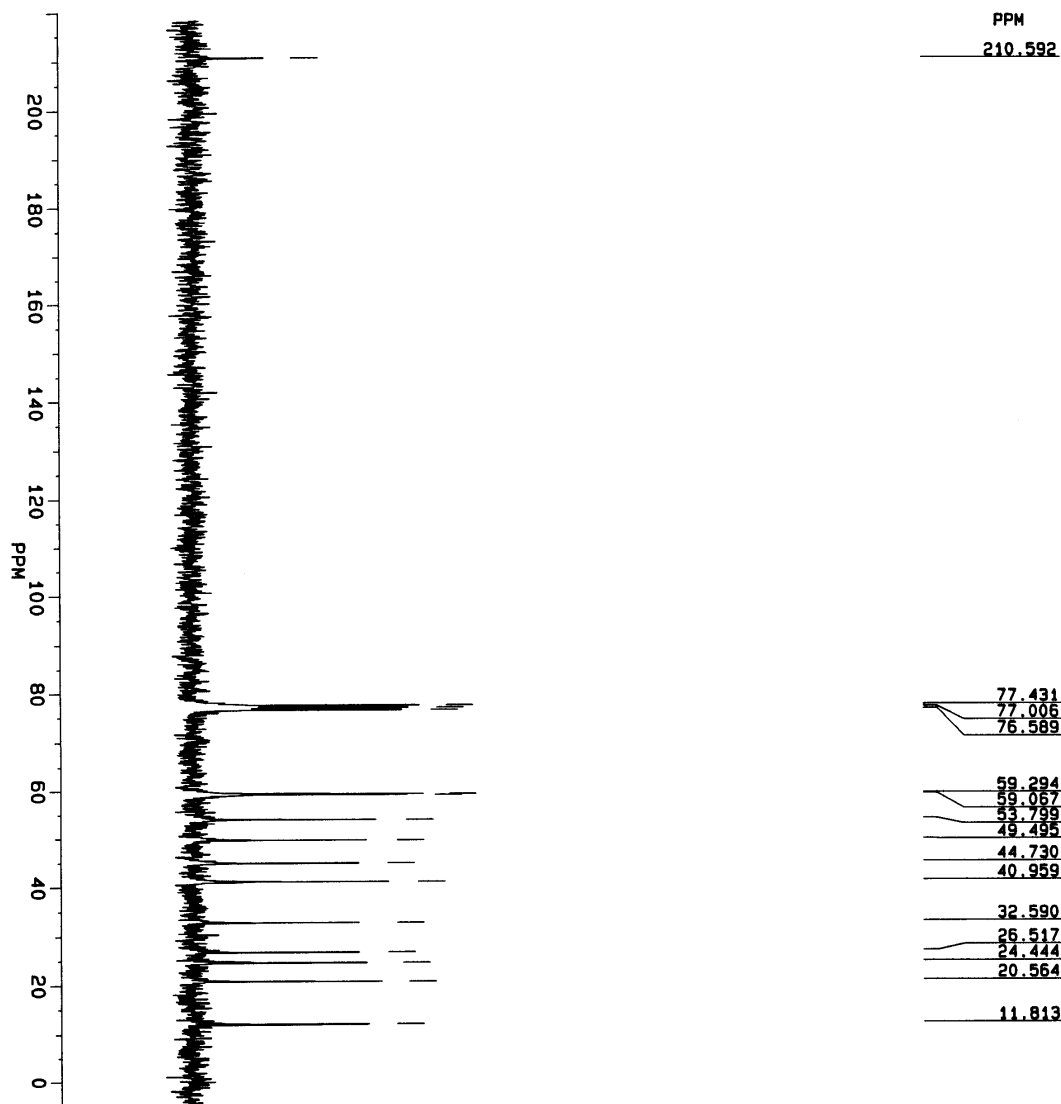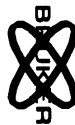

FFLF100.001  
DATE 1-3-96

SF 75.469  
SY 75.0  
O1 6147.202  
SI 16384  
TD 16384  
SW 17857.143  
HZ/PT 2.180

PM 4.0  
RD 3.000  
AQ .459  
RG 200  
NS 564  
TE 297

FM 22400  
O2 4004.452  
DP 20H 88

LB 4.000  
GB 0.0  
CX 20.50  
CY 4.00  
F1 220.004P  
F2 -5.001P  
HZ/CM 828.334  
PPM/CM 10.976  
SR -1403.38

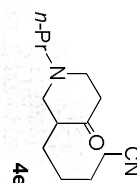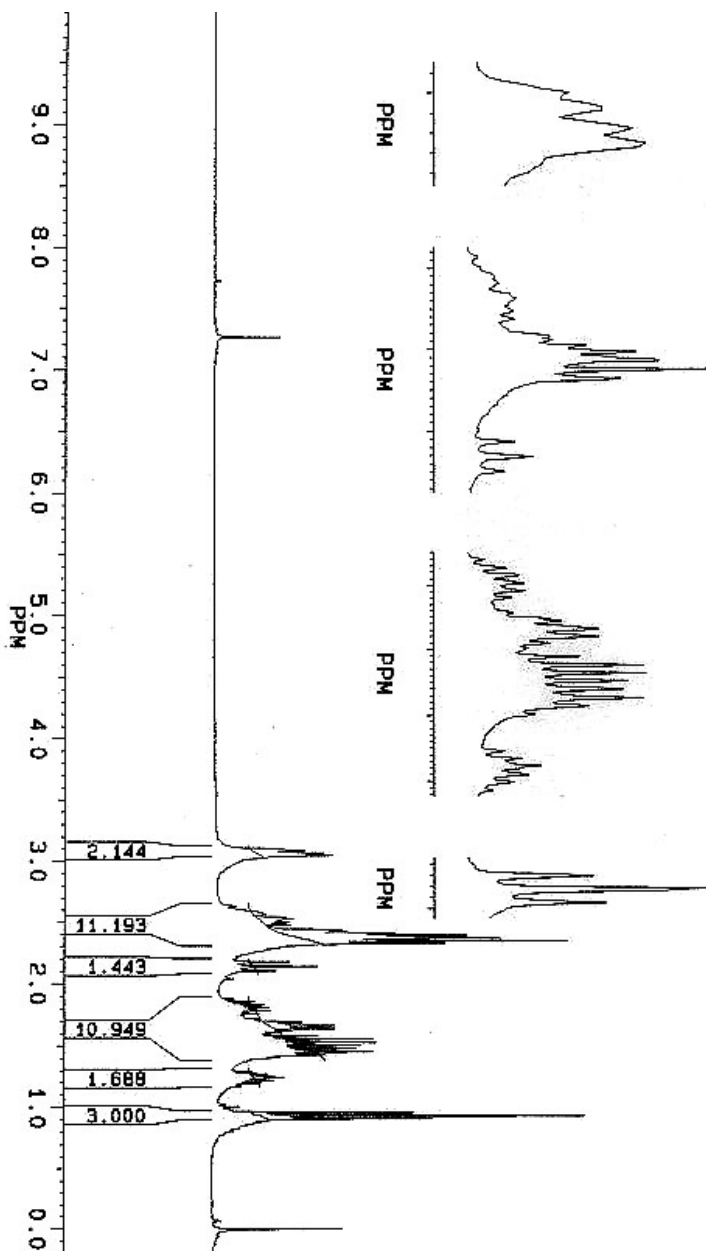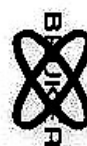

FFLEB.001  
 DATE 21-11-0  
 SF 300.133  
 SY 210.0  
 O1 4800.000  
 S1 8192  
 T0 8192  
 SM 4504.505  
 HZ/PT 1.100  
 PM 5.0  
 RD 2.500  
 AG 4.909  
 RG 8  
 NS 8  
 TE 297  
 FM 5700  
 O2 5684.205  
 DP 4L P0  
 LB 0.0  
 GB 0.0  
 CX 20.50  
 CY 6.00  
 F1 10.003P  
 F2 -200P  
 HZ/CM 149.349  
 PPM/CM 498  
 SR 3367.75

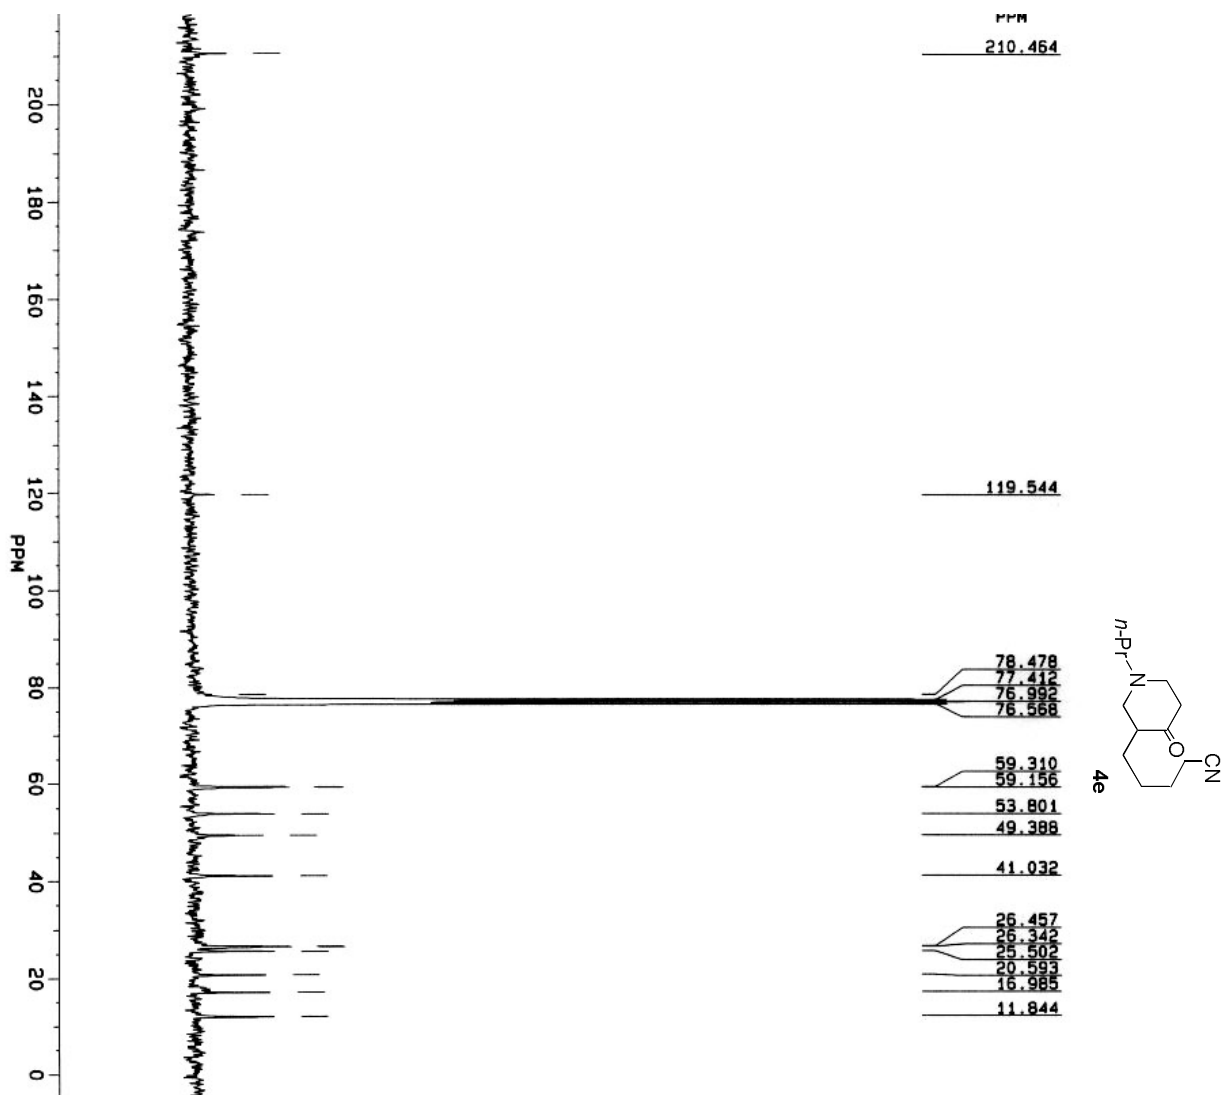

BF<sub>3</sub>·OEt<sub>2</sub>  
 FFLFB.002  
 DATE 22-11-0  
 SF 75.469  
 SY 75.0  
 O1 6147.202  
 S1 16384  
 TD 16384  
 SM 17857.143  
 HZ/Pt 2.180  
 PW 4.0  
 RD 3.000  
 AG .459  
 RG 200  
 NS 9190  
 TE 297  
 FW 22400  
 O2 4004.452  
 DP 20H BB  
 LB 8.000  
 GB 0.0  
 CX 20.50  
 CY 14.50  
 F1 220.004P  
 F2 -5.001P  
 HZ/CM 828.334  
 PPM/CM 10.976  
 SR -1405.56



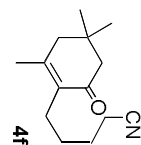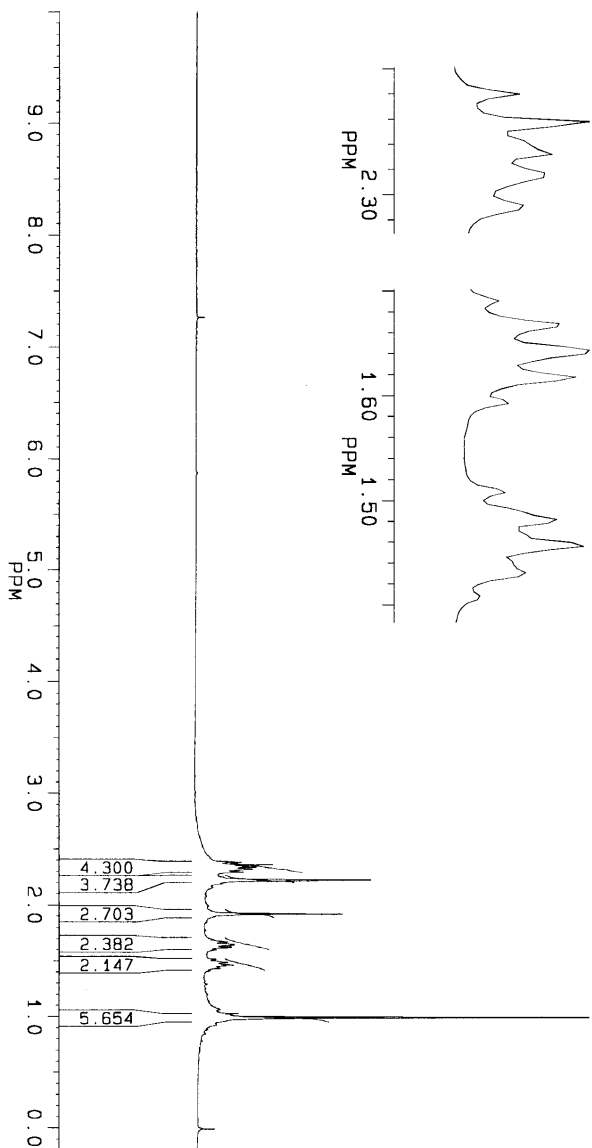

~~BRUKER~~  
 FFL17.001  
 DATE 2-2-1  
 SF 300.133  
 SY 210.0  
 O1 4800.000  
 SI 8192  
 TD 8192  
 SW 4504.505  
 HZ/PT 1.100  
 PM 5.0  
 RD 2.500  
 AG .909  
 RG 2  
 NS 8  
 TE 297  
 FW 5700  
 O2 5684.205  
 DP 4L P0  
 LB 0.0  
 GB 0.0  
 CX 20.50  
 CY 7.00  
 F1 10.001P  
 F2 .200P  
 HZ/CM 149.349  
 PM/CM .498  
 SR 3367.75

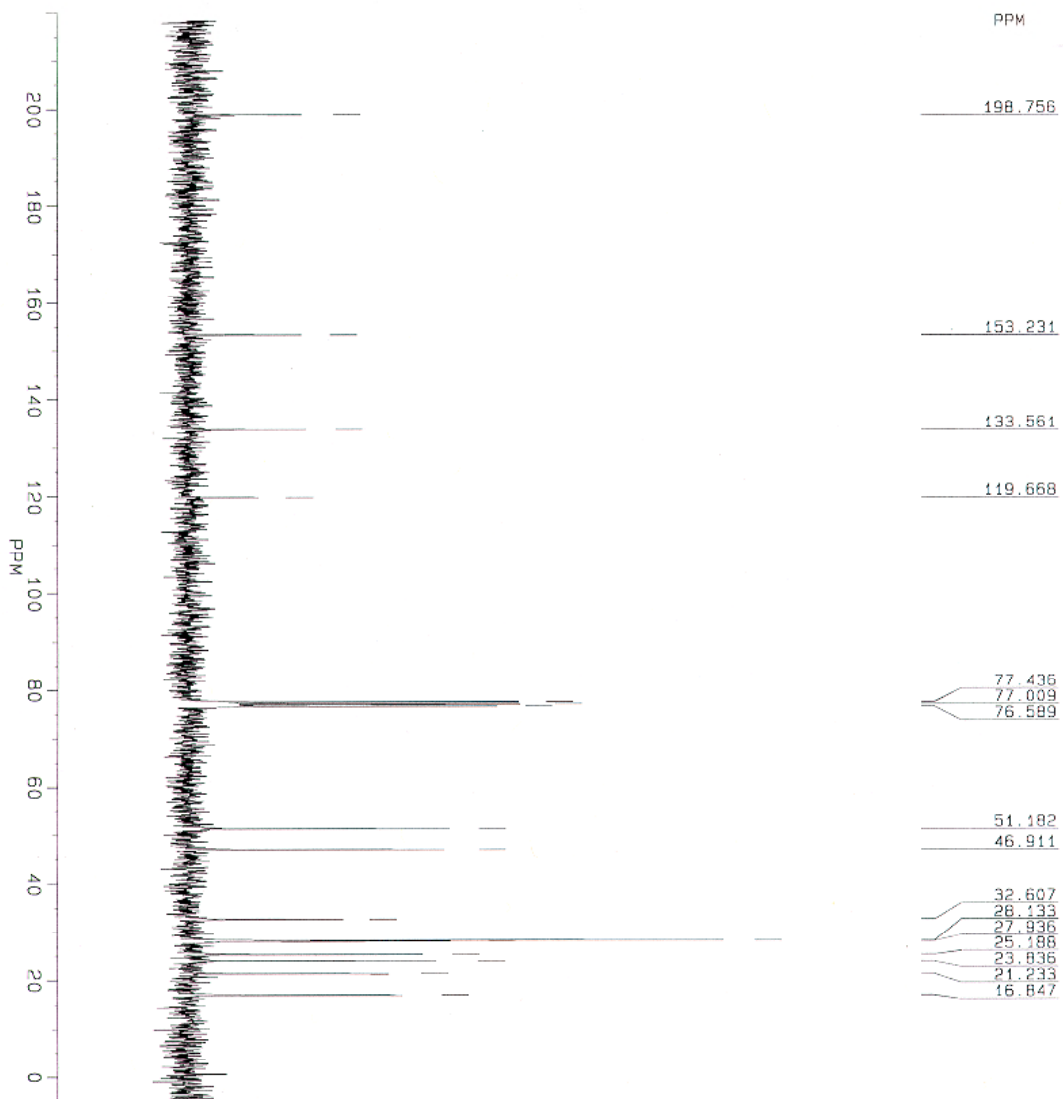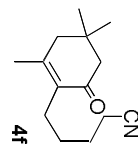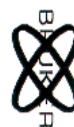

FFLF20.002  
DATE 22-1-1

SF 75.469  
SY 75.0  
O1 6147.202  
SI 16384  
TD 16384  
SW 17857.143  
HZ/PT 2.180  
PW 4.0  
RD 3.000  
AG 459  
RG 200  
NS 706  
TE 297  
FW 22400  
O2 4004.452  
DP 20H BB  
LB 2.000  
GB 0.0  
CX 20.50  
CY 10.00  
F1 220.004P  
F2 5.001P  
HZ/CM 828.334  
PPM/CM 10.976  
SR -1401.20

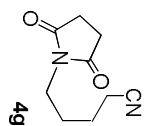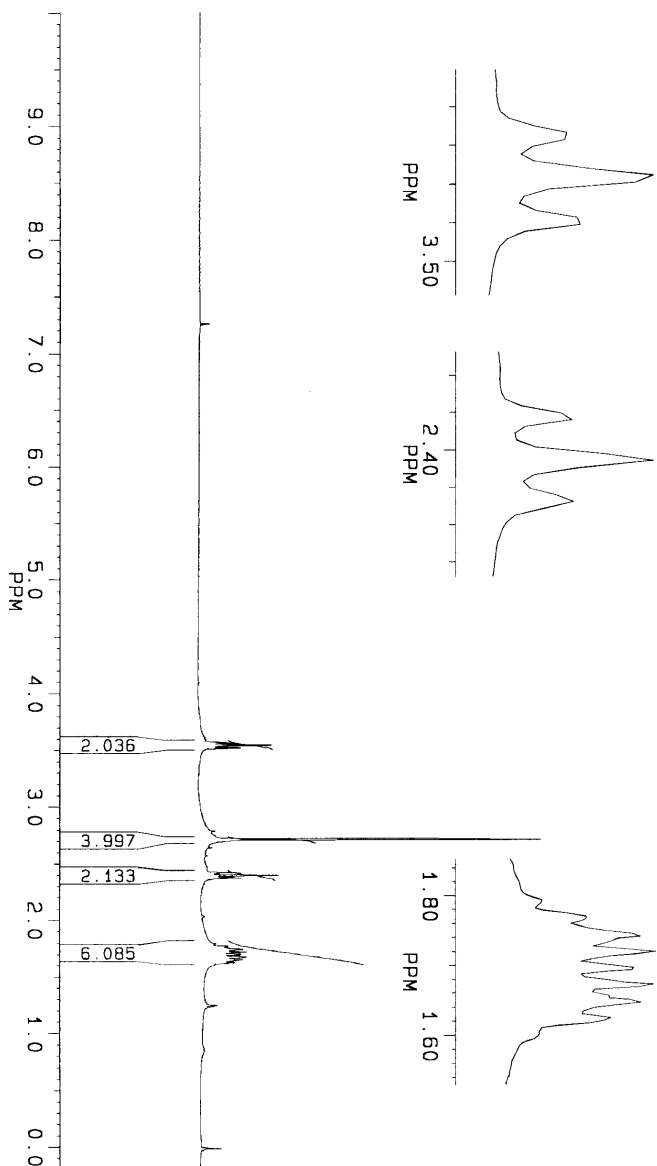

BMR  
 FFLF16.001  
 DATE 1-2-1  
 SF 300.133  
 SY 210.0  
 O1 4800.000  
 SI 8192  
 TD 8192  
 SW 4504.505  
 HZ/Pt 1.100  
 PM 5.0  
 RD 2.500  
 AG .909  
 RG 4  
 NS 8  
 TE 297  
 FM 5700  
 O2 5684.205  
 DP 4L P0  
 LB 0.0  
 GB 0.0  
 CX 20.50  
 CY 6.00  
 F1 10.004P  
 F2 .200P  
 HZ/CM 149.349  
 PPM/CM .498  
 SR 3367.75

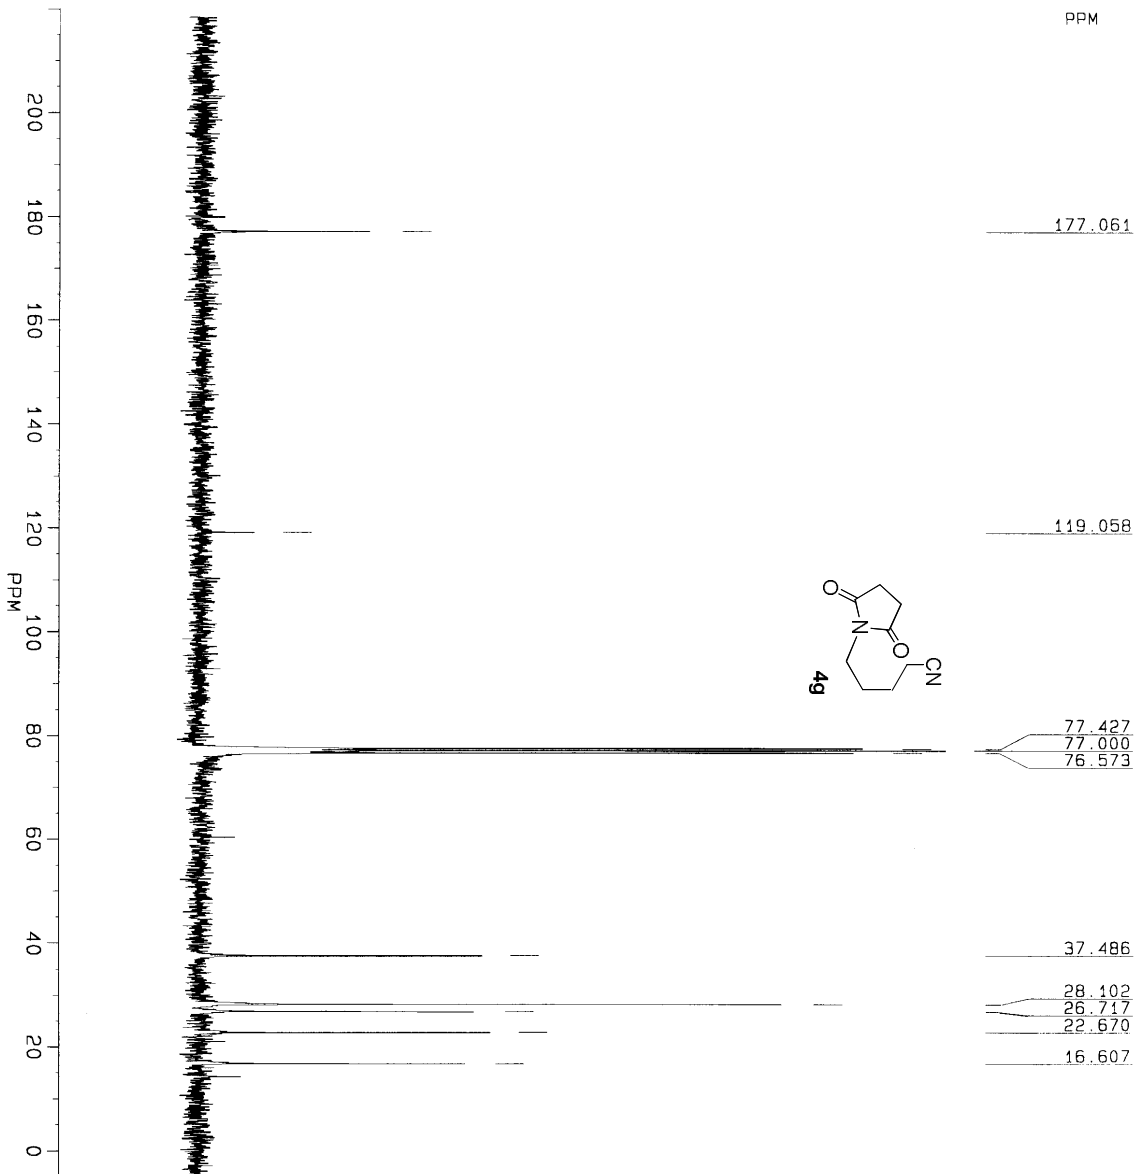

FFLF16.002  
DATE 26-1-1

SF 75.469  
SY 75.0  
O1 8147.202  
S1 16384  
TD 16384  
SW 17857.143  
HZ/PT 2.180

PM 4.0  
RD 3.000  
AQ .459  
RG 200  
NS 5367  
TE 297

FW 22400  
O2 4004.452  
DP 20H BB

LB 2.000  
GB 0.0  
CX 20.50  
CY 13.00  
F1 220.004P  
F2 -5.001P  
HZ/CM 828.334  
PPM/CM 10.976  
SR -1403.38

B  
X  
R

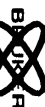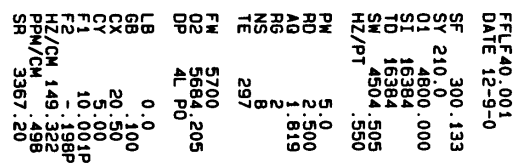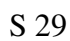

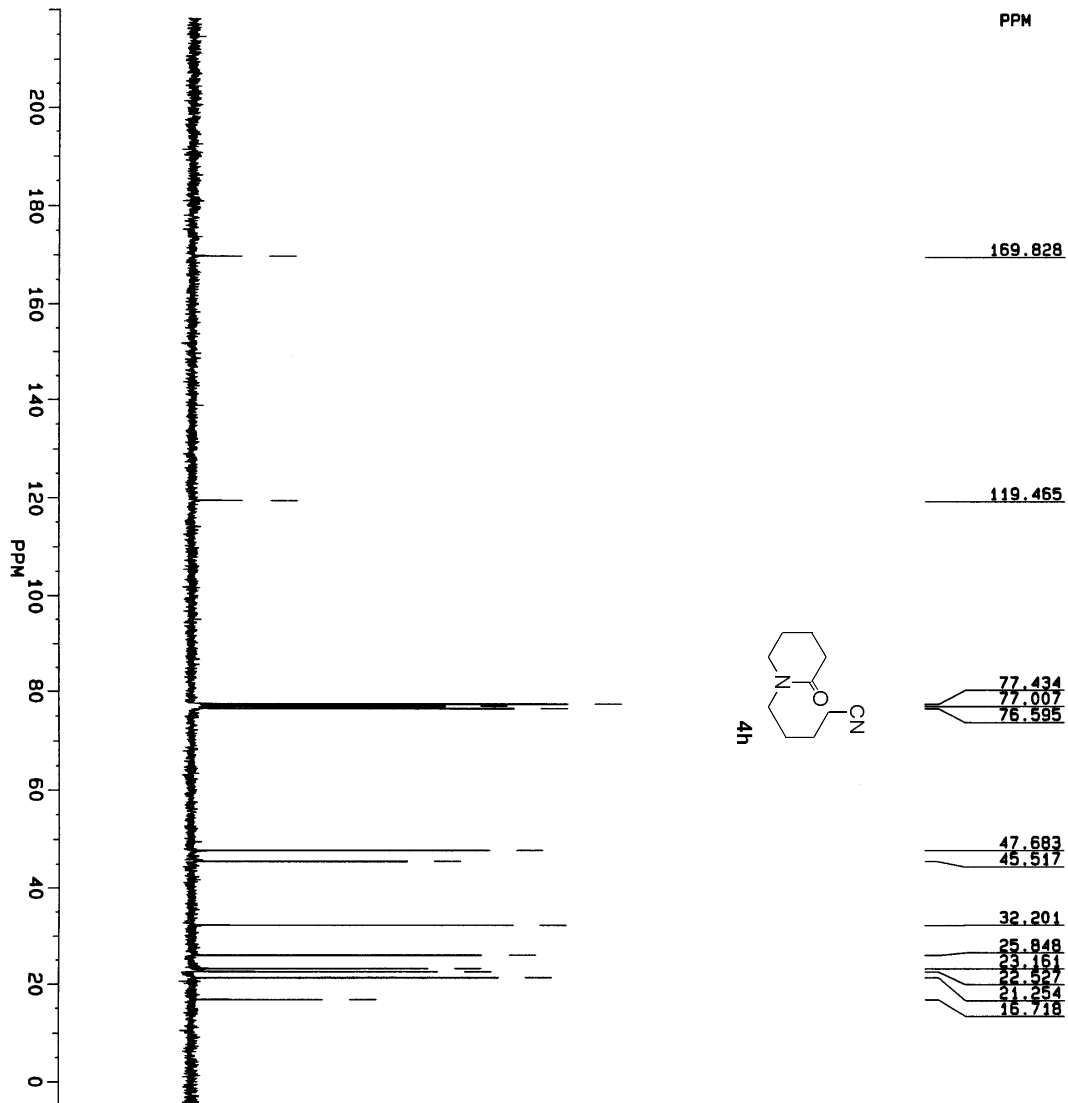

FFLF40.002  
DATE 12-9-0

SF 75.469  
SY 75.0  
O1 6147.202  
S1 16384  
TD 16384  
SW 17857.143  
HZ/PT 2.180

PM 4.0  
RD 3.000  
AQ .459  
RG 200  
NS 2922  
TE 297

FW 22400  
O2 4004.452  
DP 20H BB

LB .400  
GB 0.0  
CX 20.50  
CY 6.00  
F1 220.004P  
F2 -5.001P  
HZ/CM 828.334  
PPM/CM 10.976  
SR -1401.20

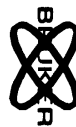



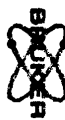

V06ARC13.012  
DATE 27-1-98  
TIME 17:26

SA NO TEMP 101  
SOLVENT CDCl3  
SF 78.0  
SI 8147.202  
SI 16384  
TD 16384  
SM 17857.143  
HZ/PT 2.180  
PM 4.0  
RD 3.000  
AB .459  
RG 200  
NS 1984  
TE 297  
FM 22400  
O2 4003.452  
DP 20H 9B  
LB 2.000  
GB .100  
CX 25.00  
CY 15.00  
F1 220.004P  
F2 -8.001P  
HZ/CM 678.234  
PPM/CM 9.000  
SR -1401.20

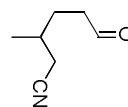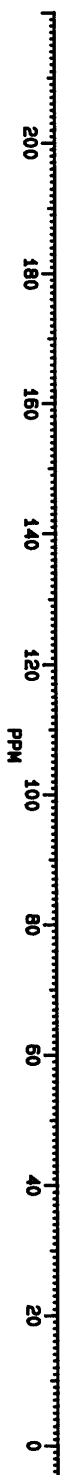



~~BUNEF~~

FLYA.004  
DATE 10-5-98  
TIME 11:42

SA, NO TEMP 101  
SOLVENT CDCl3  
SF 300.133  
SY 210.0  
O1 4800.000  
S1 16384  
TD 16384  
SH 4804.505  
HZ/PT .880

PM 5.0  
RD 2.800  
AG 1.819  
R8 200  
NS 16  
TE 287  
FW 5700  
O2 5684.205  
DP 4L P0

LB .200  
GB .100  
CX 25.00  
CY 15.00  
F1 10.004P  
F2 -488P  
HZ/CM 126.051  
PPM/CM 420  
SR 3367.75

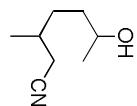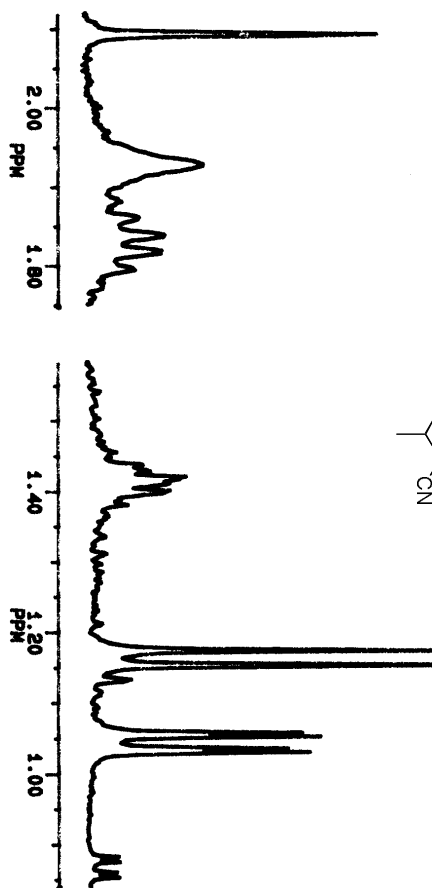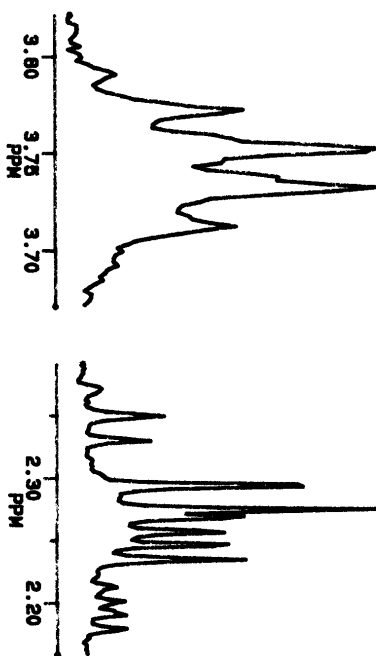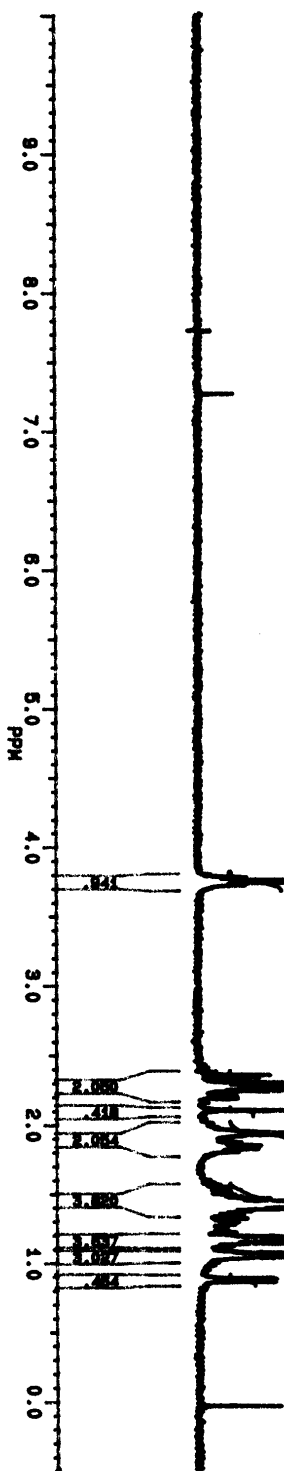

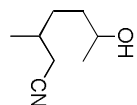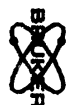

PPM

VACA.002  
DATE 11-5-98  
TIME 16:34

SA. NO TEMP 101

SOLVENT CCl3

SF 75.0

SI 61.47.202

TD 16384

SW 17867.143

HZ/PT 2.180

PM 4.0

RD 3.000

RS 200.459

NS 1425

TE 287

FV 22400

O2 4004.452

DP 20H BB

LB 3.000

CB 25.100

CY 15.00

F1 220.004P

F2 -5.001P

HZ/CM 678.234

PPM/CM 9.000

SR -1405.56

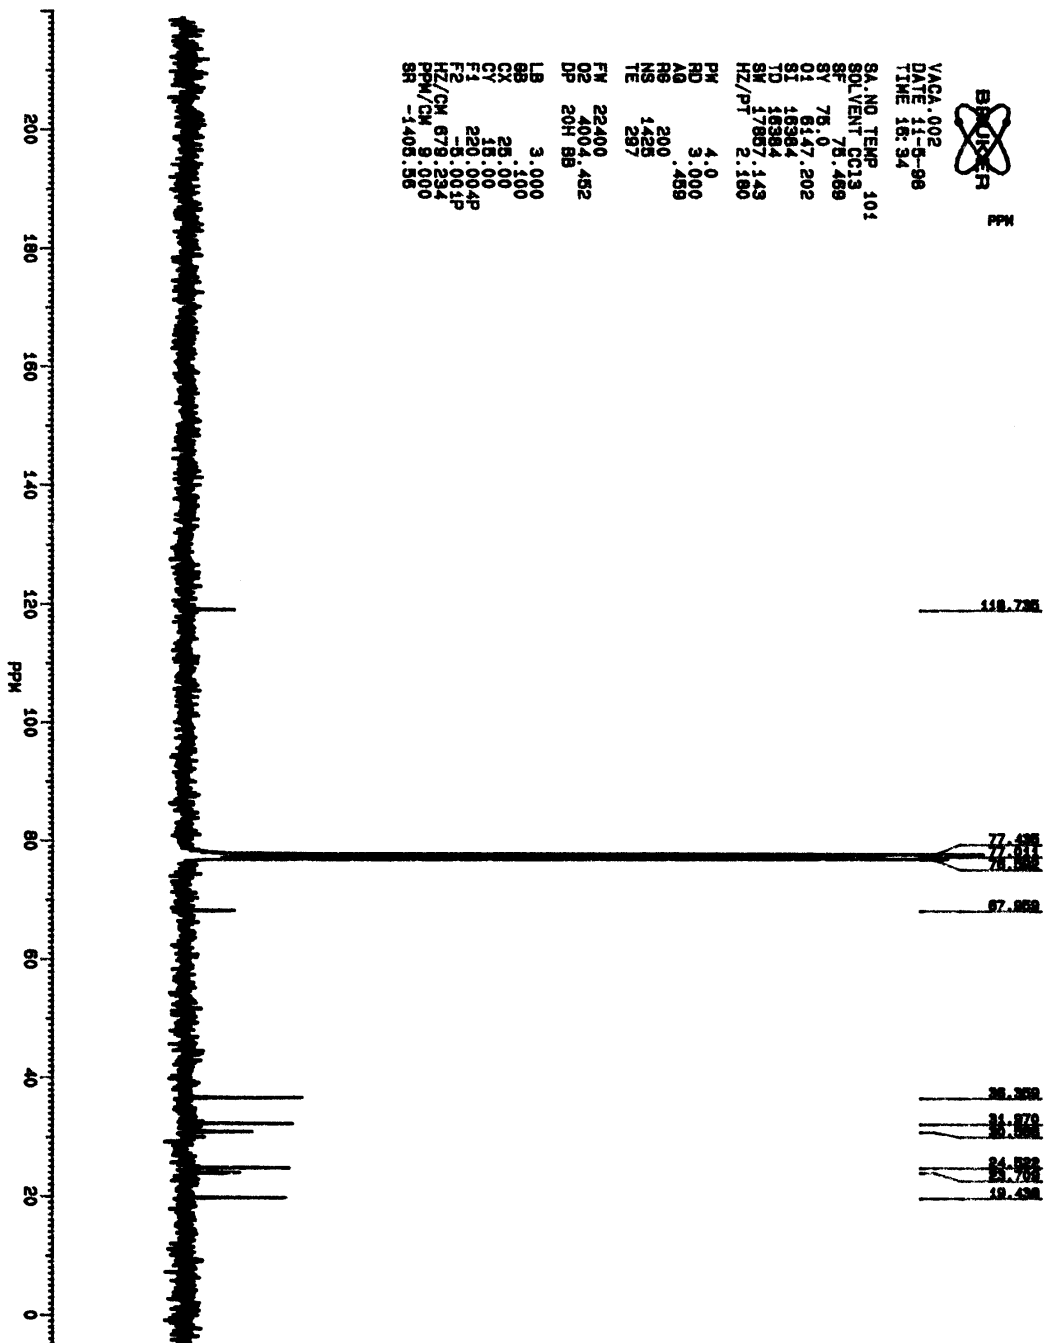

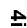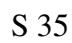

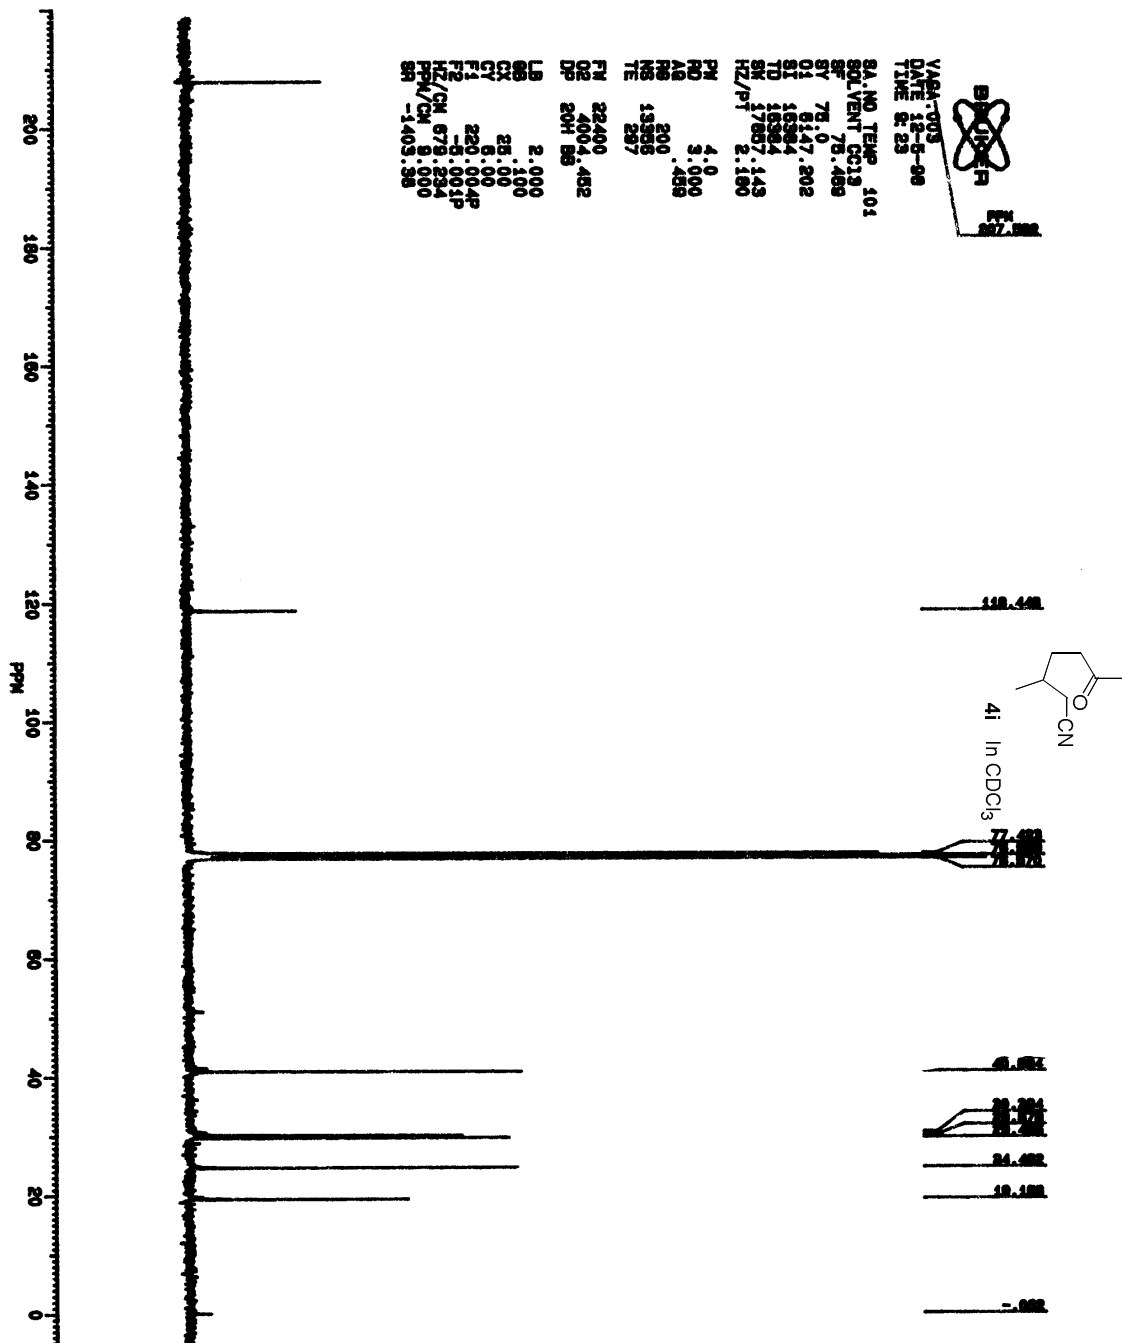

PPM  
207.845

|             |                   |
|-------------|-------------------|
| SA, ND TEMP | 10.1              |
| SOLVENT     | CDCl <sub>3</sub> |
| BF          | 75.468            |
| CF          | 75.0              |
| CI          | 81.7              |
| OT          | 81.7              |
| 91          | 168.4             |
| 92          | 168.4             |
| 10          | 168.4             |
| 11          | 168.4             |
| HZ/PT       | 143               |
|             | 2.160             |
| PM          | 4.0               |
| RD          | 5.000             |
| AB          | .468              |
| NS          | 200               |
| NR          | 13980             |
| TE          | 287               |
| FM          | 22400             |
| 02          | 400.4             |
| DP          | 201 BB            |
| LB          | .400              |
| CY          | 25.100            |
| CI          | 41.00             |
| F1          | 225.000P          |
| F2          | 225.000P          |
| HZ/CM       | 678.224           |
| PM/CM       | 5.000             |
| PR-1000     | .77               |

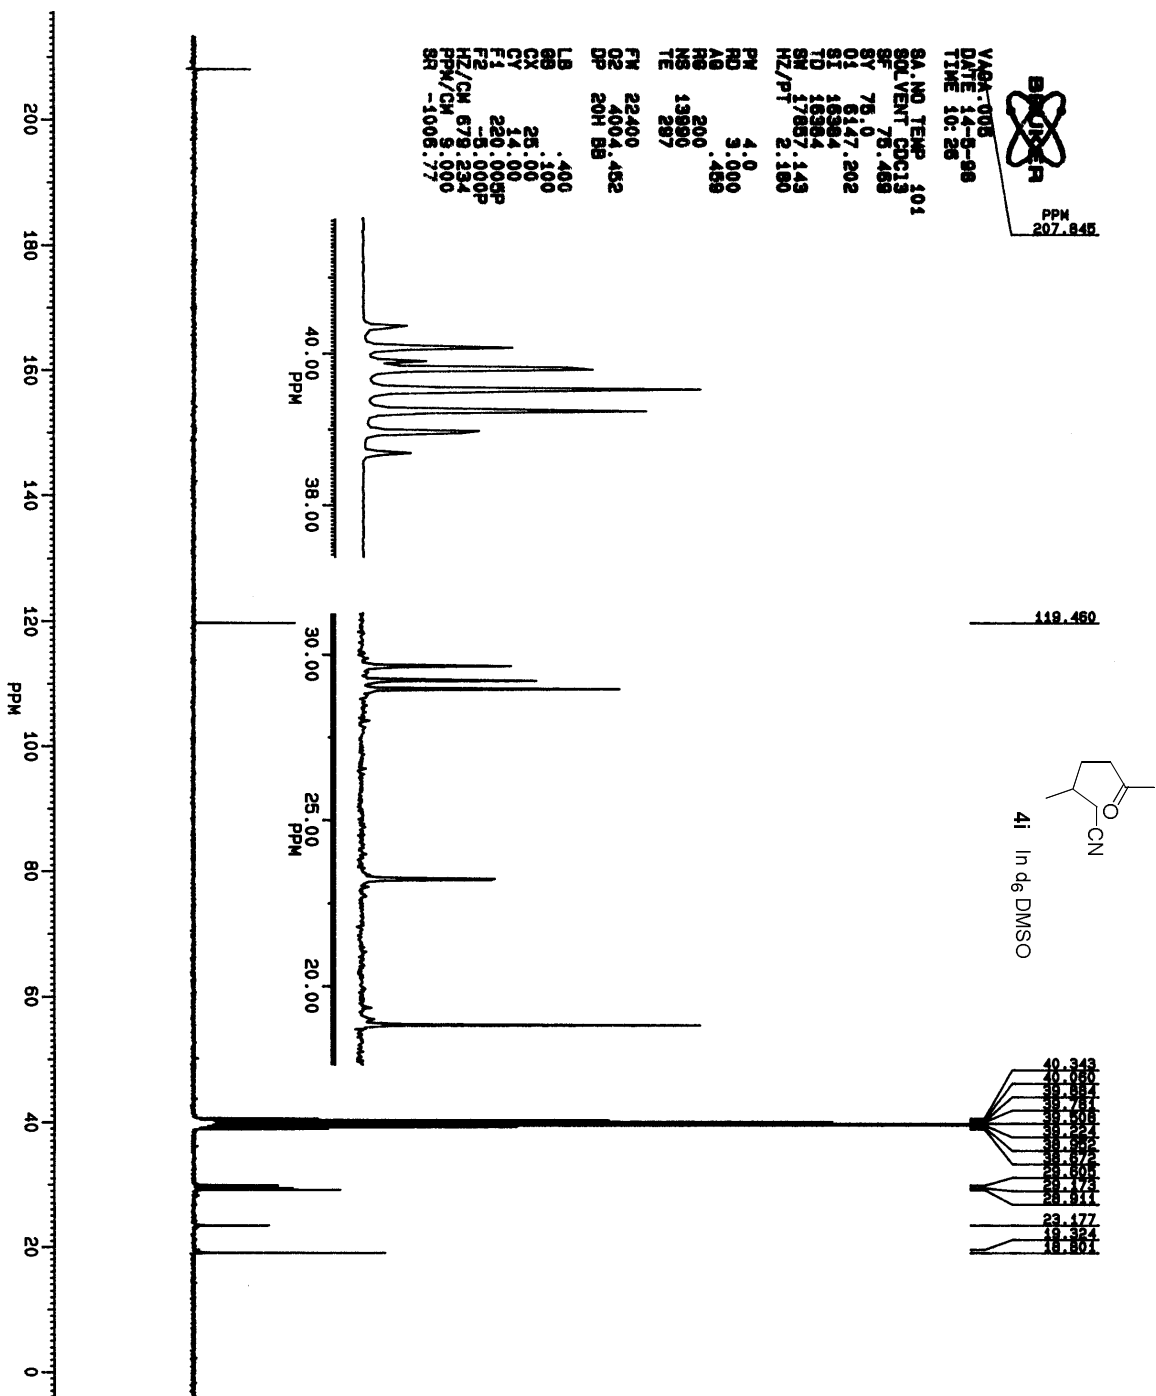

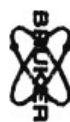

F. 002  
DATE 29-10-99  
TIME 6:37

SA. NO. TEMP. 101  
SOLVENT CDCl<sub>3</sub>  
SF 210.0  
SY 210.0  
O1 4800.000  
SI 16384  
TD 16384  
SW 4504.505  
HZ/PT .550  
PM 5.0  
RD 2.500  
AG 1.819  
RG 4  
NS 8  
TE 297  
FW 5700  
O2 5684.205  
DP 4L P0  
LB 0.0  
GB 0.100  
CX 25.00  
CY 8.00  
F1 10.001P  
F2 -198P  
HZ/CN 122.444  
PM/CN .408  
SR 3368.85

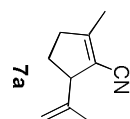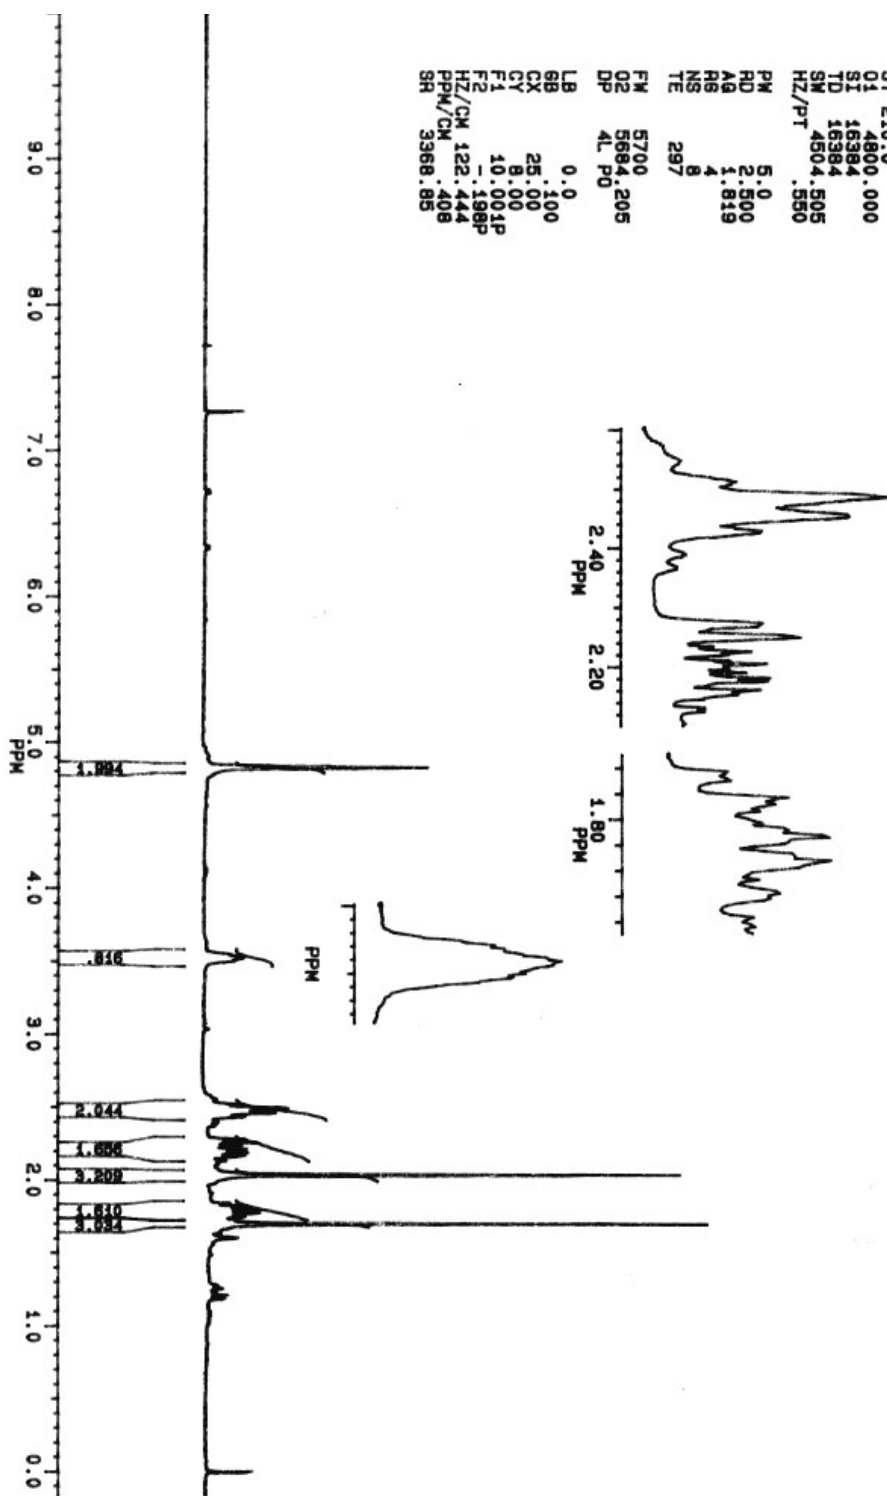

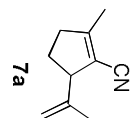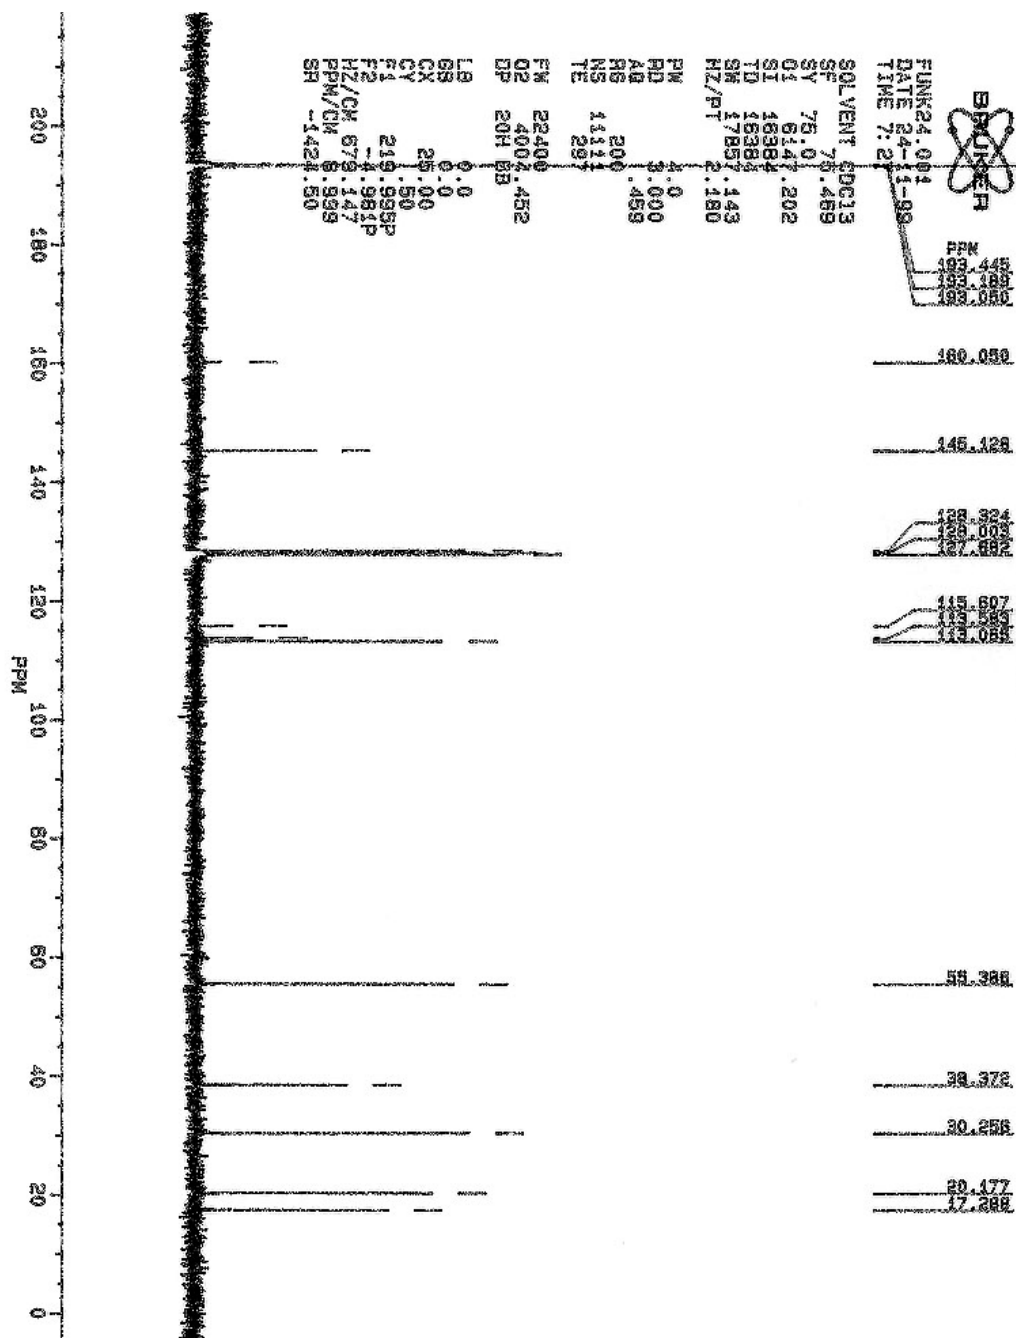

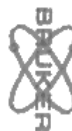

FUNK14.004  
DATE 28-10-99  
TIME 21:32

SOLVENT CDCl3  
SF 210.0  
SY 210.0  
O1 4800.000  
SI 16384  
TD 16384  
SM 4504.505  
HZ/PT .550

PM 5.0  
RD 2.500  
AG 1.819  
RG 4  
NS 16  
TE 297

FM 5700  
O2 5684.205  
DP 4L P0

LB 0.0  
GB 0.0  
CX 25.00  
CY 13.00  
F1 10.004P  
F2 -198P  
HZ/CM 122.444  
PPM/CM 3367.75  
SR 3367.75

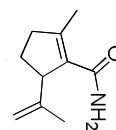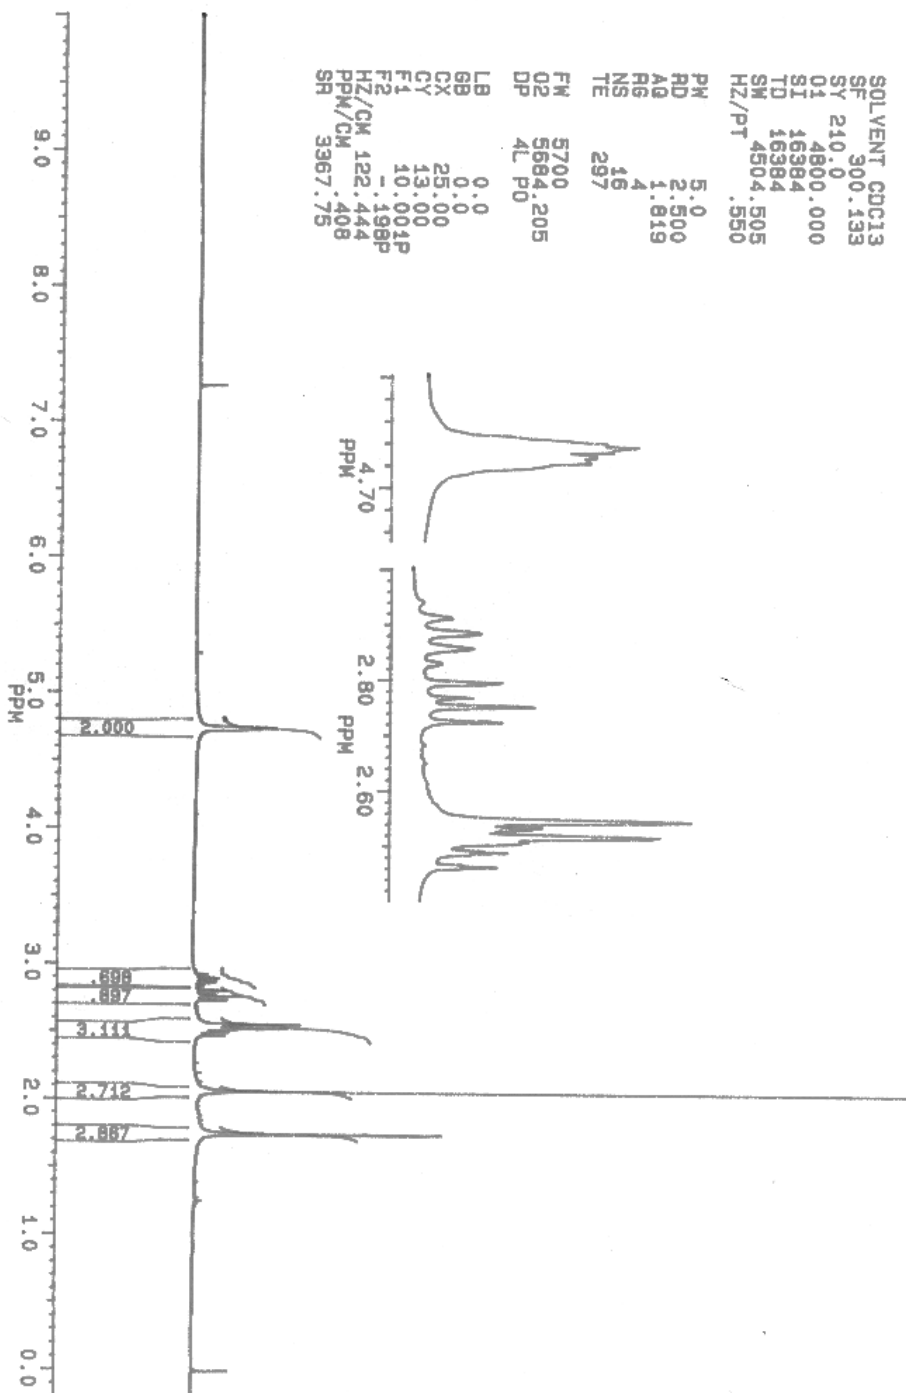



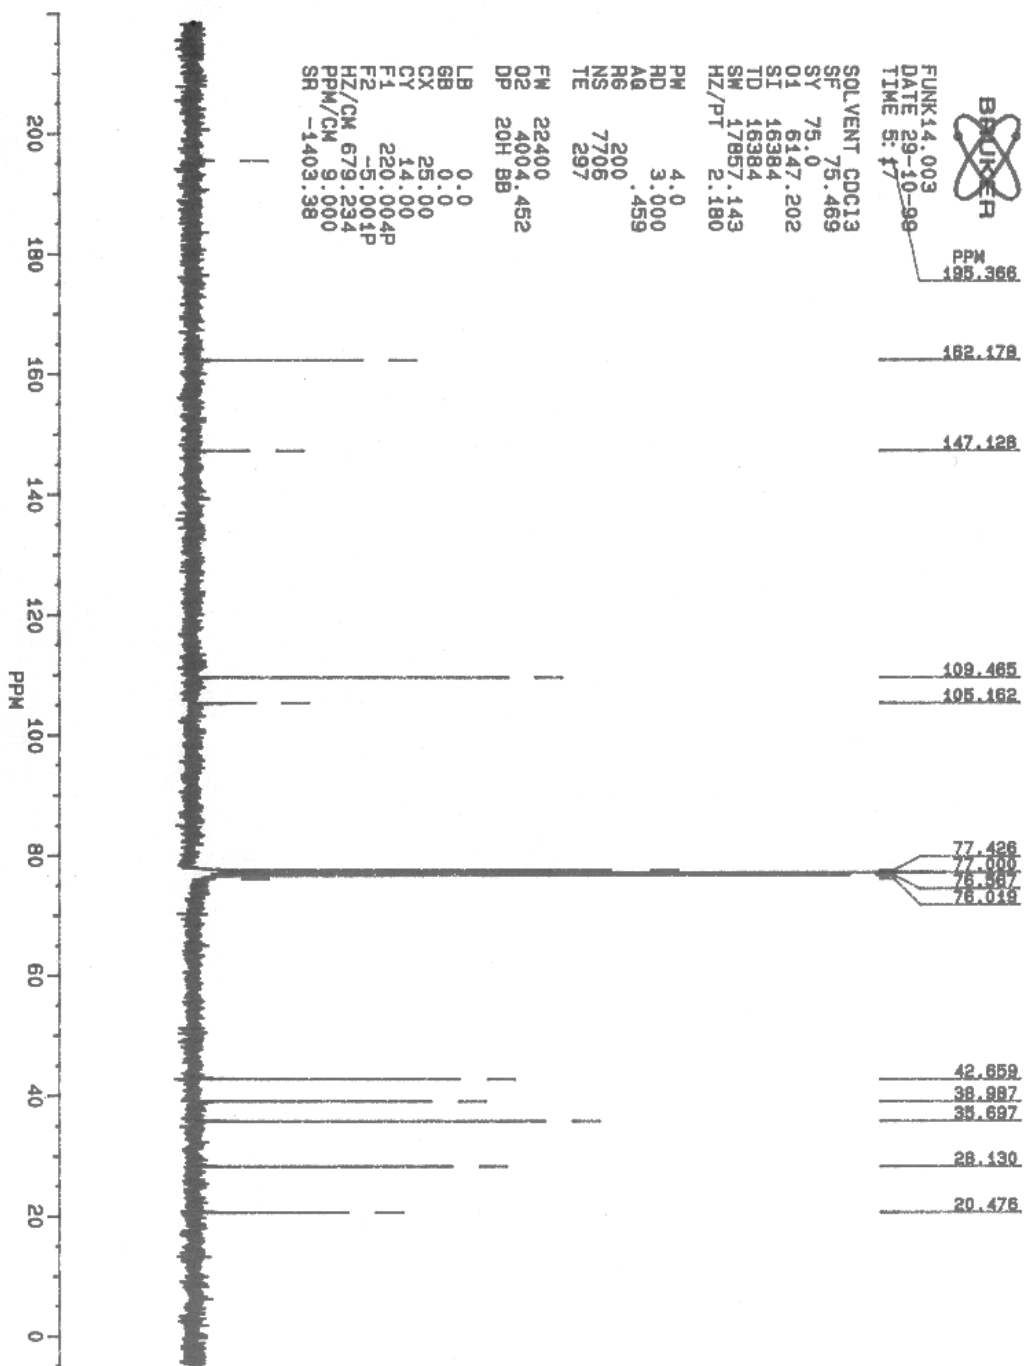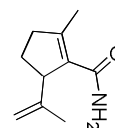

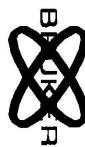

FFLF44.001  
DATE 21-5-1

|        |          |
|--------|----------|
| SF     | 300.133  |
| SY     | 210.0    |
| O1     | 4800.000 |
| SI     | 8192     |
| TD     | 8192     |
| SW     | 4504.505 |
| HZ/PT  | 1.100    |
| PW     | 5.0      |
| RD     | 2.500    |
| AG     | .909     |
| RG     | 4        |
| NS     | 8        |
| TE     | 297      |
| FW     | 5700     |
| O2     | 5684.205 |
| DP     | 4L P0    |
| LB     | 0.0      |
| GB     | 0.0      |
| CX     | 25.00    |
| CY     | 15.00    |
| F1     | 10.001P  |
| F2     | -197P    |
| HZ/CM  | 122.422  |
| PPM/CM | .408     |
| SR     | 3367.75  |

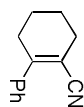

7b

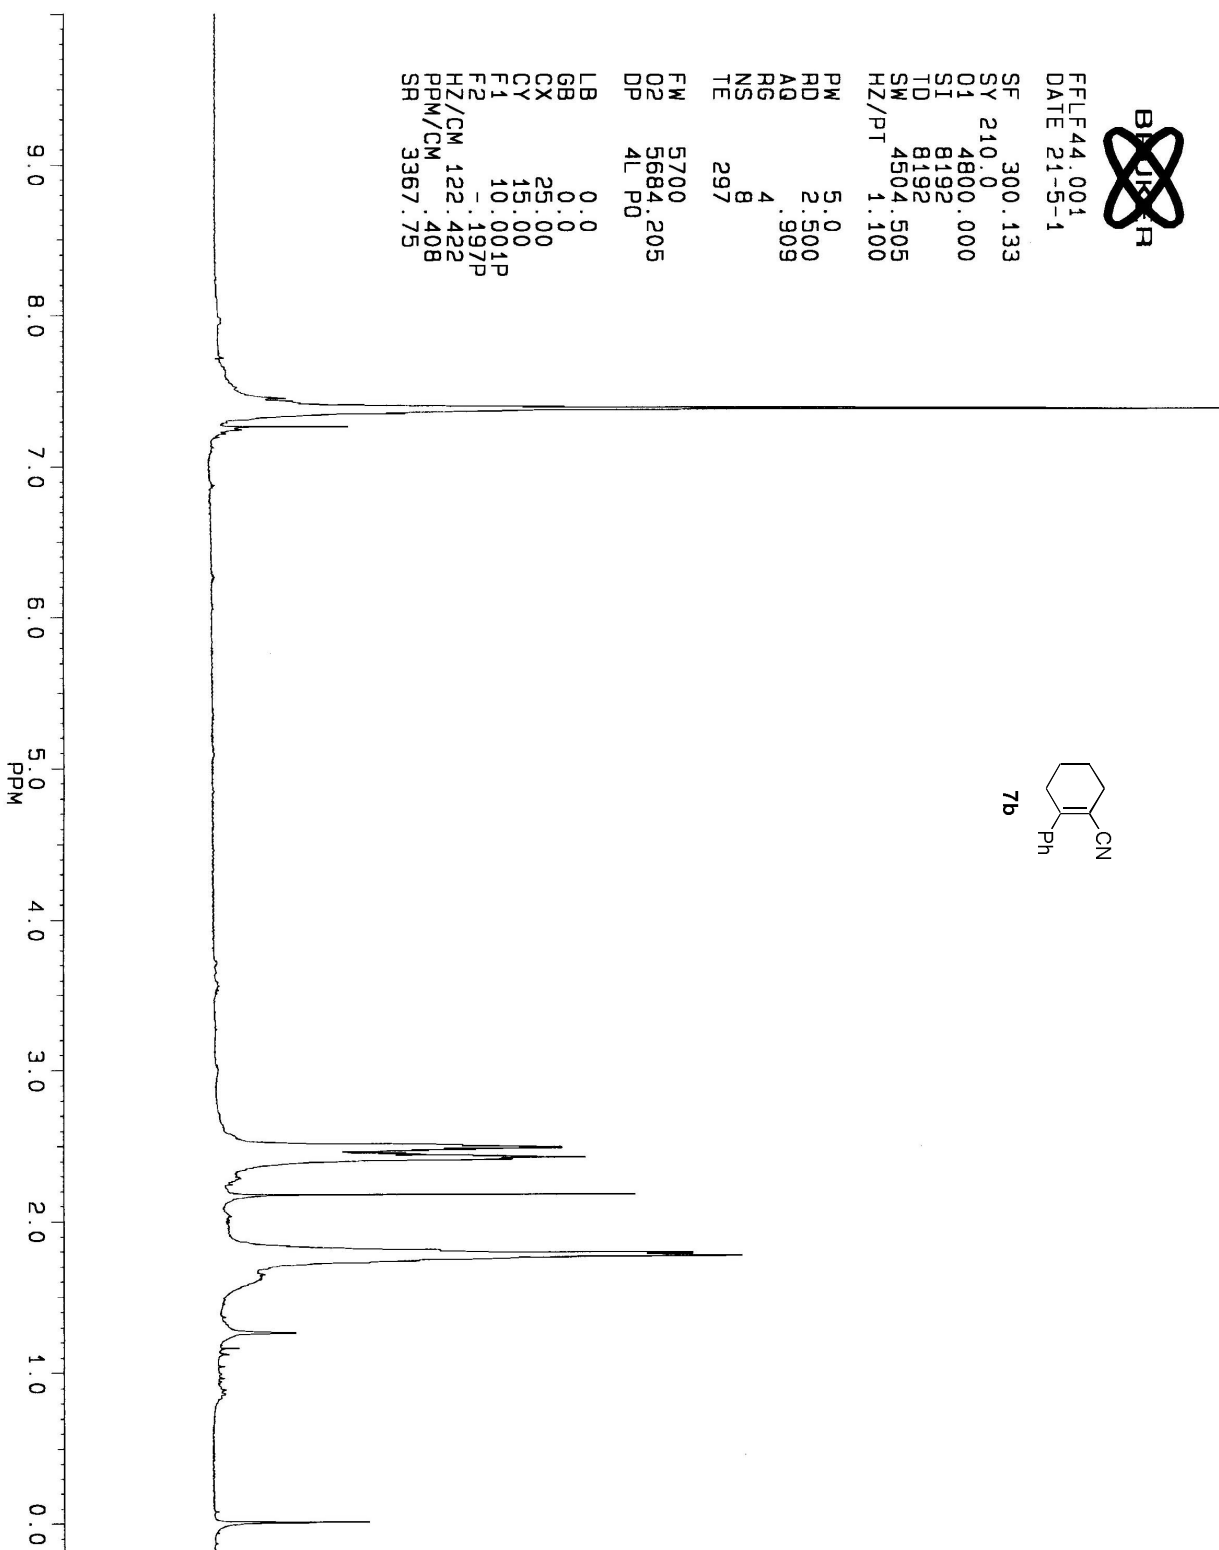

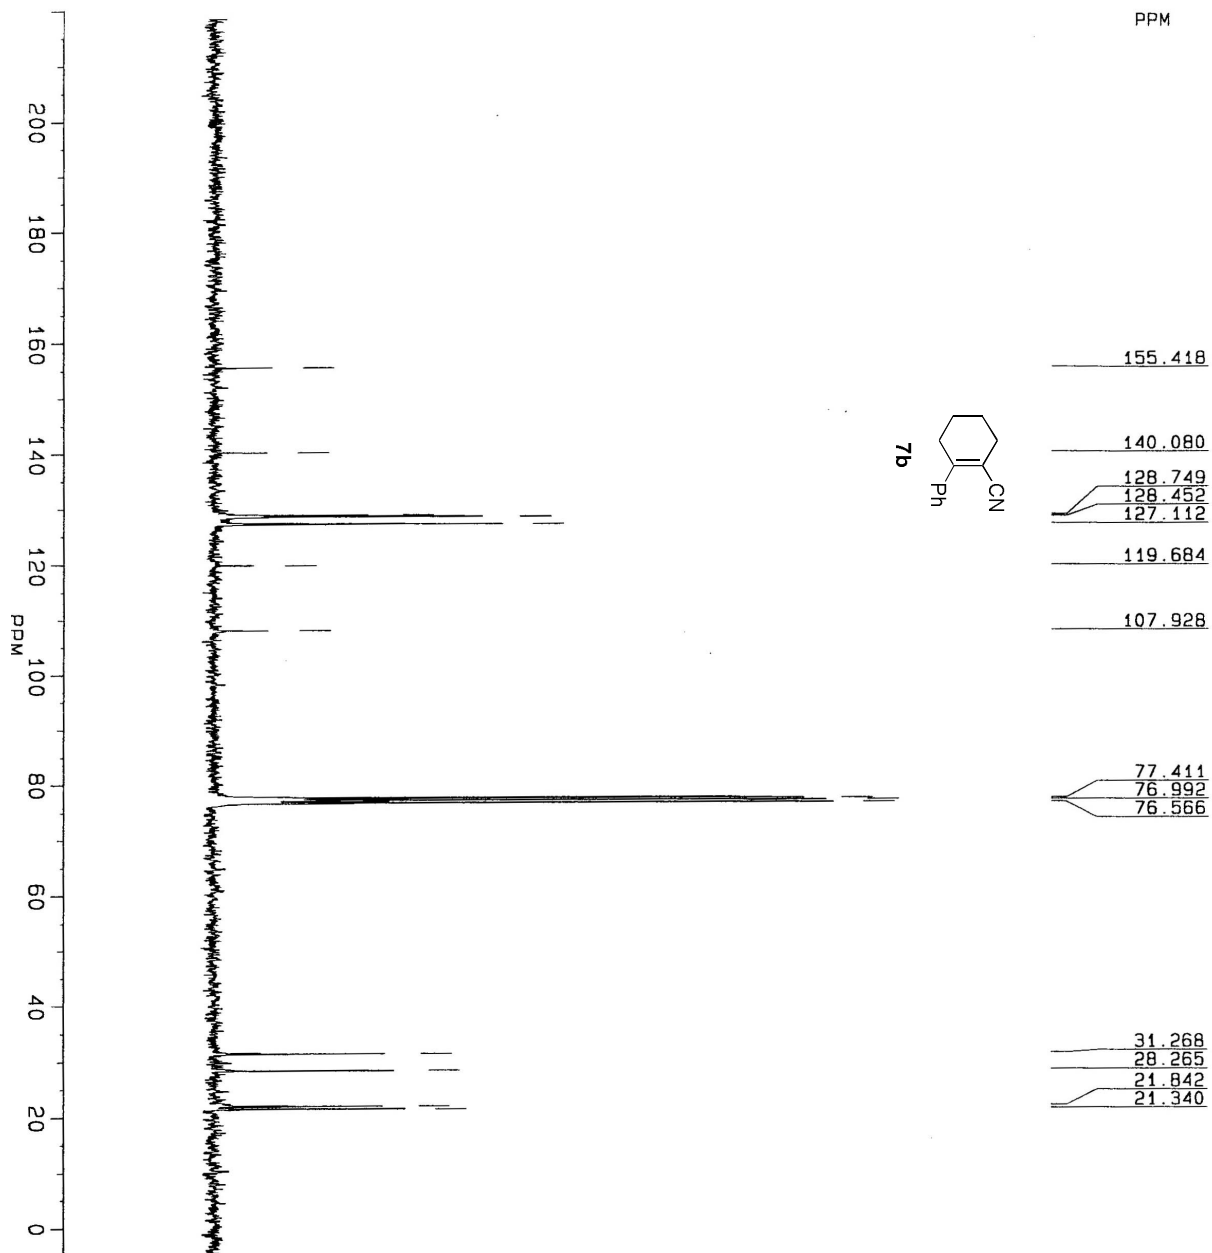

FFLF119.002  
DATE 29-5-1

SF 75.469  
SY 75.0  
O1 6147.202  
S1 16384  
TD 16384  
SW 17857.143  
HZ/PT 2.180

PW 4.0  
RD 3.000  
AQ .459  
RG 200  
NS 4208  
TE 297

FW 22400  
O2 4004.452  
DP 20H BB

LB 4.000  
GB 0 0  
CX 20.50  
CY 10.00  
F1 220.004P  
F2 -5.001P  
HZ/CM 828.334  
PM/CM 10.976  
SR -1403.38

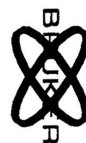

~~BRUKER~~

RAMA8121.001  
DATE 12-8-99  
TIME 18:17

SOLVENT CDCl3  
SC 300.133  
SY 210.0  
O1 4800.000  
SI 16384  
TD 16384  
SN 4504.505  
HZ/PT .560

PM 5.0  
RD 2.500  
AG 1.819  
RG 1  
NS 8  
TE 297

FW 5700  
O2 5684.205  
DP 4L P0

LB 0.0  
GB 0.0  
CX 25.00  
CY 8.00  
F1 10.001P  
F2 197P  
HZ/CM 122.422  
PPM/CM 3368.30  
SR

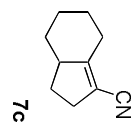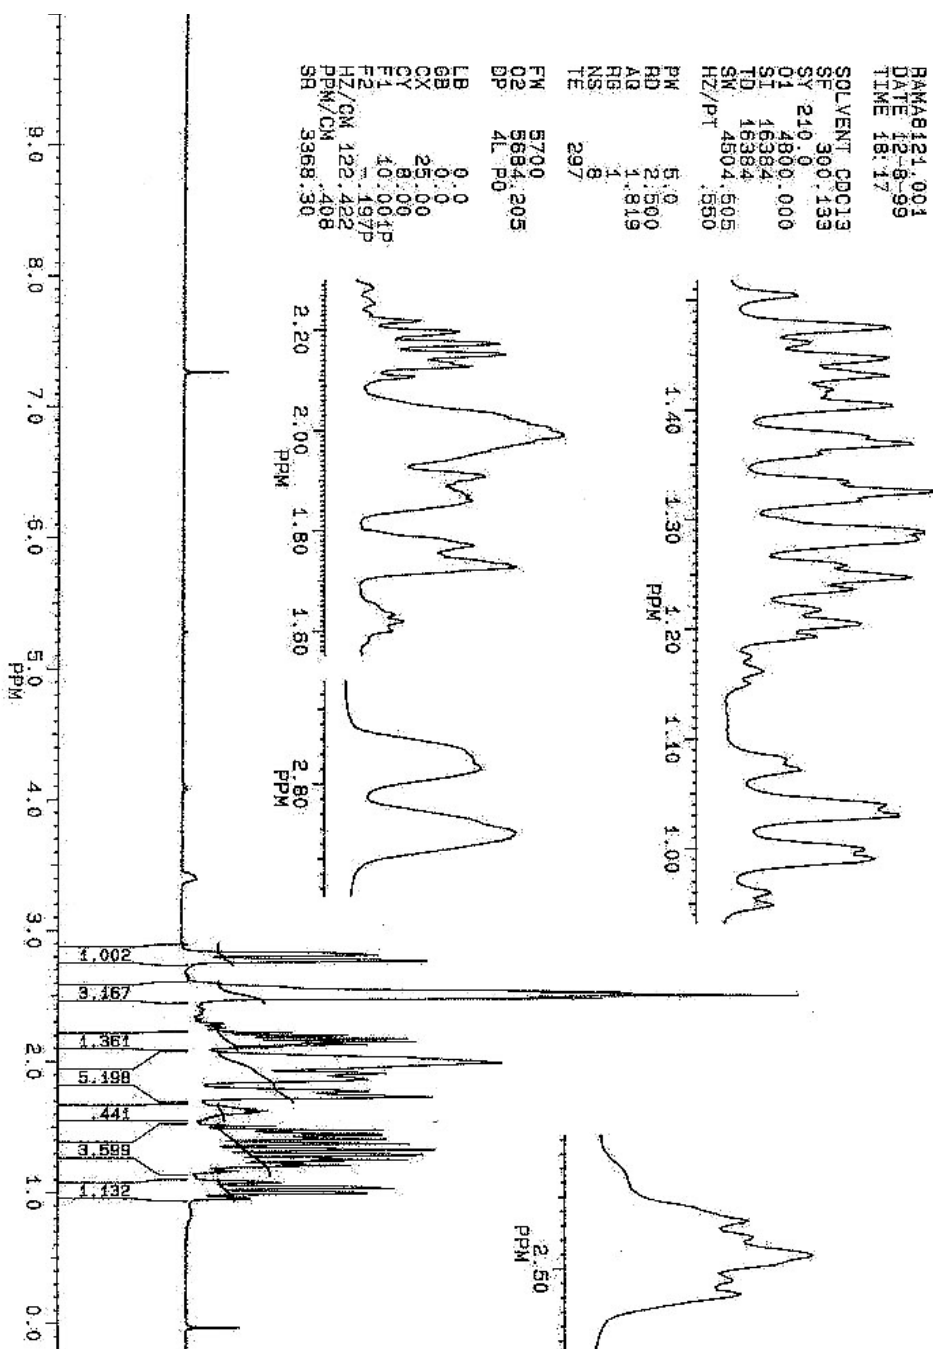

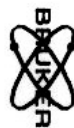

PPM

RAMA8121.101  
DATE 12-8-99  
TIME 22:34

SOLVENT CDCl<sub>3</sub>  
SF 75.0  
O1 6147.202  
SI 16384  
TD 16384  
SM 17857.143  
HZ/PT 2.180

PM 4.0  
RD 3.000  
RG 200  
NS 4107  
TE 297

FM 22400  
O2 4004.452  
DP 20H BB

LB 0.0  
GB 0.0  
CX 25.00  
CY .50  
F1 220.004P  
F2 -.495P  
HZ/CM 665.632  
PPM/CM 8.820  
SR -1396.84

166.018

116.773

104.095

77.410  
76.999  
76.567

46.612

34.857  
32.633  
29.574  
28.331  
26.195  
25.040

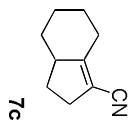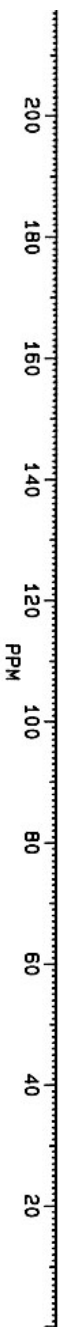

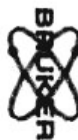

RAMA1112.001  
DATE 12-11-99  
TIME 13:17

SOLVENT CDCl<sub>3</sub>  
SF 300.133  
SY 210.0  
O1 4800.000  
SI 16384  
TD 16384  
SM 4504.505  
HZ/PT .550

PM 5.0  
RD 2.500  
AG 1.819  
RS 4  
NS 8  
TE 297

FM 5700  
O2 5684.205  
DP 4L P0

LB 0.0  
GB 0.0  
CX 25.00  
CY 9.00  
F1 10.004P  
F2 -1.198P  
HZ/CM 122.444  
PPM/CM 408  
SR 3367.20

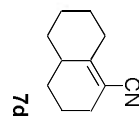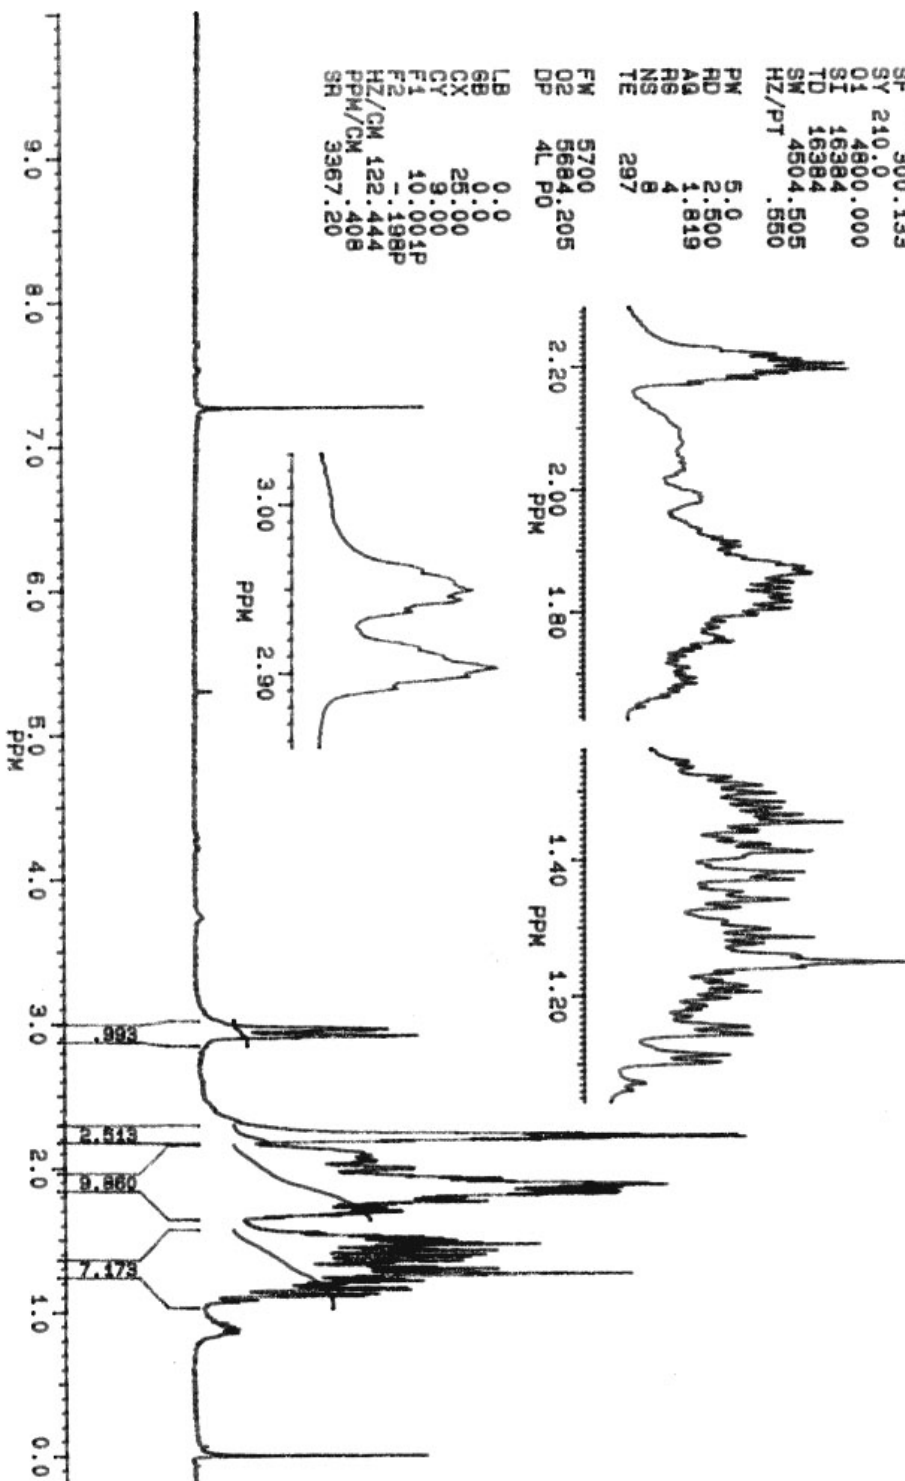

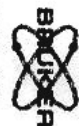

PPM

RAMAZI.101  
DATE 12-11-99  
TIME 5:57

SA. NO TEMP 101  
SOLVENT CDCl3

SF 75.0  
O1 6147.202  
SI 16384  
TD 16384  
SM 17857.143  
HZ/PT 2.180

PM 4.0  
RD 3.000  
AG 459  
HS 200  
NS 12274  
TE 297

FM 22400  
O2 4004.452  
DP 20H BB

LB 0.0  
GB 0.100  
CX 25.00  
CY .50  
F1 220.004P  
F2 -495P  
HZ/CM 665.632  
PPM/CM 8.820  
SR -1403.38

159.651

119.187

104.238

77.406  
76.848  
76.867

86.142  
85.113  
84.084  
82.954  
81.824  
80.694  
79.564  
78.434  
77.304  
76.174  
75.044  
73.914  
72.784  
71.654  
70.524  
69.394  
68.264  
67.134  
66.004  
64.874  
63.744  
62.614  
61.484  
60.354  
59.224  
58.094  
56.964  
55.834  
54.704  
53.574  
52.444  
51.314  
50.184  
49.054  
47.924  
46.794  
45.664  
44.534  
43.404  
42.274  
41.144  
40.014  
38.884  
37.754  
36.624  
35.494  
34.364  
33.234  
32.104  
30.974  
29.844  
28.714  
27.584  
26.454  
25.324  
24.194  
23.064  
21.934  
20.804  
19.674  
18.544  
17.414  
16.284  
15.154  
14.024  
12.894  
11.764  
10.634  
9.504  
8.374  
7.244  
6.114  
4.984  
3.854  
2.724  
1.594  
0.464  
-0.674  
-1.804  
-2.934  
-4.064  
-5.194  
-6.324  
-7.454  
-8.584  
-9.714  
-10.844  
-11.974  
-13.104  
-14.234  
-15.364  
-16.494  
-17.624  
-18.754  
-19.884  
-21.014  
-22.144  
-23.274  
-24.404  
-25.534  
-26.664  
-27.794  
-28.924  
-30.054  
-31.184  
-32.314  
-33.444  
-34.574  
-35.704  
-36.834  
-37.964  
-39.094  
-40.224  
-41.354  
-42.484  
-43.614  
-44.744  
-45.874  
-47.004  
-48.134  
-49.264  
-50.394  
-51.524  
-52.654  
-53.784  
-54.914  
-56.044  
-57.174  
-58.304  
-59.434  
-60.564  
-61.694  
-62.824  
-63.954  
-65.084  
-66.214  
-67.344  
-68.474  
-69.604  
-70.734  
-71.864  
-72.994  
-74.124  
-75.254  
-76.384  
-77.514  
-78.644  
-79.774  
-80.904  
-82.034  
-83.164  
-84.294  
-85.424  
-86.554  
-87.684  
-88.814  
-89.944  
-91.074  
-92.204  
-93.334  
-94.464  
-95.594  
-96.724  
-97.854  
-98.984  
-100.114  
-101.244  
-102.374  
-103.504  
-104.634  
-105.764  
-106.894  
-108.024  
-109.154  
-110.284  
-111.414  
-112.544  
-113.674  
-114.804  
-115.934  
-117.064  
-118.194  
-119.324  
-120.454  
-121.584  
-122.714  
-123.844  
-124.974  
-126.104  
-127.234  
-128.364  
-129.494  
-130.624  
-131.754  
-132.884  
-134.014  
-135.144  
-136.274  
-137.404  
-138.534  
-139.664  
-140.794  
-141.924  
-143.054  
-144.184  
-145.314  
-146.444  
-147.574  
-148.704  
-149.834  
-150.964  
-152.094  
-153.224  
-154.354  
-155.484  
-156.614  
-157.744  
-158.874  
-160.004  
-161.134  
-162.264  
-163.394  
-164.524  
-165.654  
-166.784  
-167.914  
-169.044  
-170.174  
-171.304  
-172.434  
-173.564  
-174.694  
-175.824  
-176.954  
-178.084  
-179.214  
-180.344  
-181.474  
-182.604  
-183.734  
-184.864  
-185.994  
-187.124  
-188.254  
-189.384  
-190.514  
-191.644  
-192.774  
-193.904  
-195.034  
-196.164  
-197.294  
-198.424  
-199.554  
-200.684  
-201.814  
-202.944  
-204.074  
-205.204  
-206.334  
-207.464  
-208.594  
-209.724  
-210.854  
-211.984  
-213.114  
-214.244  
-215.374  
-216.504  
-217.634  
-218.764  
-219.894  
-221.024  
-222.154  
-223.284  
-224.414  
-225.544  
-226.674  
-227.804  
-228.934  
-230.064  
-231.194  
-232.324  
-233.454  
-234.584  
-235.714  
-236.844  
-237.974  
-239.104  
-240.234  
-241.364  
-242.494  
-243.624  
-244.754  
-245.884  
-247.014  
-248.144  
-249.274  
-250.404  
-251.534  
-252.664  
-253.794  
-254.924  
-256.054  
-257.184  
-258.314  
-259.444  
-260.574  
-261.704  
-262.834  
-263.964  
-265.094  
-266.224  
-267.354  
-268.484  
-269.614  
-270.744  
-271.874  
-273.004  
-274.134  
-275.264  
-276.394  
-277.524  
-278.654  
-279.784  
-280.914  
-282.044  
-283.174  
-284.304  
-285.434  
-286.564  
-287.694  
-288.824  
-289.954  
-291.084  
-292.214  
-293.344  
-294.474  
-295.604  
-296.734  
-297.864  
-298.994  
-300.124  
-301.254  
-302.384  
-303.514  
-304.644  
-305.774  
-306.904  
-308.034  
-309.164  
-310.294  
-311.424  
-312.554  
-313.684  
-314.814  
-315.944  
-317.074  
-318.204  
-319.334  
-320.464  
-321.594  
-322.724  
-323.854  
-324.984  
-326.114  
-327.244  
-328.374  
-329.504  
-330.634  
-331.764  
-332.894  
-334.024  
-335.154  
-336.284  
-337.414  
-338.544  
-339.674  
-340.804  
-341.934  
-343.064  
-344.194  
-345.324  
-346.454  
-347.584  
-348.714  
-349.844  
-350.974  
-352.104  
-353.234  
-354.364  
-355.494  
-356.624  
-357.754  
-358.884  
-360.014  
-361.144  
-362.274  
-363.404  
-364.534  
-365.664  
-366.794  
-367.924  
-369.054  
-370.184  
-371.314  
-372.444  
-373.574  
-374.704  
-375.834  
-376.964  
-378.094  
-379.224  
-380.354  
-381.484  
-382.614  
-383.744  
-384.874  
-386.004  
-387.134  
-388.264  
-389.394  
-390.524  
-391.654  
-392.784  
-393.914  
-395.044  
-396.174  
-397.304  
-398.434  
-399.564  
-400.694  
-401.824  
-402.954  
-404.084  
-405.214  
-406.344  
-407.474  
-408.604  
-409.734  
-410.864  
-411.994  
-413.124  
-414.254  
-415.384  
-416.514  
-417.644  
-418.774  
-419.904  
-421.034  
-422.164  
-423.294  
-424.424  
-425.554  
-426.684  
-427.814  
-428.944  
-430.074  
-431.204  
-432.334  
-433.464  
-434.594  
-435.724  
-436.854  
-437.984  
-439.114  
-440.244  
-441.374  
-442.504  
-443.634  
-444.764  
-445.894  
-447.024  
-448.154  
-449.284  
-450.414  
-451.544  
-452.674  
-453.804  
-454.934  
-456.064  
-457.194  
-458.324  
-459.454  
-460.584  
-461.714  
-462.844  
-463.974  
-465.104  
-466.234  
-467.364  
-468.494  
-469.624  
-470.754  
-471.884  
-473.014  
-474.144  
-475.274  
-476.404  
-477.534  
-478.664  
-479.794  
-480.924  
-482.054  
-483.184  
-484.314  
-485.444  
-486.574  
-487.704  
-488.834  
-489.964  
-491.094  
-492.224  
-493.354  
-494.484  
-495.614  
-496.744  
-497.874  
-499.004  
-500.134  
-501.264  
-502.394  
-503.524  
-504.654  
-505.784  
-506.914  
-508.044  
-509.174  
-510.304  
-511.434  
-512.564  
-513.694  
-514.824  
-515.954  
-517.084  
-518.214  
-519.344  
-520.474  
-521.604  
-522.734  
-523.864  
-524.994  
-526.124  
-527.254  
-528.384  
-529.514  
-530.644  
-531.774  
-532.904  
-534.034  
-535.164  
-536.294  
-537.424  
-538.554  
-539.684  
-540.814  
-541.944  
-543.074  
-544.204  
-545.334  
-546.464  
-547.594  
-548.724  
-549.854  
-550.984  
-552.114  
-553.244  
-554.374  
-555.504  
-556.634  
-557.764  
-558.894  
-560.024  
-561.154  
-562.284  
-563.414  
-564.544  
-565.674  
-566.804  
-567.934  
-569.064  
-570.194  
-571.324  
-572.454  
-573.584  
-574.714  
-575.844  
-576.974  
-578.104  
-579.234  
-580.364  
-581.494  
-582.624  
-583.754  
-584.884  
-586.014  
-587.144  
-588.274  
-589.404  
-590.534  
-591.664  
-592.794  
-593.924  
-595.054  
-596.184  
-597.314  
-598.444  
-599.574  
-600.704  
-601.834  
-602.964  
-604.094  
-605.224  
-606.354  
-607.484  
-608.614  
-609.744  
-610.874  
-612.004  
-613.134  
-614.264  
-615.394  
-616.524  
-617.654  
-618.784  
-619.914  
-621.044  
-622.174  
-623.304  
-624.434  
-625.564  
-626.694  
-627.824  
-628.954  
-630.084  
-631.214  
-632.344  
-633.474  
-634.604  
-635.734  
-636.864  
-637.994  
-639.124  
-640.254  
-641.384  
-642.514  
-643.644  
-644.774  
-645.904  
-647.034  
-648.164  
-649.294  
-650.424  
-651.554  
-652.684  
-653.814  
-654.944  
-656.074  
-657.204  
-658.334  
-659.464  
-660.594  
-661.724  
-662.854  
-663.984  
-665.114  
-666.244  
-667.374  
-668.504  
-669.634  
-670.764  
-671.894  
-673.024  
-674.154  
-675.284  
-676.414  
-677.544  
-678.674  
-679.804  
-680.934  
-682.064  
-683.194  
-684.324  
-685.454  
-686.584  
-687.714  
-688.844  
-689.974  
-691.104  
-692.234  
-693.364  
-694.494  
-695.624  
-696.754  
-697.884  
-699.014  
-700.144  
-701.274  
-702.404  
-703.534  
-704.664  
-705.794  
-706.924  
-708.054  
-709.184  
-710.314  
-711.444  
-712.574  
-713.704  
-714.834  
-715.964  
-717.094  
-718.224  
-719.354  
-720.484  
-721.614  
-722.744  
-723.874  
-725.004  
-726.134  
-727.264  
-728.394  
-729.524  
-730.654  
-731.784  
-732.914  
-734.044  
-735.174  
-736.304  
-737.434  
-738.564  
-739.694  
-740.824  
-741.954  
-743.084  
-744.214  
-745.344  
-746.474  
-747.604  
-748.734  
-749.864  
-750.994  
-752.124  
-753.254  
-754.384  
-755.514  
-756.644  
-757.774  
-758.904  
-760.034  
-761.164  
-762.294  
-763.424  
-764.554  
-765.684  
-766.814  
-767.944  
-769.074  
-770.204  
-771.334  
-772.464  
-773.594  
-774.724  
-775.854  
-776.984  
-778.114  
-779.244  
-780.374  
-781.504  
-782.634  
-783.764  
-784.894  
-786.024  
-787.154  
-788.284  
-789.414  
-790.544  
-791.674  
-792.804  
-793.934  
-795.064  
-796.194  
-797.324  
-798.454  
-799.584  
-800.714  
-801.844  
-802.974  
-804.104  
-805.234  
-806.364  
-807.494  
-808.624  
-809.754  
-810.884  
-812.014  
-813.144  
-814.274  
-815.404  
-816.534  
-817.664  
-818.794  
-819.924  
-821.054  
-822.184  
-823.314  
-824.444  
-825.574  
-826.704  
-827.834  
-828.964  
-830.094  
-831.224  
-832.354  
-833.484  
-834.614  
-835.744  
-836.874  
-838.004  
-839.134  
-840.264  
-841.394  
-842.524  
-843.654  
-844.784  
-845.914  
-847.044  
-848.174  
-849.304  
-850.434  
-851.564  
-852.694  
-853.824  
-854.954  
-856.084  
-857.214  
-858.344  
-859.474  
-860.604  
-861.734  
-862.864  
-863.994  
-865.124  
-866.254  
-867.384  
-868.514  
-869.644  
-870.774  
-871.904  
-873.034  
-874.164  
-875.294  
-876.424  
-877.554  
-878.684  
-879.814  
-880.944  
-882.074  
-883.204  
-884.334  
-885.464  
-886.594  
-887.724  
-888.854  
-890.084  
-891.214  
-892.344  
-893.474  
-894.604  
-895.734  
-896.864  
-897.994  
-899.124  
-900.254  
-901.384  
-902.514  
-903.644  
-904.774  
-905.904  
-907.034  
-908.164  
-909.294  
-910.424  
-911.554  
-912.684  
-913.814  
-914.944  
-916.074  
-917.204  
-918.334  
-919.464  
-920.594  
-921.724  
-922.854  
-923.984  
-925.114  
-926.244  
-927.374  
-928.504  
-929.634  
-930.764  
-931.894  
-933.024  
-934.154  
-935.284  
-936.414  
-937.544  
-938.674  
-939.804  
-940.934  
-942.064  
-943.194  
-944.324  
-945.454  
-946.584  
-947.714  
-948.844  
-949.974  
-951.104  
-952.234  
-953.364  
-954.494  
-955.624  
-956.754  
-957.884  
-959.014  
-960.144  
-961.274  
-962.404  
-963.534  
-964.664  
-965.794  
-966.924  
-968.054  
-969.184  
-970.314  
-971.444  
-972.574  
-973.704  
-974.834  
-975.964  
-977.094  
-978.224  
-979.354  
-980.484  
-981.614  
-982.744  
-983.874  
-985.004  
-986.134  
-987.264  
-988.394  
-989.524  
-990.654  
-991.784  
-992.914  
-994.044  
-995.174  
-996.304  
-997.434  
-998.564  
-999.694  
-1000.824  
-1001.954  
-1003.084  
-1004.214  
-1005.344  
-1006.474  
-1007.604  
-1008.734  
-1009.864  
-1010.994  
-1012.124  
-1013.254  
-1014.384  
-1015.514  
-1016.644  
-1017.774  
-1018.904  
-1020.034  
-1021.164  
-1022.294  
-1023.424  
-1024.554  
-1025.684  
-1026.814  
-1027.944  
-1029.074  
-1030.204  
-1031.334  
-1032.464  
-1033.594  
-1034.724  
-1035.854  
-1036.984  
-1038.114  
-1039.244  
-1040.374  
-1041.504  
-1042.634  
-1043.764  
-1044.894  
-1046.024  
-1047.154  
-1048.284  
-1049.414  
-1050.544  
-1051.674  
-1052.804  
-1053.934  
-1055.064  
-1056.194  
-1057.324  
-1058.454  
-1059.584  
-1060.714  
-1061.844  
-1062.974  
-1064.104  
-1065.234  
-1066.364  
-1067.494  
-1068.624  
-1069.754  
-1070.884  
-1072.014  
-1073.144  
-1074.274  
-1075.404  
-1076.534  
-1077.664  
-1078.794  
-1079.924  
-1081.054  
-1082.184  
-1083.314  
-1084.444  
-1085.574  
-1086.704  
-1087.834  
-1088.964  
-1090.094  
-1091.224  
-1092.354  
-1093.484  
-1094.614  
-1095.744  
-1096.874  
-1098.004  
-1099.134  
-1100.264  
-1101.394  
-1102.524  
-1103.654  
-1104.784  
-1105.914  
-1107.044  
-1108.174  
-1109.304  
-1110.434  
-1111.564  
-1112.694  
-1113.824  
-1114.954  
-1116.084  
-1117.214  
-1118.344  
-1119.474  
-1120.604  
-1121.734  
-1122.864  
-1123.994  
-1125.124  
-1126.254  
-1127.384  
-1128.514  
-1129.644  
-1130.774  
-1131.904  
-1133.034  
-1134.164  
-1135.294  
-1136.424  
-1137.554  
-1138.684  
-1139.814  
-1140.944  
-1142.074  
-1143.204  
-1144.334  
-1145.464  
-1146.594  
-1147.724  
-1148.854  
-1149.984  
-1151.114  
-1152.244  
-1153.374  
-1154.504  
-1155.634  
-1156.764  
-1157.894  
-1159.024  
-1160.154  
-1161.284  
-1162.414  
-1163.544  
-1164.674  
-1165.804  
-1166.934  
-1168.064  
-1169.194  
-1170.324  
-1171.454  
-1172.584  
-1173.714  
-1174.844  
-1175.974  
-1177.104  
-1178.234  
-1179.364  
-1180.494  
-1181.624  
-1182.754  
-1183.884  
-1185.014  
-1186.144  
-1187.274  
-1188.404  
-1189.534  
-1190.664  
-1191.794  
-1192.924  
-1194.054  
-1195.184  
-1196.314  
-1197.444  
-1198.574  
-1199.704  
-1200.834  
-1201.964  
-1203.094  
-1204.224  
-1205.354  
-1206.484  
-1207.614  
-1208.744  
-1209.874  
-1211.004  
-1212.134  
-1213.264  
-1214.394  
-1215.524  
-1216.654  
-1217.784  
-1218.914  
-1220.044  
-1221.174  
-1222.304  
-1223.434  
-1224.564  
-1225.694  
-1226.824  
-1227.954  
-1229.084  
-1230.214  
-1231.344  
-1232.474  
-1233.604  
-1234.734  
-1

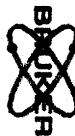

RAMA1020.001  
DATE 20-10-99  
TIME 18:25

SOLVENT CDCl<sub>3</sub>  
SF 300.133  
SY 210.0  
O1 4800.000  
SI 16384  
TD 16384  
SM 4804.505  
HZ/PT .550

PM 5.0  
RD 2.500  
AG 1.819  
RG 4  
NS 8  
TE 297

FM 5700  
O2 5684.205  
DP 4L P0

LB 0.0  
GB 0.0  
CX 25.00  
CY 8.00  
F1 10.001P  
F2 -197P  
HZ/CM 122.422  
PPM/CM .408  
SR 3368.30

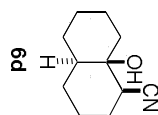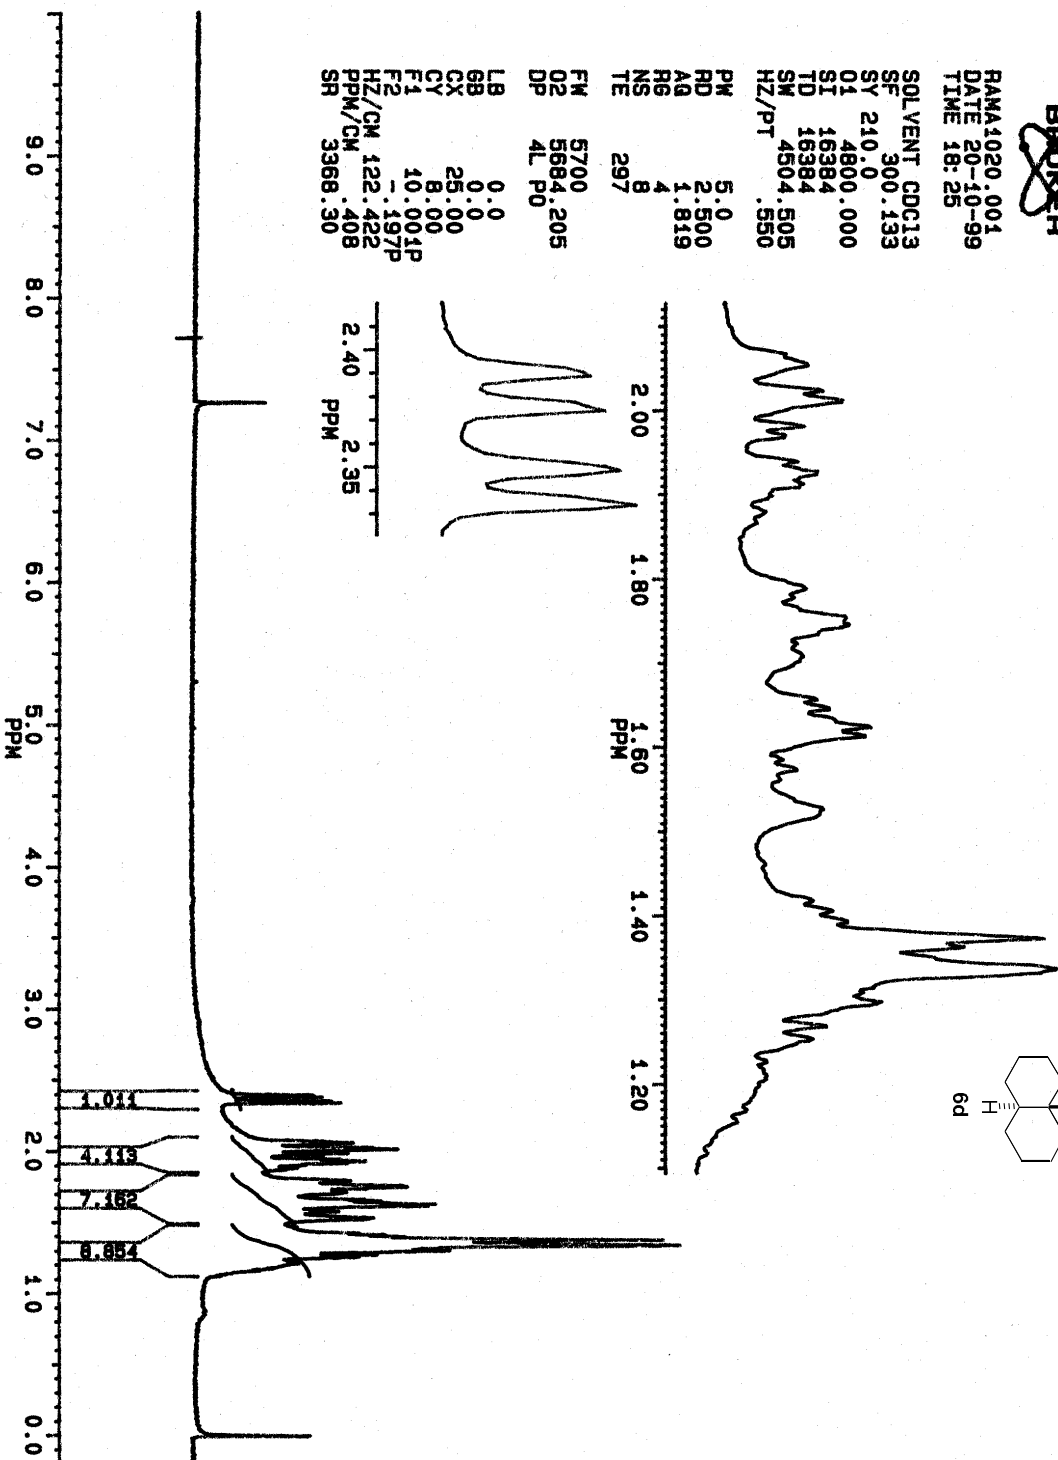



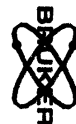

PPM

F.001  
DATE 21-10-99  
TIME 8:05

SOLVENT CDCl<sub>3</sub>  
SF 75.0  
SY 75.0  
O1 6147.202  
SI 16384  
TD 16384  
SM 17867.143  
HZ/PT 2.180

PM 4.0  
RD 3.000  
AG 200  
NS 13278  
TE 297

FM 22400  
O2 4004.452  
DP 20H BB

LB 0.0  
GB 0.0  
GX 25.00  
CY 50  
F1 220.004P  
F2 -486P  
HZ/CN 665.632  
PPM/CN 8.820  
SR -1401.20

120.501

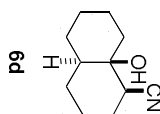

77.407  
76.996  
76.568  
69.888

43.699  
41.337  
37.575

28.302  
27.345  
25.878  
25.745  
24.780  
21.285

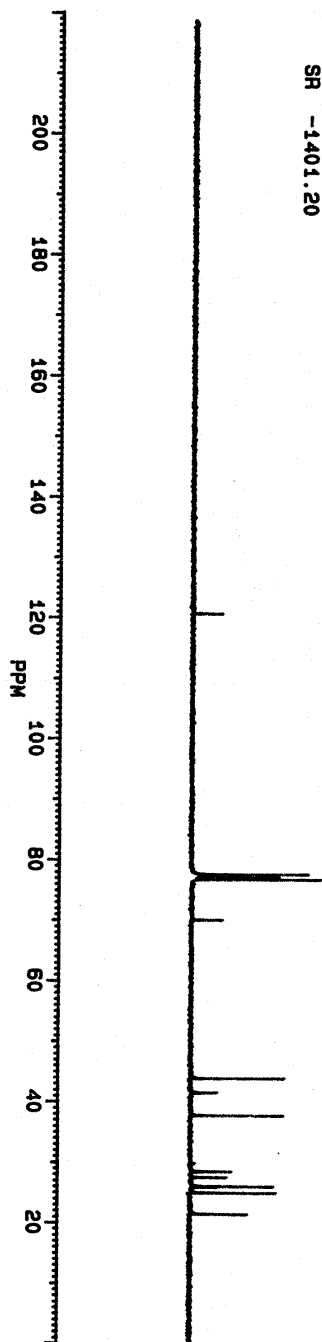

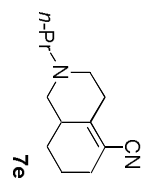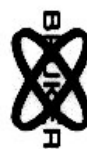

FFLF10.001  
DATE 22-11-0

SF 300.133  
SY 210.0  
O1 4800.000  
SI 8192  
TD 8192  
SM 4504.505  
HZ/PT 1.100

PM 5.0  
RD 2.500  
AQ .909  
RG 8  
NS 8  
TE 297

FM 5700  
O2 5684.205  
DP 4L P0

LB 0.0  
GB 0.0  
CX 20.50  
CY 8.00  
F1 10.001P  
F2 -.200P  
HZ/GM 149.349  
PPM/GM .498  
SR 3367.75

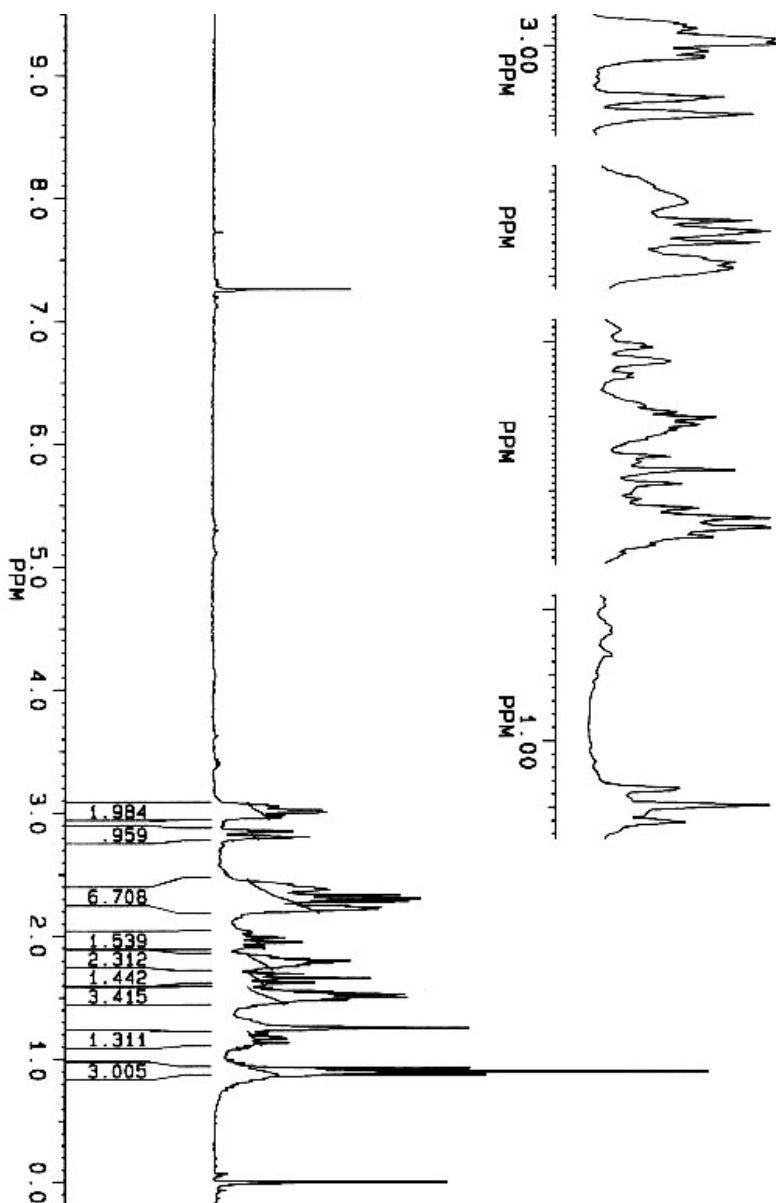

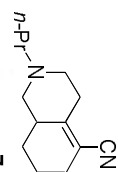

|         |
|---------|
| 156.313 |
| 118.630 |
| 104.999 |
| 77.431  |
| 77.008  |
| 76.583  |
| 60.363  |
| 59.853  |
| 53.725  |
| 37.322  |
| 32.858  |
| 27.436  |
| 26.441  |
| 20.472  |
| 20.108  |
| 11.815  |

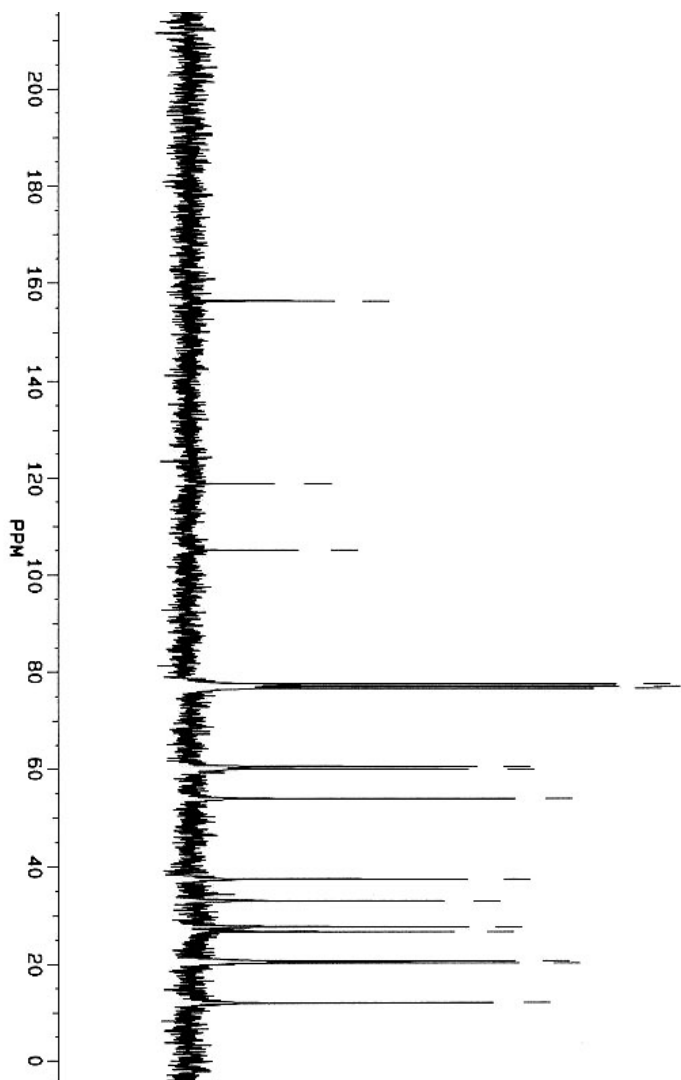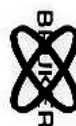

F 001  
 DATE 1-3-96  
 SF 75.469  
 SY 75.0  
 O1 6147.202  
 S1 16384  
 TD 16384  
 SW 17857.143  
 HZ/PT 2.180  
 PM 4.0  
 RD 3.000  
 AQ .459  
 RG 200  
 NS 1311  
 TE 297  
 FW 22400  
 O2 4004.452  
 DP 20H BB  
 LB 2.000  
 GB 0.0  
 CX 20.50  
 CY 8.00  
 F1 220.004P  
 F2 -5.001P  
 HZ/CW 828.334  
 PPM/CW 10.976  
 SR -1399.02

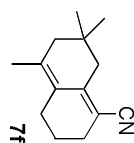

~~SECRET~~

FELF50.001  
DATE 5-3-1

SF 300.133  
SY 210.0  
Q1 4800.000  
S1 8192  
T0 8192  
SW 4504.505  
HZ/P1 1.100

PM 5.0  
RD 2.500  
AQ 909  
RG 4  
NS 32  
TE 297

FM 5700  
O2 5684.205  
OP 4L PG

LB 0.0  
GB 0.0  
CX 20.50  
CY 8.00  
F1 10.001P  
F2 200P  
HZ/CM 149.349  
RPM/CM 498  
SR 3367.75

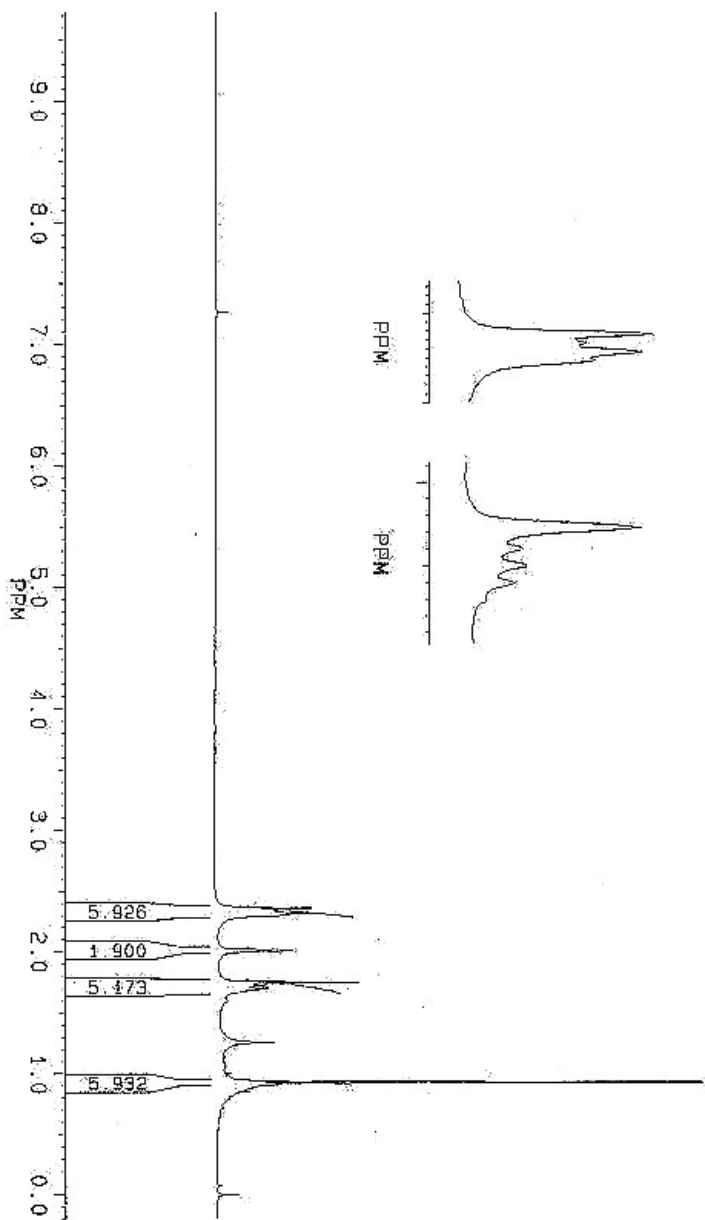

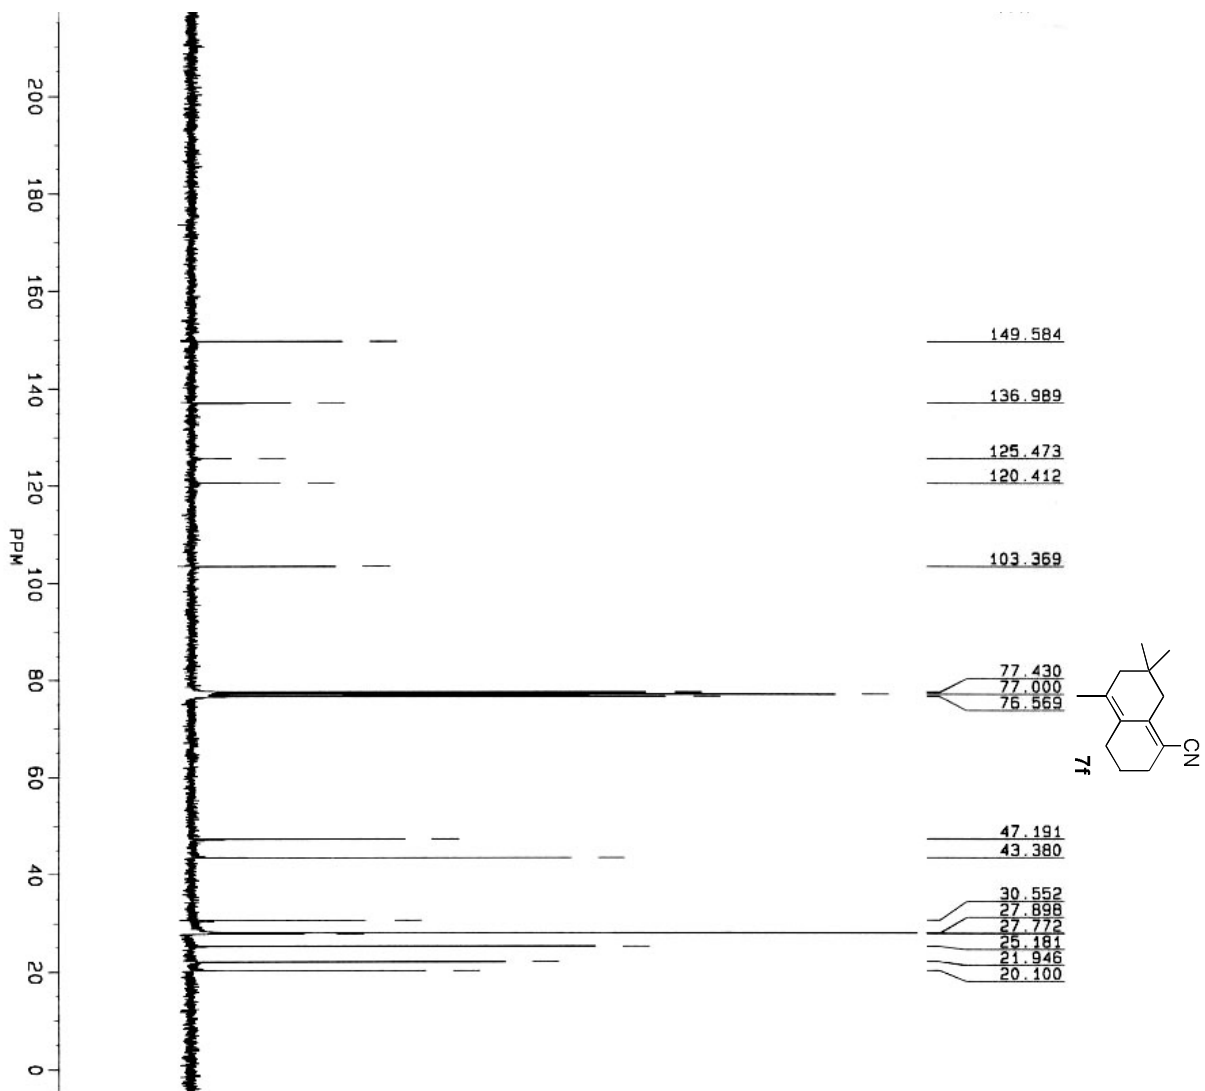

FILE 99.001  
 DATE 29-3-1  
 SF 75.469  
 SY 75.0  
 O1 6147.202  
 SI 16384  
 TD 16384  
 SW 17857.143  
 HZ/PT 2.180  
 PM 4.0  
 RD 3.000  
 AG .459  
 RG 200  
 NS 13191  
 TE 297  
 FM 22400  
 O2 4004.452  
 DP 20H BB  
 LB 0.0  
 GB 0.0  
 CX 20.50  
 CY 12.00  
 F1 220.004P  
 F2 -5.001P  
 HZ/CW 828.334  
 PPM/CW 10.976  
 SR -1403.38

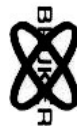

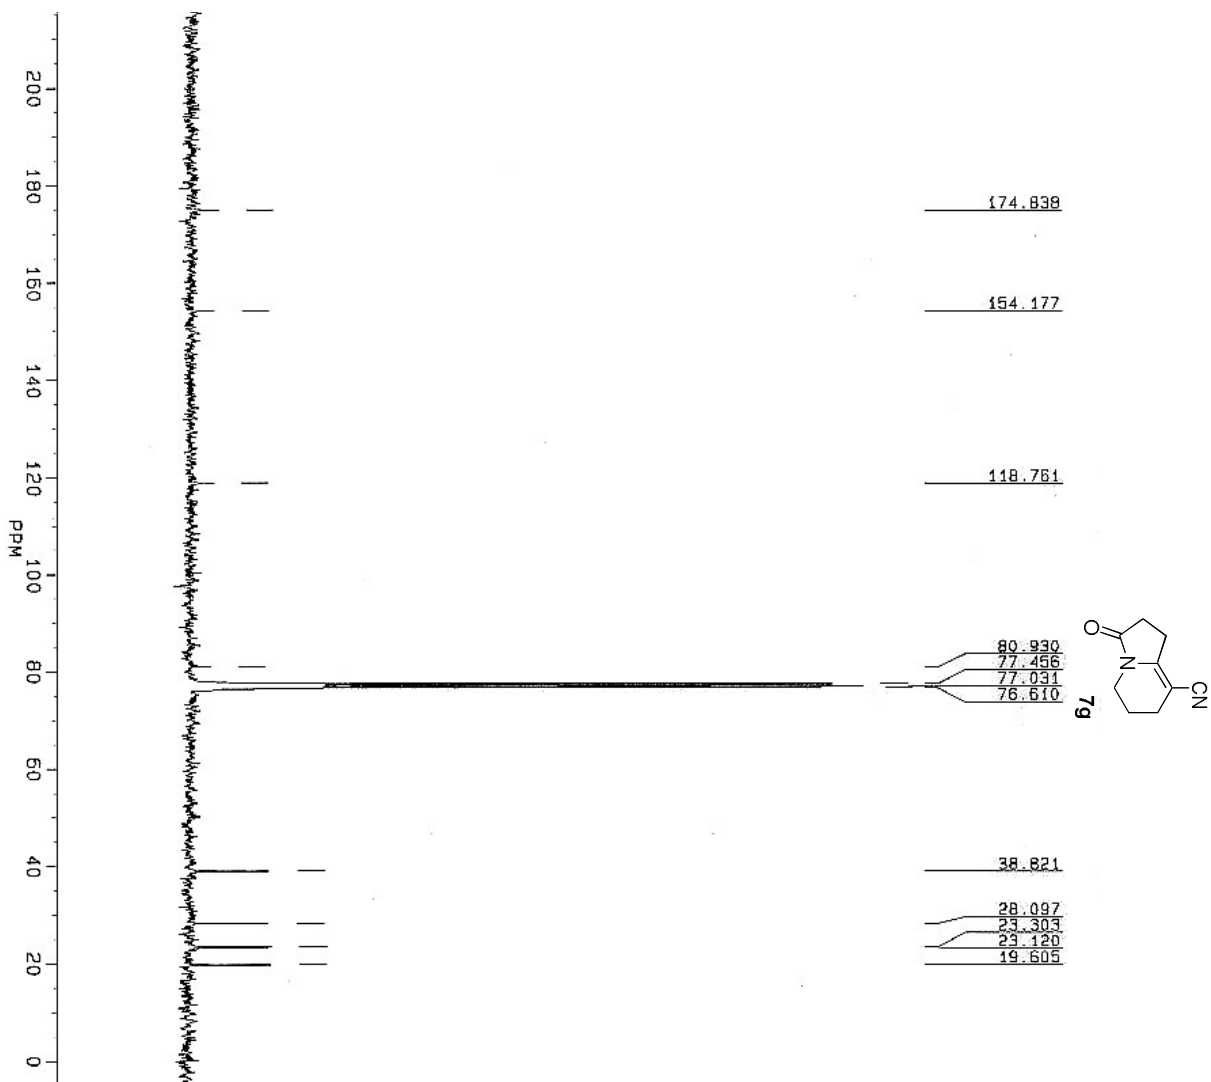

FFLF21.002  
DATE 25-3-1

SF 75.469  
 SY 75.0  
 O1 6447.202  
 S1 16384  
 TD 16384  
 SM 17857.143  
 HZ/PT 2.180

PM 4.0  
 RD 3.000  
 AG 459  
 RG 200  
 NS 7918  
 TE 297

FM 22400  
 D2 4004.452  
 DP 20H BB

LB 6.000  
 GB 0.0  
 CX 20.50  
 CY 40  
 F1 220.004P  
 F2 -5.001P  
 HZ/CM 828.334  
 PPM/CM 10.976  
 SR -1407.74

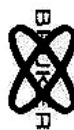

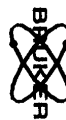

FLYA.007  
DATE 17-2-98  
TIME 15:47

SA.NO TEMP 101  
SOLVENT CDCl3  
SF 300.133  
SY 210.0  
O1 4800.000  
S1 16384  
TD 16384  
SM 4504.505  
HZ/PT .550  
PM 5.0  
PD 2.500  
AQ 1.819  
RG 16  
NS 16  
TE 297  
FM 5700  
O2 5684.205  
DP 4L PD  
LB .400  
GB 25.100  
CX 25.00  
CY 2.00  
F1 10.001P  
F2 -499P  
HZ/CM 126.051  
PPM/CM 3367.73  
SR 3367.73

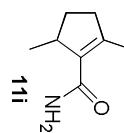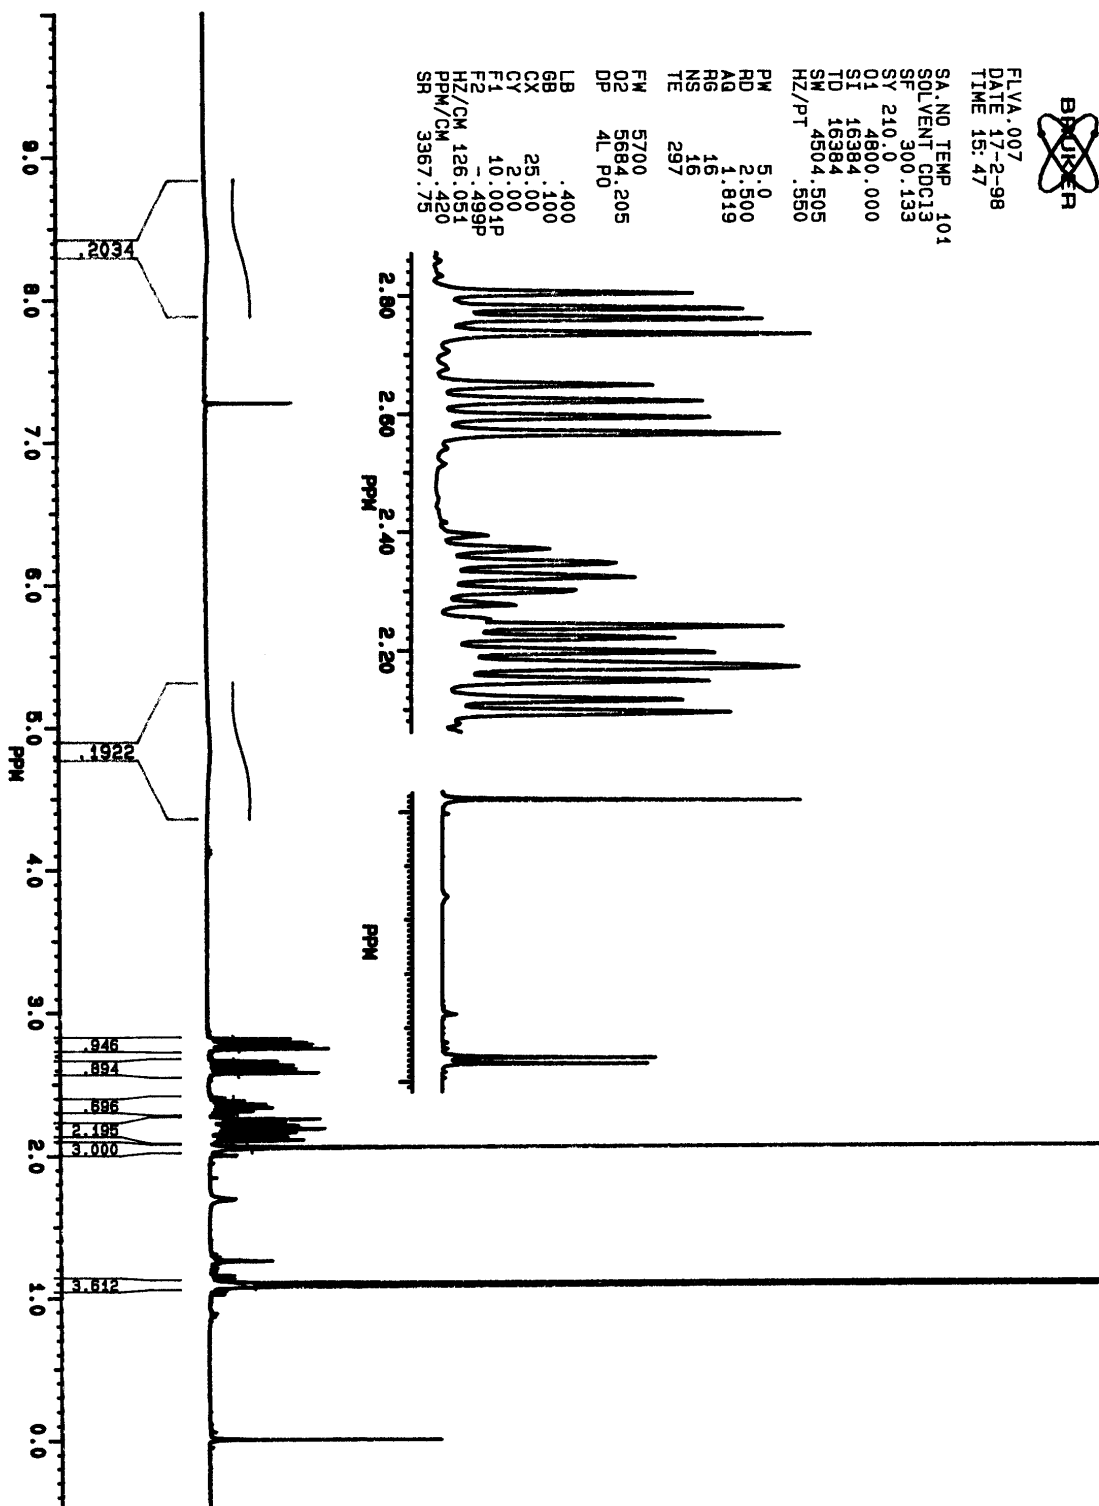

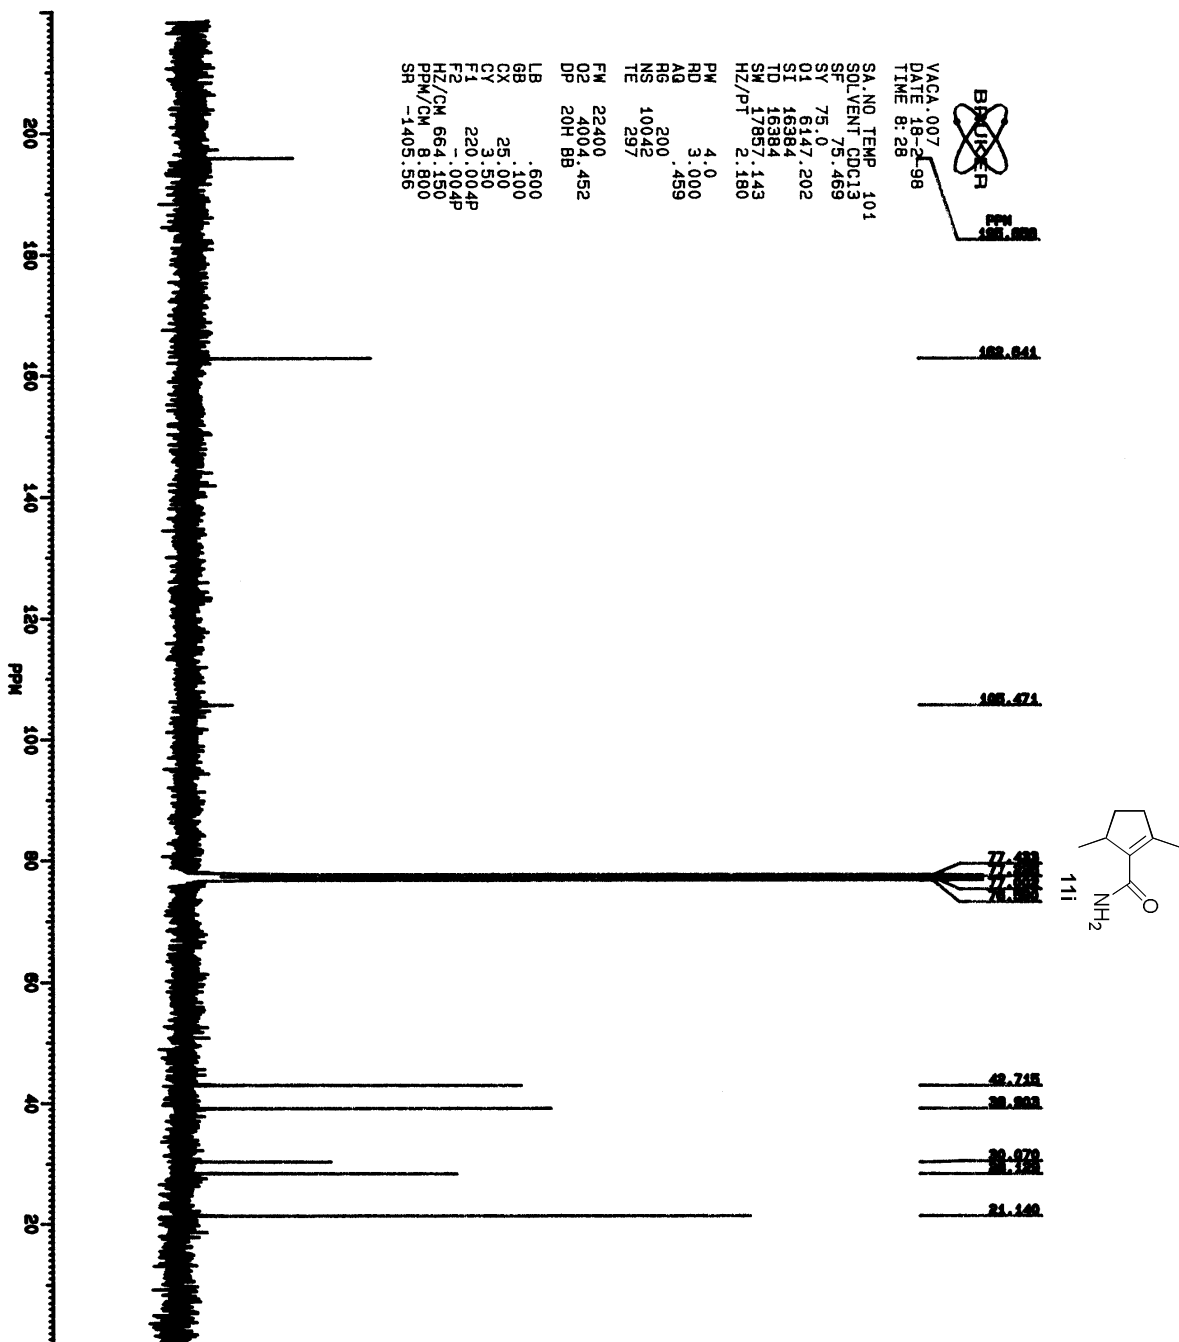



## References

- <sup>1</sup> Soli, E. D.; Manoso, A. S.; Patterson M. C.; DeShong, P.; Favor, D. A.; Hirschmann, R.; Smith, A. B. *J. Org. Chem.* **1999**, *64*, 3171.
- <sup>2</sup> Vaultier, M.; Lambert, P.H.; Carrie, R. *Bull. Soc. Chim. Fr.* **1986**, 83.
- <sup>3</sup> Montgomery, J.; Oblinger, E.; Savchenko, A. V. *J. Am. Chem. Soc.* **1997**, *119*, 4911.
- <sup>4</sup> Molander, Gary A.; Wolfe, Chad N. *J. Org. Chem.* **1998**, *63*, 9031.
- <sup>5</sup> Previously synthesized although no spectral data was reported: Shono, T.; Kise, N.; Fujimoto, T.; Tominaga, N.; Morita, H. *J. Org. Chem.* **1992**, *57*, 7175.
- <sup>6</sup> Previously synthesized although no spectral data was reported: Shono, T.; Kise, N.; Fujimoto, T.; Tominaga, N.; Morita, H. *J. Org. Chem.* **1992**, *57*, 7175.
- <sup>7</sup> Proffit, J. A.; Watt, D. S.; Corey, E. J. *J. Org. Chem.* **1975**, *40*, 127.
- <sup>8</sup> Commercially available from Acros.
- <sup>9</sup> Minor discrepancies exist with the <sup>13</sup>C NMR data reported for **7g** prepared previously: Gourves, J.-P.; Copulhon, H.; Sturtz, G. *Eur. J. Org. Chem.* **1999**, 3489.
- <sup>10</sup> Michael, J. P.; Jungmann, C. M. *Tetrahedron* **1992**, *48*, 10211.
